# Supplementary material for: Boronic esters: a simple route to discotic liquid crystals that are electron deficient
Source: Royal Society of Chemistry journal article supplement (doi:10.1039/c2sc20128c), 2012-01-01
Supplement: c2sc20128c.pdf [file c2sc20128c.pdf]

# **Boronic Esters: A Simple Route to Discotic Liquid Crystals that Are Electron Deficient**

Luke A. Tatum, Carey J. Johnson, Ashantha A. P. Fernando,  
Brianna C. Ruch, Krishna K. Barakoti, Mario A. Alpuche-Aviles,  
Benjamin T. King\*

*Department of Chemistry, University of Nevada, Reno, Reno, Nevada  
89557-0216*

|                                    |            |
|------------------------------------|------------|
| <b>Synthesis</b> .....             | <b>S2</b>  |
| <b>Electrochemistry</b> .....      | <b>S10</b> |
| <b>Spectra</b> .....               | <b>S11</b> |
| <b>NMR</b> .....                   | <b>S11</b> |
| <b>MS</b> .....                    | <b>S44</b> |
| <b>IR</b> .....                    | <b>S60</b> |
| <b>UV</b> .....                    | <b>S63</b> |
| <b>DSC</b> .....                   | <b>S65</b> |
| <b>DLC Stability</b> .....         | <b>S72</b> |
| <b>POM</b> .....                   | <b>S76</b> |
| <b>Computational Methods</b> ..... | <b>S78</b> |
| <b>Time of Flight</b> .....        | <b>S87</b> |

## Synthesis

All reactions were run under N<sub>2</sub>. THF was distilled from Na and benzophenone.

**General Synthesis of p-(3,7-dimethyloctyloxy)bromobenzene-** p-bromophenol (1.5 g, 8.67 mmol), 1-bromo-3,7-dimethyloctane (2.1 g, 9.537 mmol), K<sub>2</sub>CO<sub>3</sub> (2.39 g, 17.3 mmol), and 60 mL of dimethylformamide were added to a round bottom flask then put under N<sub>2</sub> atmosphere. The reaction was stirred at reflux for 12 hours. After aqueous extraction with ether (3 X 100 mL) the organic phases were combined, dried with MgSO<sub>4</sub>, and concentrated under vacuum yielding yellow oil. The crude yellow oil was purified by flash column chromatography (silica gel, hexanes) to produce 2.126 g of colorless oil with 78.3% yield.

**(1a)** p-hexyloxybromobenzene- <sup>1</sup>H NMR: (CDCl<sub>3</sub>, 400 MHz) δ = 0.91 (t, *J* = 7.2 Hz, 3 H), 1.30-1.37 (m, 4 H), 1.40-1.50 (m, 2 H), 1.77 (qnt, *J* = 7.6 Hz, 2 H), 3.90 (t, *J* = 6.8 Hz, 2 H), 6.75-6.79 (m, 2 H) 7.34-7.38 (m, 2 H) ppm. IR ν<sub>max</sub> (film) [cm<sup>-1</sup>]: 2928, 2857, 1591, 1488, 1285, 1240, 1169, 1071, 818. GCMS (EI, M<sup>+</sup>) found 256.

**(1b)** p-octyloxybromobenzene- <sup>1</sup>H NMR: (CDCl<sub>3</sub>, 400 MHz) δ = 0.89 (t, *J* = 7.2 Hz, 3 H), 1.25-1.40 (m, 8 H), 1.40-1.47 (m, 2 H), 1.76 (qnt, *J* = 8 Hz, 2 H), 3.91 (t, *J* = 6.4 Hz, 2 H), 6.75-6.79 (m, 2 H) 7.34-7.38 (m, 2 H) ppm. IR ν<sub>max</sub> (film) [cm<sup>-1</sup>]: 2922, 2853, 1590, 1488, 1285, 1242, 1169, 1071, 819. GCMS (EI, M<sup>+</sup>) found 284.

**(1c)** p-decyloxybromobenzene- <sup>1</sup>H NMR: (CDCl<sub>3</sub>, 400 MHz) δ = 0.87 (t, *J* = 6.8 Hz, 3 H), 1.25-1.40 (m, 12 H), 1.40-1.47 (m, 2 H), 1.76 (qnt, *J* = 8 Hz, 2 H), 3.91 (t, *J* = 6.8 Hz, 2 H), 6.77 (d, *J* = 8.8 Hz, 2 H) 7.36 (d, *J* = 8.8 Hz, 2 H) ppm; GCMS (EI, M<sup>+</sup>) found 312.

**(1d)** p-dodecyloxybromobenzene- <sup>1</sup>H NMR: (CDCl<sub>3</sub>, 400 MHz) δ = 0.88 (t, *J* = 6.8 Hz, 3 H), 1.25-1.37 (m, 16 H), 1.40-1.50 (m, 2 H), 1.77(qnt, *J* = 7.6 Hz, 2 H), 3.91 (t, *J* = 6.8 Hz, 2 H), 6.75-6.79 (m, 2 H) 7.34-7.38 (m, 2 H) ppm. IR ν<sub>max</sub> (film) [cm<sup>-1</sup>]: 2915, 2848, 1591, 1578, 1490, 1475, 1282, 1236, 1172, 819. GCMS (EI, M<sup>+</sup>) found 340.

**(1e)** p-(3,7-dimethyloctyloxy)bromobenzene- <sup>1</sup>H NMR: (CDCl<sub>3</sub>, 400 MHz) δ = 0.87 (d, *J* = 6.8 Hz, 6 H), 0.93 (d, *J* = 6.8 Hz, 3 H), 1.12-1.20 (m, 3 H), 1.25-1.34 (m, 3 H), 1.50-1.60 (m, 2 H), 1.62-1.69 (m, 1 H), 1.76-1.84 (m, 1 H), 3.88-3.97 (m, 2 H), 6.73-6.77 (m, 2 H), 7.31-7.35 (m, 2 H) ppm. <sup>13</sup>C NMR (CDCl<sub>3</sub>, 100 MHz) δ = 158.6, 132.5, 116.6, 112.9, 66.8, 39.6, 37.6, 36.4, 30.2, 28.3, 25.0, 23.1, 23.0, 20.0 ppm. IR ν<sub>max</sub> (film) [cm<sup>-1</sup>]: 2930, 2854, 1595, 1573, 1436, 1161, 1045, 828. HRMS (APPI-TOF, M<sup>+</sup>) C<sub>16</sub>H<sub>21</sub>BrO calc 312.1089, found 312.1309.

**(1f)** p-(2-ethylhexyloxy)bromobenzene- <sup>1</sup>H NMR: (CDCl<sub>3</sub>, 400 MHz) δ = 0.87-0.92 (m, 6 H), 1.27-1.33 (m, 4 H), 1.35-1.50 (m, 4 H), 1.69 (spt, *J* = 6 Hz, 1 H) 3.78 (dd, *J*<sub>1</sub> = 6 Hz, *J*<sub>2</sub> = 10.4 Hz 2 H), 3.80 (dd, *J*<sub>1</sub> = 6 Hz, *J*<sub>2</sub> = 10.4 Hz 2 H), 6.74-6.78 (m, 2 H), 7.32-7.36 (m, 2 H) ppm. IR ν<sub>max</sub> (film) [cm<sup>-1</sup>]: 2959, 2924, 2857, 1590, 1488, 1466, 1284, 1241, 1169, 1071, 818. GCMS (EI, M<sup>+</sup>) found 284.

**General synthesis for 3,5-dihexyloxybromobenzene-** 5-bromoresorcinol (1.199 g, 6.35 mmol), 1-bromohexane (2.199 g, 13.33 mmol),  $K_2CO_3$  (2.633 g, 19.05 mmol), and 60 mL of dimethylformamide were added to a round bottom flask then put under  $N_2$  atmosphere. The reaction was then stirred at reflux for 15 hours. After aqueous extraction with ether (3 X 100 mL) the organic phases were combined, dried with  $MgSO_4$ , and concentrated under vacuum yielding yellow oil. The crude yellow oil was purified by flash column chromatography (silica gel, hexanes) to produce 2.013 g of colorless oil with 88.8% yield.

**(1g)** 3,5-dihexyloxybromobenzene-  $^1H$  NMR ( $CDCl_3$ , 400 MHz)  $\delta$  = 0.90 (t,  $J$  = 7.2 Hz, 6 H), 1.29-1.38 (m, 8 H), 1.40-1.47 (m, 4 H), 1.75 (qnt,  $J$  = 8 Hz, 4 H), 3.89 (t,  $J$  = 6.8 Hz, 4 H), 6.36 (t,  $J$  = 2.4, 1 H), 6.64 (d,  $J$  = 2.4 Hz, 2 H) ppm.  $^{13}C$  NMR ( $CDCl_3$ , 100 MHz)  $\delta$  = 161.1, 123.1, 110.6, 100.9, 68.6, 31.9, 29.4, 26.0, 22.9, 14.4 ppm. IR  $\nu_{max}$  (film) [ $cm^{-1}$ ]: 2930, 2854, 1595, 1573, 1436, 1161, 1045, 828. HRMS (APPI-TOF,  $M^+$ )  $C_{18}H_{29}BrO_2$  calc 356.1351, found 355.9176.

**(1h)** 3,5-dioctyloxybromobenzene-  $^1H$  NMR ( $CDCl_3$ , 400 MHz)  $\delta$  = 0.89 (t,  $J$  = 6.8 Hz, 6 H), 1.21-1.35 (m, 16 H), 1.40-1.48 (m, 4 H), 1.74 (qnt,  $J$  = 8 Hz, 4 H), 3.89 (t,  $J$  = 6.4 Hz, 4), 6.36 (t,  $J$  = 2.2 Hz, 1 H), 6.63 (d,  $J$  = 2.2 Hz, 2 H) ppm.  $^{13}C$  NMR ( $CDCl_3$ , 100 MHz)  $\delta$  = 160.7, 122.8, 110.2, 100.6, 68.3, 31.8, 29.3, 29.2, 29.1, 26.0, 22.6, 14.1 ppm. IR  $\nu_{max}$  (film) [ $cm^{-1}$ ]: 2920, 2851, 1595, 1571, 1433, 1163, 1045, 829. HRMS (APPI-TOF,  $M^+$ ) calcd for  $C_{22}H_{37}BrO_2$  calc 412.1977, found 412.1786.

**(1i)** 3,5-didecyloxybromobenzene-  $^1H$  NMR ( $CDCl_3$ , 400 MHz)  $\delta$  = 0.88 (t,  $J$  = 7.2 Hz, 6 H), 1.20-1.34 (m, 24 H), 1.38-1.46 (m, 4 H), 1.74 (qnt,  $J$  = 8 Hz, 4 H), 3.88 (t,  $J$  = 6.4 Hz, 4), 6.35 (t,  $J$  = 2.2 Hz, 1 H), 6.62 (d,  $J$  = 2.2 Hz, 2 H) ppm.  $^{13}C$  NMR ( $CDCl_3$ , 100 MHz)  $\delta$  = 160.7, 122.8, 110.2, 68.2, 31.9, 29.7, 29.7, 29.6, 29.6, 29.4, 29.1, 26.0, 22.7, 14.1 ppm. IR  $\nu_{max}$  (film) [ $cm^{-1}$ ]: 2920, 2851, 1595, 1571, 1433, 1163, 1045, 829. HRMS (APPI-TOF,  $M^+$ )  $C_{26}H_{45}BrO_2$  calc 468.2604, found 468.2705.

**(1j)** 3,5-didodecyloxybromobenzene-  $^1H$  NMR ( $CDCl_3$ , 400 MHz)  $\delta$  = 0.88 (t,  $J$  = 7.2 Hz, 6 H), 1.20-1.34 (m, 32 H), 1.38-1.46 (m, 4 H), 1.74 (qnt,  $J$  = 6.4, 4 H), 3.88 (t,  $J$  = 6.4 Hz, 4), 6.35 (t,  $J$  = 2.2 Hz, 1 H), 6.62 (d,  $J$  = 2.2 Hz, 2 H) ppm.  $^{13}C$  NMR ( $CDCl_3$ , 100 MHz)  $\delta$  = 160.7, 122.8, 110.2, 68.2, 31.9, 29.7, 29.7, 29.6, 29.6, 29.4, 29.1, 26.0, 22.7, 14.1 ppm. IR  $\nu_{max}$  (film): 2915, 2845, 1595, 1561, 1436, 1155, 1045, 837. HRMS (APPI-TOF,  $M^+$ )  $C_{30}H_{53}BrO_2$  calc 524.3231 found 524.2992. M.P. 35-37 °C.

**(1k)** 3,5-di(3,7-dimethyloctyloxy)bromobenzene-  $^1H$  NMR ( $CDCl_3$ , 400 MHz)  $\delta$  = 0.87 (d,  $J$  = 6.8 Hz, 12 H), 0.92 (d,  $J$  = 6.8 Hz, 6 H), 1.13-1.19 (m, 6 H), 1.24-1.37 (m, 6 H), 1.50-1.59 (m, 4 H), 1.63-1.70 (m, 2 H), 1.79 (sxt,  $J$  = 6.8 Hz, 2 H), 3.88-3.95 (m, 4 H), 6.36 (t,  $J$  = 2.2 Hz, 1 H), 6.63 (d,  $J$  = 2.2 Hz, 2 H) ppm;  $^{13}C$  NMR ( $CDCl_3$ , 100 MHz)  $\delta$  = 161.1, 123.2, 110.5, 100.9, 66.9, 39.6, 37.6, 36.4, 30.2, 28.3, 25.0, 23.1, 23.0, 20.0 ppm. IR  $\nu_{max}$  (film) [ $cm^{-1}$ ]: 2952, 2942, 2868, 1595, 1574, 1436, 1163, 1051, 830. HRMS (APPI-TOF,  $M^+$ )  $C_{26}H_{45}BrO_2$  calc 468.2604, found 468.2423.

(11) 3,5-di(2-ethylhexyl)bromobenzene-  $^1\text{H}$  NMR ( $\text{CDCl}_3$ , 400 MHz)  $\delta$  = 0.90 (t,  $J$  = 7.2 Hz, 6 H), 0.92 (t,  $J$  = 7.2 Hz, 6 H), 1.27-1.35 (m, 10 H), 1.35-1.56 (m, 8 H), 1.69 (spt,  $J$  = 2 Hz, 2 H), 3.78 (dd,  $J_1$  = 5.6 Hz,  $J_2$  = 9.1 Hz, 2 H), 3.80 (dd,  $J_1$  = 5.6 Hz,  $J_2$  = 9.1 Hz, 2 H), 6.35 (t,  $J$  = 2.2 Hz, 1 H), 6.62 (d,  $J$  = 2.2 Hz, 2 H) ppm;  $^{13}\text{C}$  NMR ( $\text{CDCl}_3$ , 100 MHz)  $\delta$  = 161.0, 122.7, 110.1, 100.5, 70.7, 39.3, 30.5, 29.0, 23.8, 26.0, 14.0, 11.1 ppm. IR  $\nu_{\text{max}}$  (film) [ $\text{cm}^{-1}$ ]: 2958, 2920, 2858, 1591, 1574, 1433, 1164, 1050, 825. HRMS (APPI-TOF,  $\text{M}^+$ )  $\text{C}_{22}\text{H}_{37}\text{BrO}_2$  calc 412.1977, found 412.1858.

**General synthesis for p-hexyloxybenzene boronic acid-** p-hexyloxybromobenzene (2.733 g, 10.63 mmol) in 40 mL of THF was put under  $\text{N}_2$  atmosphere in a schlenk flask. 1.6 M BuLi in hexanes (9.97 mL, 15.95 mmol) was added drop-wise and let stir for 30 minutes at  $-78^\circ\text{C}$ . Triisopropylborate (7.36 mL, 31.9 mmol) was added dropwise at  $-78^\circ\text{C}$  then let stir and warm to room temperature for 12 hours. 10 mL of 3 M HCl was then added and the reaction was stirred for 30 minutes. The resulting crude boronic acid was then taken directly on to further synthesis. For characterization, the crude boronic acid (116 mg, 0.523 mmol) and N-methyliminodiacetic acid (85 mg, 0.575 mmol) were dissolved in 20 ml of toluene and 2 mL of DMSO. The reaction was then refluxed with a Dean Stark trap for 3 hours. The solvent was removed resulting in yellow oil, which was purified by flash column chromatography (silica gel, ethylacetate). The product 120 mg of colorless solid was obtained in 69.2% yield.

(2a) p-hexyloxybenzene MIDA boronate-  $^1\text{H}$  NMR ( $\text{CDCl}_3$ , 400 MHz)  $\delta$  = 0.90 (t,  $J$  = 7.2 Hz, 3 H), 1.30-1.36 (s, 4 H), 1.40-1.47 (m, 2 H), 1.75 (qnt,  $J$  = 8 Hz, 2 H), 2.47 (s, 3 H), 3.90 (t,  $J$  = 6.4 Hz, 2 H), 4.00 (dd,  $J_1$  = 16.8,  $J_2$  = 166.8, 4 H), 6.85 (d,  $J$  = 8 Hz, 2 H), 7.38 (d,  $J$  = 8 Hz, 2 H) ppm;  $^{13}\text{C}$  NMR ( $\text{CDCl}_3$ , 100 MHz)  $\delta$  = 169.1, 160.4, 133.7, 125.6, 114.4, 67.8, 61.8, 47.7, 31.6, 29.2, 25.7, 22.6, 14.0 ppm; IR  $\nu_{\text{max}}$  (film) [ $\text{cm}^{-1}$ ]: 2924, 2860, 1777, 1746, 1598, 1339, 1241, 1170, 1027, 831, 818, 744, 686. HRMS (APPI-TOF,  $\text{M}^+$ )  $\text{C}_{17}\text{H}_{24}\text{BNO}_5$  calc 333.1748 found 332.9671; M.P. 88-91  $^\circ\text{C}$ .

(2b) p-octyloxybenzene MIDA boronate-  $^1\text{H}$  NMR ( $\text{CDCl}_3$ , 400 MHz)  $\delta$  = 0.88 (t,  $J$  = 7.2 Hz, 3 H), 1.25-1.35 (m, 16 H), 1.39-1.46 (m, 4 H), 1.75 (qnt,  $J$  = 8 Hz, 2 H), 2.51 (s, 3 H), 3.89 (t,  $J$  = XXX, 2 H), 4.00 (dd,  $J_1$  = 17.2,  $J_2$  = 170.4, 4 H), 6.84 (d,  $J$  = 8.4 Hz, 2 H), 7.37 (d,  $J$  = 8.4 Hz, 2 H) ppm;  $^{13}\text{C}$  NMR ( $\text{CDCl}_3$ , 100 MHz)  $\delta$  = 169.5, 160.8, 134.0, 114.7, 68.1, 62.1, 48.0, 32.1, 29.7, 29.6, 29.5, 26.4, 23.0, 14.4 ppm; IR  $\nu_{\text{max}}$  (film) [ $\text{cm}^{-1}$ ]: 3007, 2924, 2849, 1742, 1601, 1460, 1305, 1223, 1173, 1034, 993, 821 HRMS (APPI-TOF,  $\text{M}^+$ )  $\text{C}_{19}\text{H}_{28}\text{BNO}_5$  calc 361.2061 found 360.9792; M.P. 86-88  $^\circ\text{C}$ .

(2c) p-decyloxybenzene MIDA boronate-  $^1\text{H}$  NMR ( $\text{CDCl}_3$ , 400 MHz)  $\delta$  = 0.88 (t,  $J$  = 6.8 Hz, 3 H), 1.22-1.39 (m, 12 H), 1.40-1.48 (m, 2 H), 1.77 (qnt,  $J$  = 6.8 Hz, 2 H), 2.51 (s, 3 H), 3.92 (dd,  $J_1$  = 16.8 Hz,  $J_2$  = 126.8 Hz, 4 H), 3.93 (t,  $J$  = 6.8 Hz, 2 H), 6.88 (d,  $J$  = 8.4 Hz, 2 H), 7.40 (d,  $J$  = XXX Hz, 2 H) ppm;  $^{13}\text{C}$  NMR ( $\text{CDCl}_3$ , 100 MHz)  $\delta$  = 168.2, 160.6, 133.7, 114.4, 67.8, 61.7, 47.5, 29.5, 29.4, 29.3, 29.2, 26.0, 22.7, 14.1 ppm; IR  $\nu_{\text{max}}$  (film) [ $\text{cm}^{-1}$ ]: 3009, 2914, 2848, 1742, 1605, 1457, 11302, 1220, 1177, 1032, 992, 818. HRMS (APPI-TOF,  $\text{M}^+$ )  $\text{C}_{21}\text{H}_{32}\text{BNO}_5$  calc 389.2374 found 389.2631; M.P. 112-119  $^\circ\text{C}$ .

**(2d)** p-dodecyloxybenzene MIDA boronate-  $^1\text{H}$  NMR ( $\text{CDCl}_3$ , 400 MHz)  $\delta$  = 0.88 (t,  $J$  = 7.2 Hz, 3 H), 1.23-1.39 (m, 16 H), 1.40-1.48 (m, 2 H), 1.77 (qnt,  $J$  = 8.4 Hz, 2 H), 2.51 (s, 3 H), 3.93 (t,  $J$  = 6.4 Hz, 2 H), 3.93 (dd,  $J_1$  = 16.8 Hz,  $J_2$  = 130.8 Hz, 4 H), 6.88 (d,  $J$  = 8.4 Hz, 2 H), 7.40 (d,  $J$  = 8.4 Hz, 2 H) ppm;  $^{13}\text{C}$  NMR ( $\text{CDCl}_3$ , 100 MHz)  $\delta$  = 168.6, 160.9, 134.0, 114.8, 68.2, 62.1, 47.9, 30.0, 30.0, 30.0, 29.9, 29.8, 29.7, 29.6, 23.0, 14.5 ppm; IR  $\nu_{\text{max}}$  (film) [ $\text{cm}^{-1}$ ]: 3007, 2914, 2847, 1742, 1603, 1460, 1228, 1032, 993, 821. HRMS (APPI-TOF,  $\text{M}^+$ )  $\text{C}_{23}\text{H}_{36}\text{BNO}_5$  calc 417.2687 found 417.0125; M.P. 116-121 °C.

**(2e)** p-(3,7-dimethyloctyloxy)benzene MIDA boronate-  $^1\text{H}$  NMR ( $\text{CDCl}_3$ , 400 MHz)  $\delta$  = 0.80 (d,  $J$  = 6.4 Hz, 6 H), 0.86 (d,  $J$  = 6.4 Hz, 3 H), 1.04-1.14 (m, 3 H), 1.19-1.30 (m, 3 H), 1.41-1.53 (m, 2H), 1.54-1.64 (m, 1 H), 1.69-1.80 (m, 1 H), 2.43 (s, 3 H), 3.84-3.94 (m, 2 H), 3.93 (dd,  $J_1$  = 16.8 Hz,  $J_2$  = 130.8 Hz, 4 H), 6.80 (d,  $J$  = 8.4 Hz, 2 H), 7.33 (d,  $J$  = 8.0 Hz, 2 H) ppm;  $^{13}\text{C}$  NMR ( $\text{CDCl}_3$ , 100 MHz)  $\delta$  = 167.8, 159.5, 132.7, 113.4, 65.1, 60.8, 46.7, 38.2, 36.3, 35.2, 28.8, 27.0, 23.6, 21.7, 21.6, 18.6 ppm; IR  $\nu_{\text{max}}$  (film) [ $\text{cm}^{-1}$ ]: 2955, 2962, 2869, 1743, 1603, 1459, 1217, 1178, 1034, 988, 822. HRMS (APPI-TOF,  $\text{M}^+$ )  $\text{C}_{21}\text{H}_{32}\text{BNO}_5$  calc 389.2374 found 388.9968; M.P. 127-130 °C.

**(2f)** p-(2-ethylhexyloxy)benzene MIDA boronate-  $^1\text{H}$  NMR ( $\text{CDCl}_3$ , 400 MHz)  $\delta$  = 0.89-0.92 (m, 6 H), 1.30-1.35 (m, 4 H), 1.35-1.42 (m, 4 H), 1.64-1.72 (s, 1 H), 2.48 (s, 3 H), 3.78 (m, 4 H), 4.24 (m, 2 H), 6.86 (d,  $J$  = 8 Hz, 2 H), 7.38 (d,  $J$  = 8 Hz, 2 H) ppm;  $^{13}\text{C}$  NMR ( $\text{CDCl}_3$ , 100 MHz)  $\delta$  = 169.6, 161.0, 134.0, 125.8, 114.7, 70.5, 62.1, 48.0, 39.7, 30.8, 29.4, 24.1, 23.3, 14.4, 11.4 ppm; IR  $\nu_{\text{max}}$  (film) [ $\text{cm}^{-1}$ ]: 2958, 2927, 2856, 1763, 1739, 1601, 1512, 1284, 1213, 1176, 1034, 987, 825, 632. HRMS (APPI-TOF,  $\text{M}^+$ )  $\text{C}_{19}\text{H}_{28}\text{BNO}_5$  calc 361.2061 found 361.2107 M.P. 178-180 °C.

**General synthesis for 3,5-dihexyloxybenzene MIDA boronates-** 3,5-dihexyloxybromobenzene (3.874 g, 15.13 mmol) in 40 mL of THF was put under  $\text{N}_2$  atmosphere in a schlenk flask. 1.6 M BuLi in hexanes (11.35 mL, 18.17 mmol) was added drop-wise and let stir for 30 minutes at  $-78^\circ\text{C}$ . triisopropylborate (6.98 mL, 30.25 mmol) was added dropwise at  $-78^\circ\text{C}$  then let warm to room temperature and stir for 12 hours. 20 mL of 3 M HCl was then added and the reaction was stirred for 30 minutes the resulting crude boronic acid was then take directly on to further synthesis. For characterization, the crude boronic acid (60 mg 0.187 mmol) and N-methyliminodiacetic acid (30 mg, 0.224 mmol) were dissolved in 15 ml of toluene and 1.2 mL of DMSO. The reaction was then refluxed with a Dean Stark trap for 3 hours. The solvent was removed resulting in yellow oil, which was purified with flash column chromatography (silica gel, ethylacetate). The product 87 mg a colorless solid, was obtained in 90% yield.

**(2g)** 3,5-dihexyloxybenzene MIDA boronate-  $^1\text{H}$  NMR ( $\text{CDCl}_3$ , 400 MHz)  $\delta$  = 0.91 (t,  $J$  = 6.4 Hz, 6 H), 1.26-1.38 (m, 8 H), 1.41-1.48 (m, 4 H), 1.76 (qnt,  $J$  = 8 Hz, 4 H), 2.59 (s, 3 H), 3.84 (dd  $J_1$  = 16.4,  $J_2$  = 54, 4H), 3.93 (t,  $J$  = 6.6 Hz, 4 H), 6.49 (t,  $J$  = 2.4 Hz, 1 H), 6.61 (d,  $J$  = 2.4 Hz, 2 H) ppm;  $^{13}\text{C}$  NMR ( $\text{CDCl}_3$ , 100 MHz)  $\delta$  = 167.0, 160.6, 110.2, 102.6, 68.1, 61.7, 47.3, 31.6, 29.3, 25.7, 22.6, 14.0 ppm; IR  $\nu_{\text{max}}$  (film) [ $\text{cm}^{-1}$ ]: 2923, 2851, 1765, 1584, 1465, 1424, 1287, 1166, 1027. HRMS (APPI-TOF,  $\text{M}^+$ )  $\text{C}_{23}\text{H}_{36}\text{BNO}_5$  calc 433.2636 found 433.2873.

**(2h)** 3,5-dioctyloxybenzene MIDA boronate-  $^1\text{H}$  NMR ( $\text{CDCl}_3$ , 400 MHz)  $\delta$  = 0.88 (t,  $J$  = 6.8 Hz, 6 H), 1.25-1.35 (m, 16 H), 1.37-1.47 (m, 4 H), 1.72 (qnt,  $J$  = 2.4 Hz, 4 H), 2.55 (s, 3 H), 3.90 (t,  $J$  = 6.4 Hz, 4 H), 4.03 (dd,  $J_1$  = 17.2,  $J_2$  = 171.6, 4H), 6.45 (t,  $J$  = 2 Hz, 1 H), 6.60 (d,  $J$  = 2 Hz, 2 H) ppm;  $^{13}\text{C}$  NMR ( $\text{CDCl}_3$ , 100 MHz)  $\delta$  = 169.0, 160.5, 137.0, 110.1, 102.4, 68.1, 61.9, 47.8, 31.8, 29.4, 29.3, 29.2, 26.1, 22.6, 14.1 ppm; IR  $\nu_{\text{max}}$  (film) [ $\text{cm}^{-1}$ ]: 2923, 2854, 1764, 1582, 1424, 1286, 1159, 1025, 834. HRMS (APPI-TOF,  $\text{M}^+$ )  $\text{C}_{27}\text{H}_{44}\text{BNO}_5$  calc 489.3262 found 489.0255; M.P. 71-74 °C.

**(2i)** 3,5-bisdecyloxy benzene MIDA boronate-  $^1\text{H}$  NMR ( $\text{CDCl}_3$ , 400 MHz)  $\delta$  = 0.85 (t,  $J$  = 6.8 Hz, 6 H), 1.20-1.30 (m, 24 H), 1.35-1.45 (m, 4 H), 1.71 (qnt,  $J$  = 8 Hz, 4 H), 2.53 (s, 3 H), 3.88 (t,  $J$  = 6.8 Hz, 4 H), 3.94 (dd,  $J_1$  = 16.8,  $J_2$  = 137.2, 4 H), 6.44 (t,  $J$  = 2 Hz, 1 H), 6.57 (d,  $J$  = 2 Hz, 2 H) ppm;  $^{13}\text{C}$  NMR ( $\text{CDCl}_3$ , 100 MHz)  $\delta$  = 168.7, 160.9, 137.1, 110.5, 102.8, 68.4, 62.2, 48.0, 32.2, 29.9, 29.9, 29.8, 29.7, 29.7, 26.4, 23.0, 14.4 ppm; IR  $\nu_{\text{max}}$  (film) [ $\text{cm}^{-1}$ ]: 2923, 2852, 1766, 1582, 1423, 1336, 1286, 1159, 1024, 836. HRMS (APPI-TOF,  $\text{M}^+$ )  $\text{C}_{31}\text{H}_{52}\text{BNO}_5$  calc 545.3889 found 545.4114.

**(2j)** 3,5-didodecyloxybenzene MIDA boronate-  $^1\text{H}$  NMR ( $\text{CDCl}_3$ , 400 MHz)  $\delta$  = 0.81 (t,  $J$  = 6.8 Hz, 6 H), 1.20-1.30 (m, 32 H), 1.30-1.40 (m, 4 H), 1.67 (qnt,  $J$  = 8 Hz, 4 H), 2.55 (s, 3 H), 3.84 (t,  $J$  = 6.8 Hz, 4 H), 3.84 (dd,  $J_1$  = 16.4,  $J_2$  = 105.2, 4 H), 6.53 (t,  $J$  = 2.4 Hz, 1 H), 6.41 (d,  $J$  = 2.4 Hz, 2 H) ppm;  $^{13}\text{C}$  NMR ( $\text{CDCl}_3$ , 100 MHz)  $\delta$  = 168.2, 160.9, 110.5, 102.9, 68.6, 62.2, 47.9, 32.3, 30.0, 30.0, 30.0, 29.9, 29.8, 29.7, 26.4, 23.0, 14.5 ppm; IR  $\nu_{\text{max}}$  (film) [ $\text{cm}^{-1}$ ]: 2923, 2853, 1769, 1423, 1338, 1286, 1161, 1026. HRMS (APPI-TOF,  $\text{M}^+$ )  $\text{C}_{35}\text{H}_{60}\text{BNO}_5$  calc 601.4515 found 601.4729; M.P. 116-117 °C.

**(2k)** 3,5-di(3,7-dimetyloxy)benzene MIDA boronate-  $^1\text{H}$  NMR ( $\text{CDCl}_3$ , 400 MHz)  $\delta$  = 0.80 (d,  $J$  = 6.8 Hz, 12 H), 0.86 (d,  $J$  = 6.4 Hz, 6 H), 1.05-1.12 (m, 6 H), 1.16-1.30 (m, 6 H), 1.41-1.51 (m, 4 H), 1.54-1.62 (m, 2 H), 1.69-1.78 (m, 2 H), 2.50 (s, 3 H), 3.84-3.93 (m, 4 H), 3.85 (dd,  $J_1$  = 16.4 Hz,  $J_2$  = 112.4 Hz, 4 H), 6.41 (t,  $J$  = 2 Hz, 2 H), 6.53 (d,  $J$  = 2 Hz, 2 H) ppm;  $^{13}\text{C}$  NMR ( $\text{CDCl}_3$ , 100 MHz)  $\delta$  = 167.0, 159.5, 109.2, 101.5, 65.4, 60.8, 46.6, 38.2, 36.3, 35.3, 28.8, 27.0, 23.6, 21.7, 18.6 ppm; IR  $\nu_{\text{max}}$  (film) [ $\text{cm}^{-1}$ ]: 2953, 2924, 2868, 1769, 1585, 1424, 1335, 1286, 1163, 1028, 840. HRMS (APPI-TOF,  $\text{M}^+$ )  $\text{C}_{31}\text{H}_{52}\text{BNO}_5$  calc 545.3889 found 545.4109.

**(2l)** 3,5-di(2-ethylhexyloxy)benzene MIDA boronate-  $^1\text{H}$  NMR ( $\text{CDCl}_3$ , 400 MHz)  $\delta$  = 0.88-0.92 (m, 12 H), 1.27-1.34 (m, 8 H), 1.35-1.55 (m, 8 H), 1.67 (spt,  $J$  = 4.8 Hz, 2 H), 2.43 (s, 3 H), 3.80-3.82 (m, 4 H), 3.98 (dd,  $J_1$  = 13.6 Hz,  $J_2$  = 141.2 Hz, 4 H), 6.48 (t,  $J$  = 1.6 Hz, 2 H), 6.60 (d,  $J$  = 1.6 Hz, 2 H) ppm;  $^{13}\text{C}$  NMR ( $\text{CDCl}_3$ , 100 MHz)  $\delta$  = 168.4, 160.8, 136.6, 110.1, 102.4, 70.5, 61.9, 47.7, 39.5, 30.5, 29.1, 23.8, 23.0, 14.1, 11.1 ppm; IR  $\nu_{\text{max}}$  (film) [ $\text{cm}^{-1}$ ]: 2957, 2927, 2858, 1766, 1584, 1423, 1338, 1281, 1167, 1024, 836, 768. HRMS (APPI-TOF,  $\text{M}^+$ )  $\text{C}_{27}\text{H}_{44}\text{BNO}_5$  calc 489.3262 found 489.3308; M.P. 179-180 °C.

**General synthesis for p-substituted triphenylene catechol boronate discotics-** p-(3,7-dimethyl)oxybenzene boronic acid (1.38 g, 5.54 mmol) and hexahydroxytriphenylene (0.449 g, 1.39 mmol) were dissolved in 60 mL of acetonitrile

and refluxed for 12 hours or until the product precipitated out of solution. The product was then obtained by vacuum filtration, and purified by dissolving in chloroform and passing through a celite pad, then precipitated with acetonitrile resulting in 0.540 g of an off-white solid obtained with 40% yield.

**(4a)** p-hexyloxy discotic -  $^1\text{H}$  NMR ( $\text{CDCl}_3$ , 400 MHz)  $\delta$  = 0.96 (t,  $J$  = 5.6 Hz, 9 H), 1.35-1.42 (m, 12 H), 1.45-1.55 (m, 6 H), 1.81 (qnt,  $J$  = 7.2 Hz, 6 H), 3.93 (t,  $J$  = 6.4 Hz, 6 H), 6.91 (d,  $J$  = 8 Hz, 6 H), 7.91 (d,  $J$  = 8 Hz, 6 H) 7.94 (s, 6 H) ppm;  $^{13}\text{C}$  NMR ( $\text{CDCl}_3$ , 100 MHz)  $\delta$  = 163.2, 148.8, 137.3, 125.9, 114.8, 105.8, 68.3, 32.1, 29.7, 26.1, 23.0, 14.4 ppm; IR  $\nu_{\text{max}}$  (film) [ $\text{cm}^{-1}$ ]: 2913, 2850, 1757, 1593, 1601, 1219, 1177, 998, 859, 816, 622. HRMS (APPI-TOF,  $\text{M}^+$ )  $\text{C}_{54}\text{H}_{57}\text{B}_3\text{O}_9$  calc 882.4277 found 882.4117.

**(4b)** p-octyloxy discotic -  $^1\text{H}$  NMR ( $\text{CDCl}_3$ , 400 MHz)  $\delta$  = 0.93 (t,  $J$  = 6.8 Hz, 9 H), 1.30-1.43 (m, 24 H), 1.47-1.54 (m, 6 H), 1.83 (qnt,  $J$  = 7.2, 6 H), 3.95 (t,  $J$  = 6.8 Hz, 6 H), 6.92 (d,  $J$  = 8.4 Hz, 6 H), 7.93 (d,  $J$  = 8.4 Hz, 6 H), 7.97 (s, 6 H) ppm;  $^{13}\text{C}$  NMR ( $\text{CDCl}_3$ , 100 MHz)  $\delta$  = 163.0, 148.6, 137.3, 125.7, 114.7, 68.2, 60.5, 32.3, 29.8, 29.7, 29.7, 26.5, 23.1, 14.5 ppm; IR  $\nu_{\text{max}}$  (film) [ $\text{cm}^{-1}$ ]: 2912, 2847, 1759, 1742, 1591, 1604, 1219, 1176, 996, 858, 815, 623. HRMS (APPI-TOF,  $\text{M}^+$ )  $\text{C}_{60}\text{H}_{69}\text{B}_3\text{O}_9$  calc 966.5215 found 966.4987.

**(4c)** p-decyloxy discotic -  $^1\text{H}$  NMR ( $\text{CDCl}_3$ , 400 MHz)  $\delta$  = 0.92 (t,  $J$  = 6.8 Hz, 9 H), 1.26-1.40 (m, 36 H), 1.45-1.54 (m, 6 H), 1.82 (qnt,  $J$  = 8 Hz, 6 H), 3.96 (t,  $J$  = 6.4 Hz, 6 H), 6.93 (d,  $J$  = 8.4 Hz, 6 H), 7.95 (d,  $J$  = 8.4 Hz, 6 H), 8.03 (s, 6 H) ppm;  $^{13}\text{C}$  NMR ( $\text{CDCl}_3$ , 100 MHz)  $\delta$  = 162.8, 148.3, 137.1, 125.5, 114.5, 105.4, 68.1, 32.3, 30.1, 30.0, 29.9, 29.8, 29.7, 26.5, 23.1, 14.5 ppm; IR  $\nu_{\text{max}}$  (film) [ $\text{cm}^{-1}$ ]: 2911, 2850, 1759, 1740, 1590, 1603, 1222, 1177, 993, 816, 624. HRMS (APPI-TOF,  $\text{M}^+$ )  $\text{C}_{66}\text{H}_{81}\text{B}_3\text{O}_9$  calc 1050.6152 found 1050.5898.

**(4d)** p-dodecyloxy discotic -  $^1\text{H}$  NMR ( $\text{CDCl}_3$ , 400 MHz)  $\delta$  = 0.90 (t,  $J$  = 7.2 Hz, 9 H), 1.26-1.40 (m, 48 H), 1.45-1.54 (m, 6 H), 1.82 (qnt,  $J$  = 7.6 Hz, 6 H), 3.96 (t,  $J$  = 8.8 Hz, 6 H), 6.92 (d,  $J$  = 8.4 Hz, 6 H), 7.94 (d,  $J$  = 8.4 Hz, 6 H), 8.01 (s, 6 H) ppm;  $^{13}\text{C}$  NMR ( $\text{CDCl}_3$ , 100 MHz)  $\delta$  = 162.6, 148.1, 136.8, 125.3, 116.8, 114.3, 105.4, 67.8, 31.9, 29.7, 29.6, 29.6, 29.5, 29.3, 29.3, 26.0, 22.6, 14.0 ppm; IR  $\nu_{\text{max}}$  (film) [ $\text{cm}^{-1}$ ]: 2913, 2848, 1755, 1738, 1594, 1602, 1219, 1176, 996, 858, 815, 623. HRMS (APPI-TOF,  $\text{M}^+$ )  $\text{C}_{72}\text{H}_{93}\text{B}_3\text{O}_9$  calc 1134.7087 found 1134.6882.

**(4m)** p-octadecyloxy discotic -  $^1\text{H}$  NMR ( $\text{CDCl}_3$ , 400 MHz)  $\delta$  = 0.89 (t,  $J$  = 7.2 Hz, 9 H), 1.25-1.44 (m, 84 H), 1.45-1.52 (m, 6 H), 1.80 (qnt,  $J$  = 7.6 Hz, 6 H), 3.91 (t,  $J$  = 6.8 Hz, 6 H), 6.89 (d,  $J$  = 8.8 Hz, 6 H), 7.87 (d,  $J$  = 8.8 Hz, 6 H), 7.9 (s, 6 H) ppm;  $^{13}\text{C}$  NMR ( $\text{CDCl}_3$ , 100 MHz)  $\delta$  = 163.3, 148.9, 137.4, 126.0, 126.0, 114.9, 105.9, 68.4, 32.3, 30.1, 30.0, 30.0, 30.0, 29.9, 29.7, 29.7, 26.5, 23.0, 14.4 ppm; IR  $\nu_{\text{max}}$  (film) [ $\text{cm}^{-1}$ ]: 2910, 2849, 1760, 1742, 1590, 1602, 1217, 1179, 996, 858, 815, 623. HRMS (APPI-TOF,  $\text{M}^+$ )  $\text{C}_{90}\text{H}_{129}\text{B}_3\text{O}_9$  calc 1387.9900 found 1387.9525.

**(4e)** p-(3,7-dimethyloctyloxy) discotic -  $^1\text{H}$  NMR ( $\text{CDCl}_3$ , 400 MHz)  $\delta$  = 0.93 (d,  $J$  = 6.4 Hz, 18 H), 0.97 (d,  $J$  = 6.4 Hz, 9 H), 1.17-1.26 (m, 9 H), 1.30-1.42 (m, 9 H), 1.49-

1.62 (m, 6 H), 1.62-1.69 (m, 3 H), 1.74-1.83 (m, 3 H), 3.78 (t,  $J = 5.6$ , 6 H), 6.67 (d,  $J = 8.4$  Hz, 6 H), 7.56 (d,  $J = 8.0$  Hz, 6 H) ppm;  $^{13}\text{C}$  NMR ( $\text{CDCl}_3$ , 100 MHz)  $\delta = 162.6$ , 147.9, 137.0, 125.0, 116.9, 114.3, 105.0, 66.4, 39.7, 37.9, 36.6, 30.4, 28.4, 25.1, 23.1, 23.0, 20.1 ppm; IR  $\nu_{\text{max}}$  (film) [ $\text{cm}^{-1}$ ]: 2954, 2927, 2856, 1601, 1491, 1351, 1237, 1174, 1066, 832, 744. HRMS (APPI-TOF,  $\text{M}^+$ )  $\text{C}_{66}\text{H}_{81}\text{B}_3\text{O}_9$  calc 1050.6152 found 1050.5684.

(4f) p-(2-ethylhexyloxy) discotic -  $^1\text{H}$  NMR ( $\text{CDCl}_3$ , 400 MHz)  $\delta = 0.86$  (m,  $J = 7.2$  Hz, 9 H), 0.91 (t,  $J = 7.6$  Hz, 9 H), 1.29-1.31 (m, 12 H), 1.35-1.52 (m, 12 H), 1.71 (sep,  $J = 6$  Hz, 3 H), 3.83 (d,  $J_1 = 5.6$ ,  $J_2 = 1.2$  Hz, 6 H), 6.93 (d,  $J = 8.4$  Hz, 6 H), 7.95 (d,  $J = 8.4$  Hz, 6 H), 8.08 (s, 6 H) ppm;  $^{13}\text{C}$  NMR ( $\text{CDCl}_3$ , 100 MHz)  $\delta = 163.0$ , 148.4, 137.0, 125.5, 114.4, 105.5, 70.4, 39.3, 30.5, 29.1, 23.8, 23.1, 14.1, 11.1 ppm; IR  $\nu_{\text{max}}$  (film) [ $\text{cm}^{-1}$ ]: 2959, 2922, 2851, 1604, 1492, 1355, 1239, 1175, 1065, 831, 731. HRMS (APPI,  $\text{M}^+$ )  $\text{C}_{60}\text{H}_{69}\text{B}_3\text{O}_9$  calc 966.5215 found 966.5004.

**General synthesis for 3,5-substituted triphenylene catechol boronate discotics-** 3,5-bisdodecyloxybenzene boronic acid (1.818 g, 4.20 mmol) and hexahydroxytriphenylene (0.380 g, 1.05 mmol) were dissolved in 60 mL of acetonitrile and refluxed for 12 hours or until the product precipitated out of solution. The product was then obtained by vacuum filtration, and purified by passing through a celite pad with chloroform then precipitated with acetonitrile resulting in 0.123 g of an off-white solid obtained with 77% yield.

(4g) 3,5- bishexyloxy discotic -  $^1\text{H}$  NMR ( $\text{CDCl}_3$ , 400 MHz)  $\delta = 0.89$  (t,  $J = 7.2$  Hz, 18 H), 1.29-1.36 (m, 24 H), 1.40-1.47 (m, 12 H), 1.75 (qnt,  $J = 7.6$  Hz, 12 H), 3.87 (t,  $J = 6.8$  Hz, 2 H), 6.49 (t,  $J = 2$  Hz, 3 H), 7.00 (d,  $J = 2$  Hz, 6 H), 7.93 (s, 6 H) ppm;  $^{13}\text{C}$  NMR ( $\text{CDCl}_3$ , 100 MHz)  $\delta = 160.1$ , 148.1, 125.4, 112.4, 106.3, 105.5, 68.1, 31.7, 29.4, 25.8, 22.7, 14.1 ppm; IR  $\nu_{\text{max}}$  (film) [ $\text{cm}^{-1}$ ]: 2927, 2856, 1589, 1491, 1353, 1240, 1158, 1054, 974, 834, 690. HRMS (APPI-TOF,  $\text{M}^+$ )  $\text{C}_{72}\text{H}_{93}\text{B}_3\text{O}_{12}$  calc 1182.6938 found 389.2594.

(4h) 3,5- bisoctyloxy discotic -  $^1\text{H}$  NMR ( $\text{CDCl}_3$ , 400 MHz)  $\delta = 0.89$  (t,  $J = 7.2$  Hz, 18 H), 1.30-1.45 (m, 48 H), 1.45-1.57 (m, 12 H), 1.82 (qnt,  $J = 7.6$  Hz, 12 H), 3.95 (t,  $J = 6.8$  Hz, 2 H), 6.55 (t,  $J = 2$  Hz, 3 H), 7.06 (d,  $J = 2$  Hz, 6 H), 7.99 (s, 6 H) ppm;  $^{13}\text{C}$  NMR ( $\text{CDCl}_3$ , 100 MHz)  $\delta = 159.7$ , 147.4, 126.0, 124.8, 111.9, 105.9, 104.8, 67.8, 32.0, 29.7, 29.5, 29.4, 26.1, 22.7, 14.1 ppm; IR  $\nu_{\text{max}}$  (film) [ $\text{cm}^{-1}$ ]: 2919, 2848, 1587, 1493, 1356, 1239, 1156, 1049, 976, 833, 693. HRMS (APPI-TOF,  $\text{M}^+$ )  $\text{C}_{84}\text{H}_{117}\text{B}_3\text{O}_{12}$  calc 1350.8811 found 389.2594.

(4i) 3,5- bisdecyloxy discotic -  $^1\text{H}$  NMR ( $\text{CDCl}_3$ , 400 MHz)  $\delta = 0.86$  (t,  $J = 7.2$  Hz, 18 H), 1.20-1.35 (m, 72 H), 1.35-1.45 (m, 12 H), 1.71 (qnt,  $J = 7.6$  Hz, 12 H), 3.77 (t,  $J = 6.8$  Hz, 2 H), 6.37 (t,  $J = 1.6$  Hz, 2 H), 6.85 (d,  $J = 1.6$  Hz, 2 H), 7.67 (s, 6 H) ppm;  $^{13}\text{C}$  NMR ( $\text{CDCl}_3$ , 100 MHz)  $\delta = 160.3$ , 148.2, 126.6, 125.5, 112.6, 106.5, 105.5, 68.3, 32.3, 30.1, 30.1, 30.0, 29.9, 29.8, 26.5, 23.1, 14.5 ppm; IR  $\nu_{\text{max}}$  (film) [ $\text{cm}^{-1}$ ]: 2914, 2843, 1588, 1490, 1357, 1241, 1165, 1051, 976, 832, 691. HRMS (APPI-TOF,  $\text{M}^+$ )  $\text{C}_{96}\text{H}_{141}\text{B}_3\text{O}_{12}$  calc 1519.0686 found.

(4j) 3,5- bisdodecyloxy discotic -  $^1\text{H}$  NMR ( $\text{CDCl}_3$ , 400 MHz)  $\delta = 0.83$  (t,  $J = 6.4$  Hz, 18 H), 1.29-1.36 (m, 100 H), 1.40-1.47 (m, 12 H), 1.74 (qnt,  $J = 7.2$  Hz, 12 H), 3.81 (t,  $J =$



6.4 Hz, 12 H), 6.45 (t,  $J = 2.4$  Hz, 3 H), 6.96 (d,  $J = 2$  Hz, 6 H), 7.85 (s, 6 H) ppm;  $^{13}\text{C}$  NMR ( $\text{CDCl}_3$ , 100 MHz)  $\delta = 159.0, 146.9, 124.2, 111.3, 110.4, 105.2, 104.3, 67.0, 28.8, 28.8, 28.7, 28.7, 28.5, 28.4, 25.2, 21.7, 13.1$  ppm; IR  $\nu_{\text{max}}$  (film) [ $\text{cm}^{-1}$ ]: 2914, 2851, 2591, 2430, 1578, 1353, 1234, 1121, 1004, 973, 825, 640. HRMS (APPI-TOF,  $\text{M}^+$ )  $\text{C}_{108}\text{H}_{165}\text{B}_3\text{O}_{12}$  calc 1687.2561 found 389.2594.

(**4k**) 3,5- bis(3,7-dimetyloctyloxy) discotic -  $^1\text{H}$  NMR ( $\text{CDCl}_3$ , 400 MHz)  $\delta = 0.71$  (d,  $J = 6.8$  Hz, 36 H), 0.75 (d,  $J = 6.4$ , 18 H), 0.9-1.01 (m, 18 H), 1.06-1.20 (m, 18 H), 1.27-1.43 (m, 12 H), 1.45-1.52 (6 H), 1.63-1.71 (m, 6 H), 3.65-3.69 (m, 12 H), 6.54 (d,  $J = 2$  Hz, 2 H), 6.87 (s, 6 H), 7.11 (d,  $J = 2$  Hz, 2 H) ppm;  $^{13}\text{C}$  NMR ( $\text{CDCl}_3$ , 100 MHz)  $\delta = 160.4, 148.4, 126.8, 125.7, 112.7, 106.6, 105.7, 66.8, 39.7, 37.8, 36.8, 30.4, 28.4, 25.1, 23.1, 23.0, 20.1$  ppm; IR  $\nu_{\text{max}}$  (film) [ $\text{cm}^{-1}$ ]: 2953, 2927, 2868, 1588, 1360, 1239, 1157, 1054, 975, 894, 833, 695. HRMS (APPI-TOF,  $\text{M}^+$ )  $\text{C}_{96}\text{H}_{141}\text{B}_3\text{O}_{12}$  calc 1519.0686 found 1519.0372.

(**4l**) 3,5- bis(2-ethylhexyloxy) discotic -  $^1\text{H}$  NMR ( $\text{CDCl}_3$ , 400 MHz)  $\delta = 0.91$ -1.01 (m, 36 H), 1.35-1.43 (m, 24 H), 1.46-1.61 (m, 24 H), 1.73-1.78 (m, 6 H), 3.86-3.91 (m, 12 H), 6.63 (s, 3 H), 7.08 (s, 6 H), 8.02 (s, 6 H) ppm;  $^{13}\text{C}$  NMR ( $\text{CDCl}_3$ , 100 MHz)  $\delta = 160.8, 148.6, 126.9, 125.9, 112.8, 106.7, 106.0, 71.0, 38.8, 30.9, 29.5, 24.2, 23.5, 14.5, 11.5$  ppm; IR  $\nu_{\text{max}}$  (film) [ $\text{cm}^{-1}$ ]: 2958, 2926, 2857, 1584, 1426, 1352, 1236, 1157, 1052, 891, 831, 692. HRMS (APPI-TOF,  $\text{M}^+$ )  $\text{C}_{84}\text{H}_{117}\text{B}_3\text{O}_{12}$  calc 1350.8811 found 389.2594.

## Electrochemistry

The following procedure was used to purify THF. First, THF was distilled over sodium with benzophenone under nitrogen environment. The distillate (60 ml) was collected with a cleaned, dried syringe and was transferred to the round-bottomed flask of the distillation apparatus. Next, 1.0 M Lithium aluminum hydride in THF (6 ml) was added to the same round-bottomed flask. This solution was distilled under argon atmosphere. The purified THF was used for the electrochemical studies. In this case, a three-electrode system was used where the working electrode was a Pt disc electrode ( $d = 0.134$  cm). A Ag quasi reference electrode was used as the reference. The counter electrode was a platinum coil.

First, cyclic voltammograms (CVs) were run for the blank, which is tetrabutylammonium tetrafluoroborate (0.1 M) in THF. Next CVs were run for the DLC in the blank. Finally CVs were taken for Ferrocene in sample for the calibration.

### Compound **4c** CV

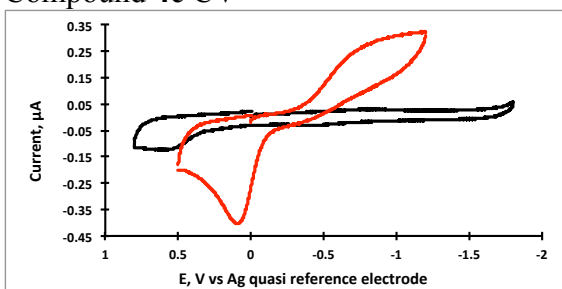

### Compound **4k** CV

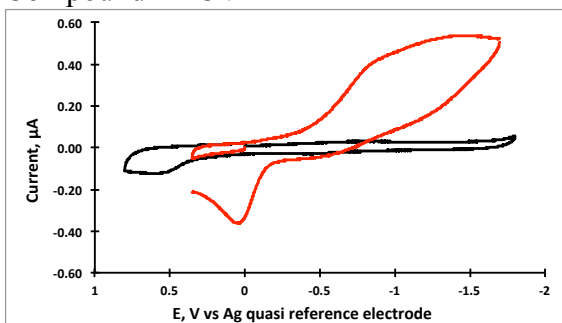

### Compound **5** CV

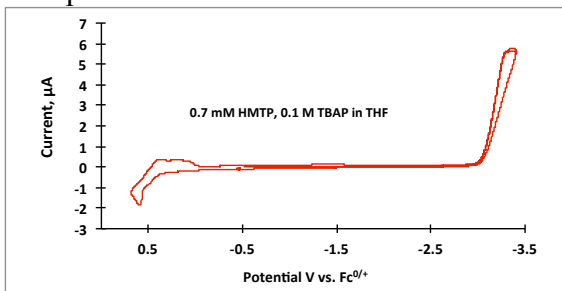

**Spectra-NMR**  
p-hexyloxybromobenzene

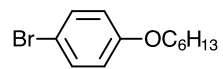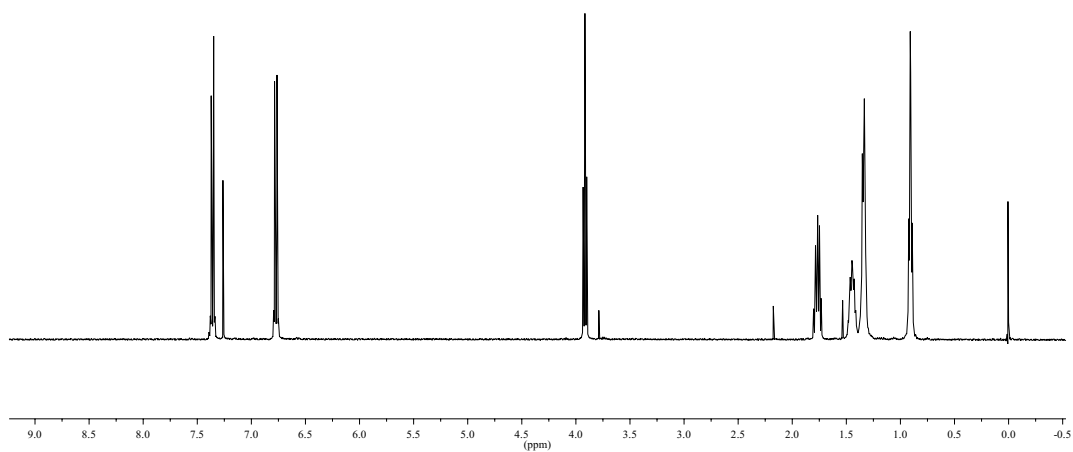

p-octyloxybromobenzene

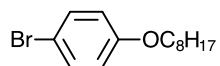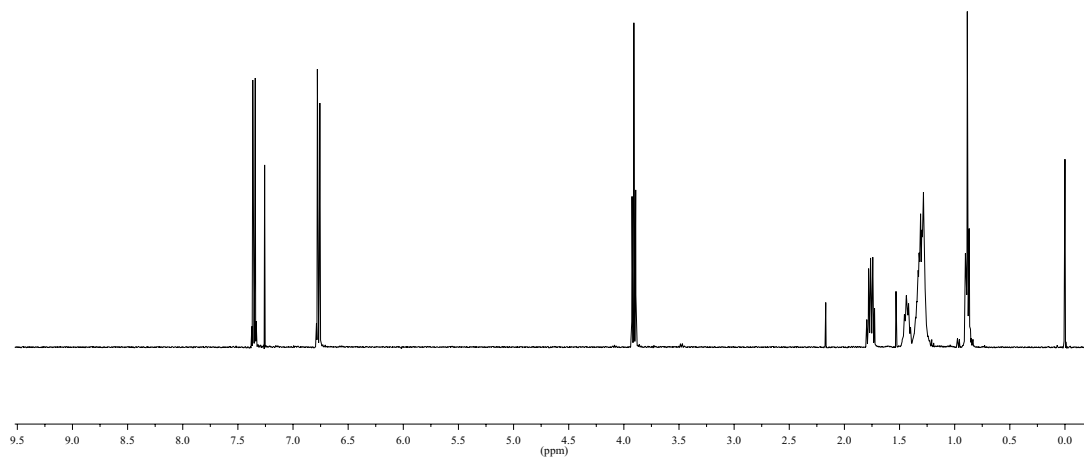

### p-decyloxybromobenzene

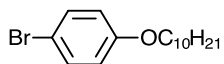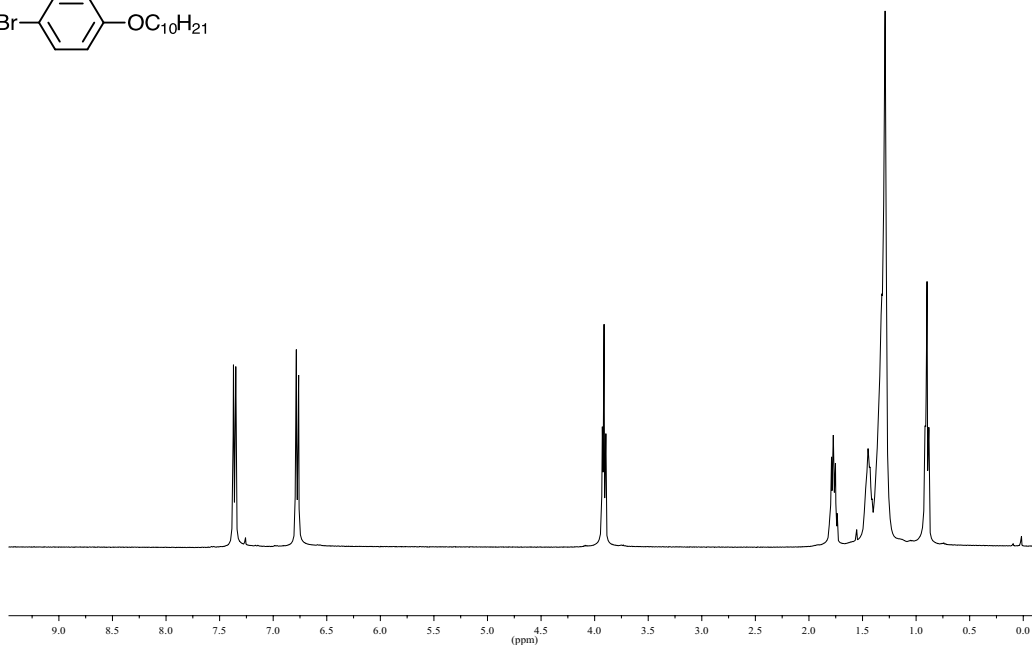

### p-dodecyloxybromobenzene

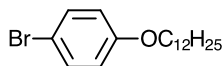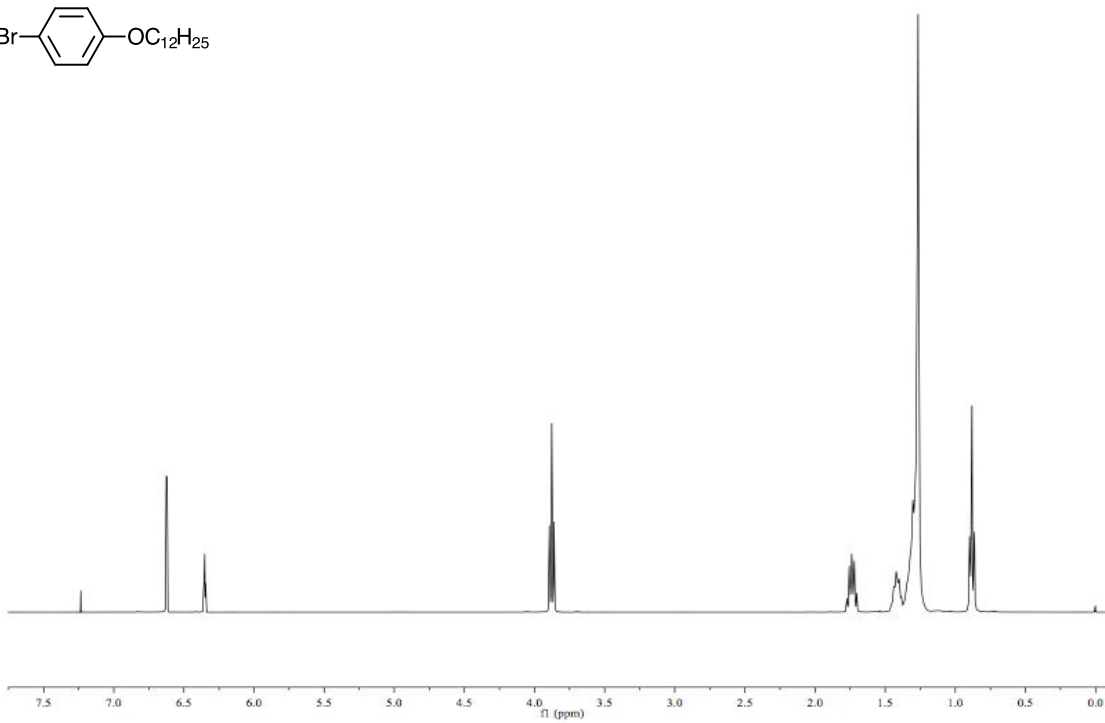

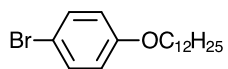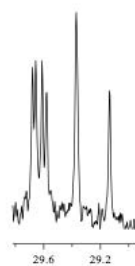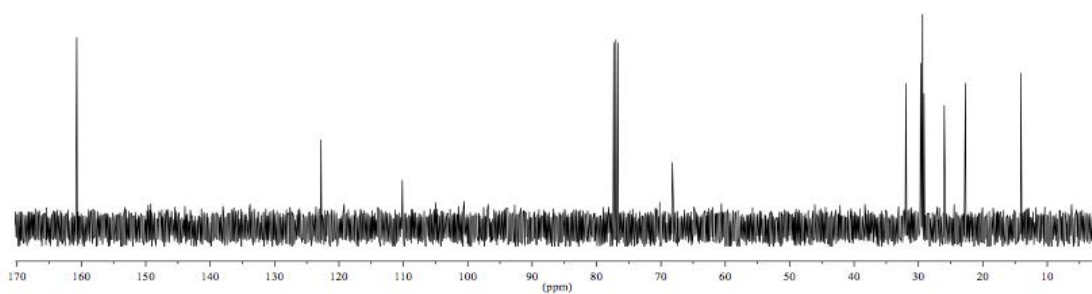

p-3,7-dimethyloctyloxybromobenzene

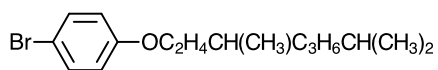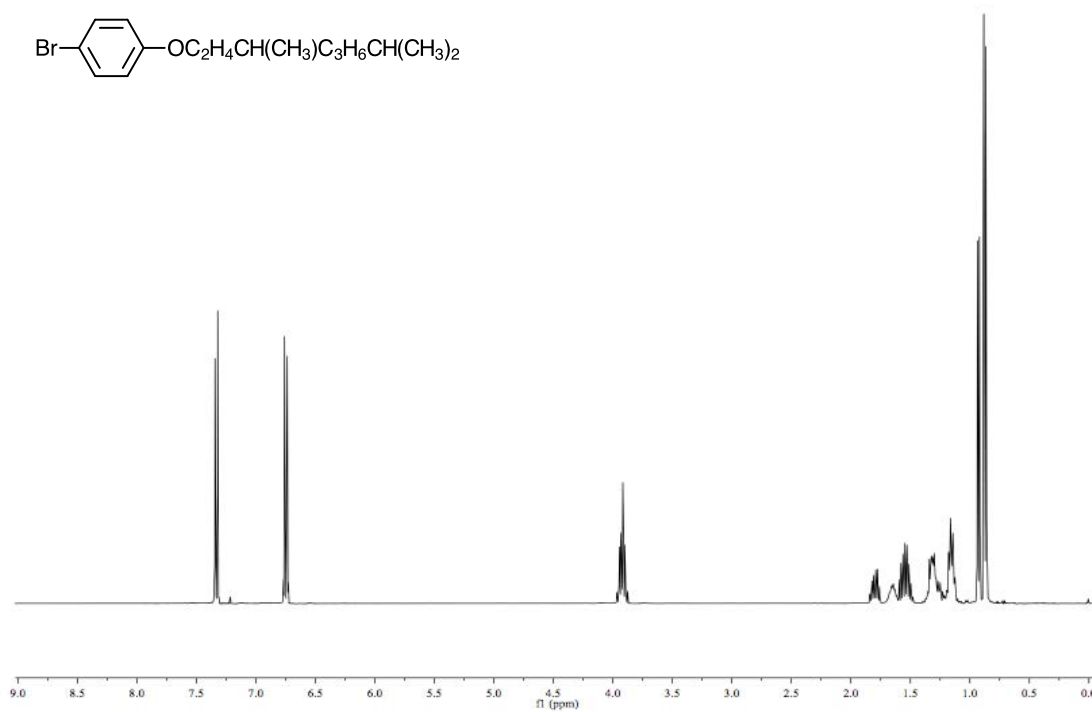

p-2-ethylhexyloxybromobenzene

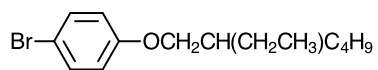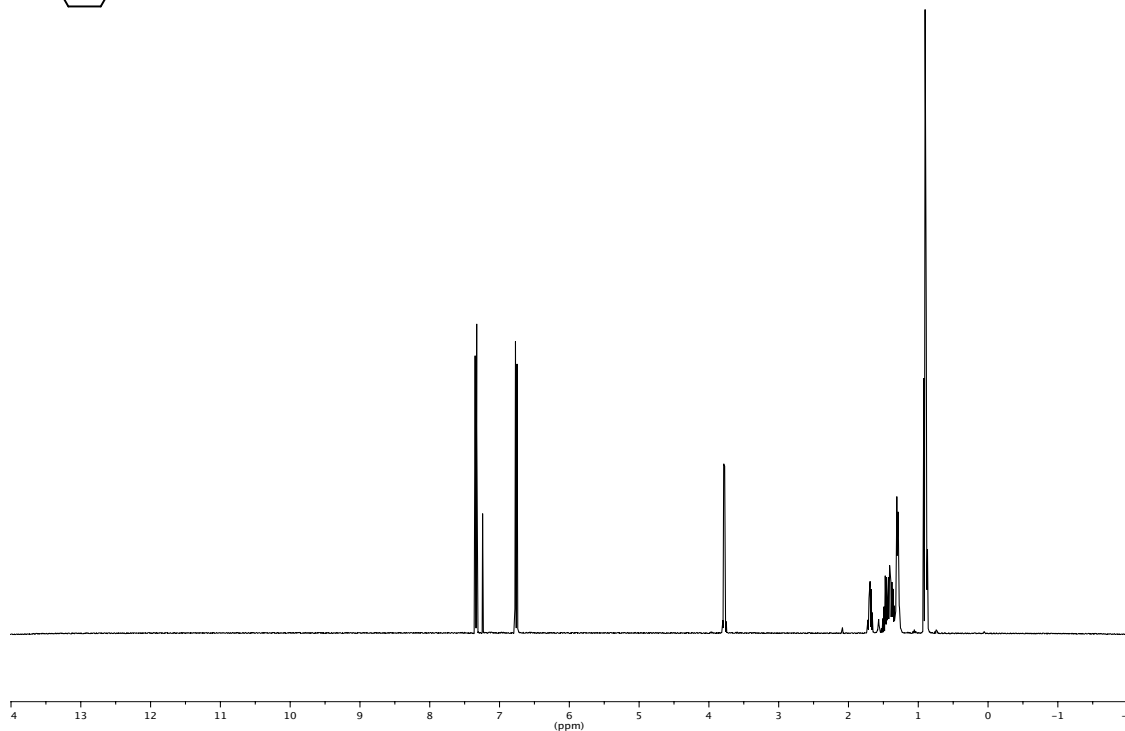

3,5-dihexyloxybromobenzene

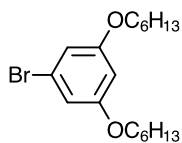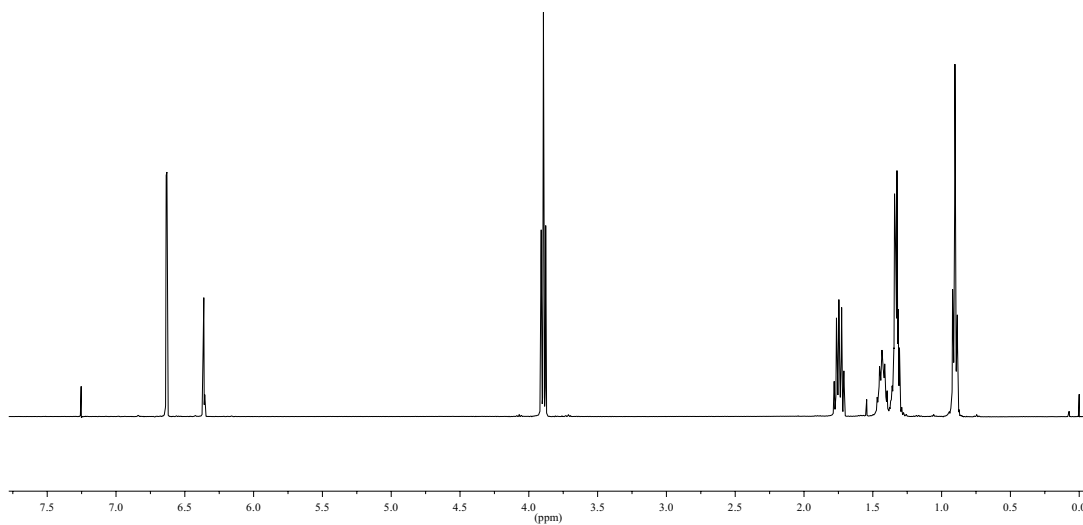

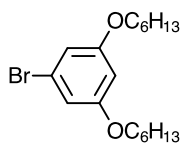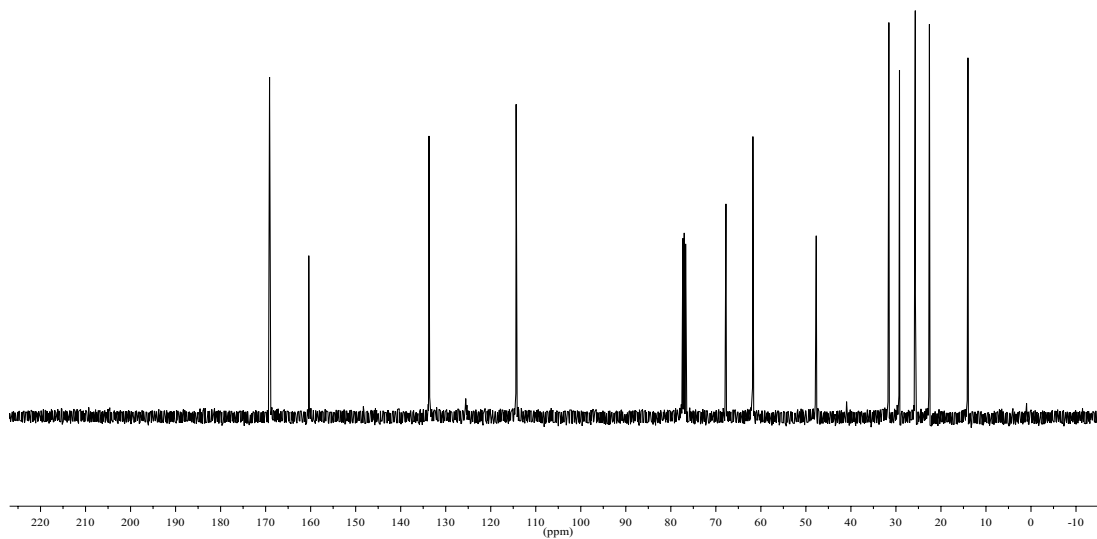

### 3,5-octyloxybromobenzene

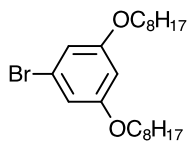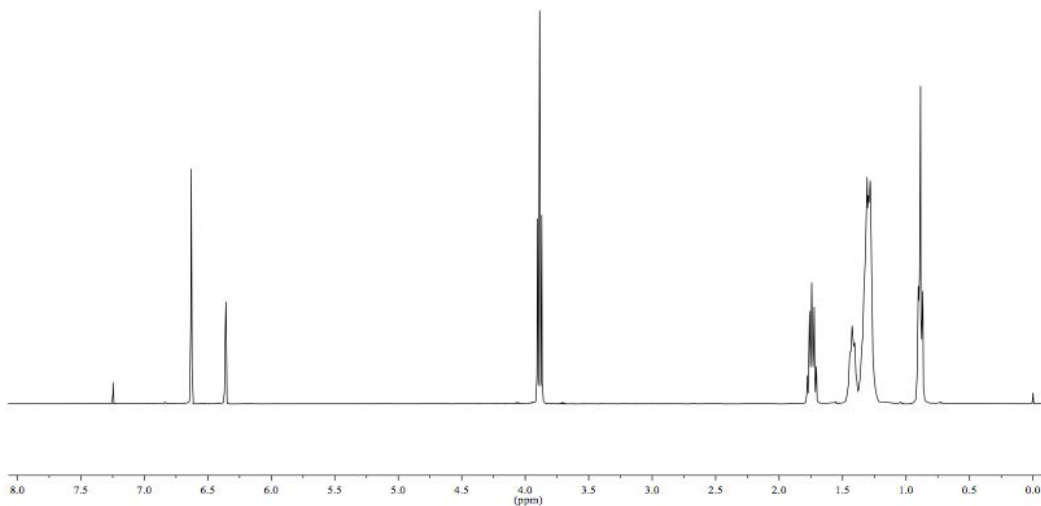

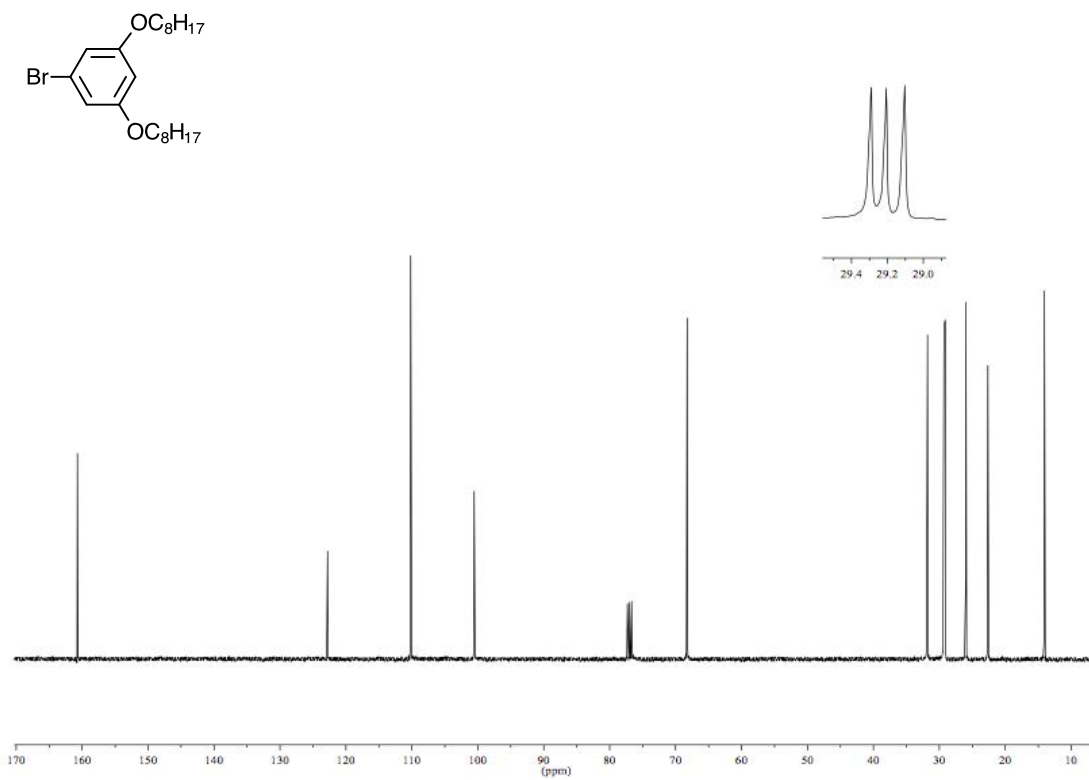

### 3,5-didecyloxybromobenzene

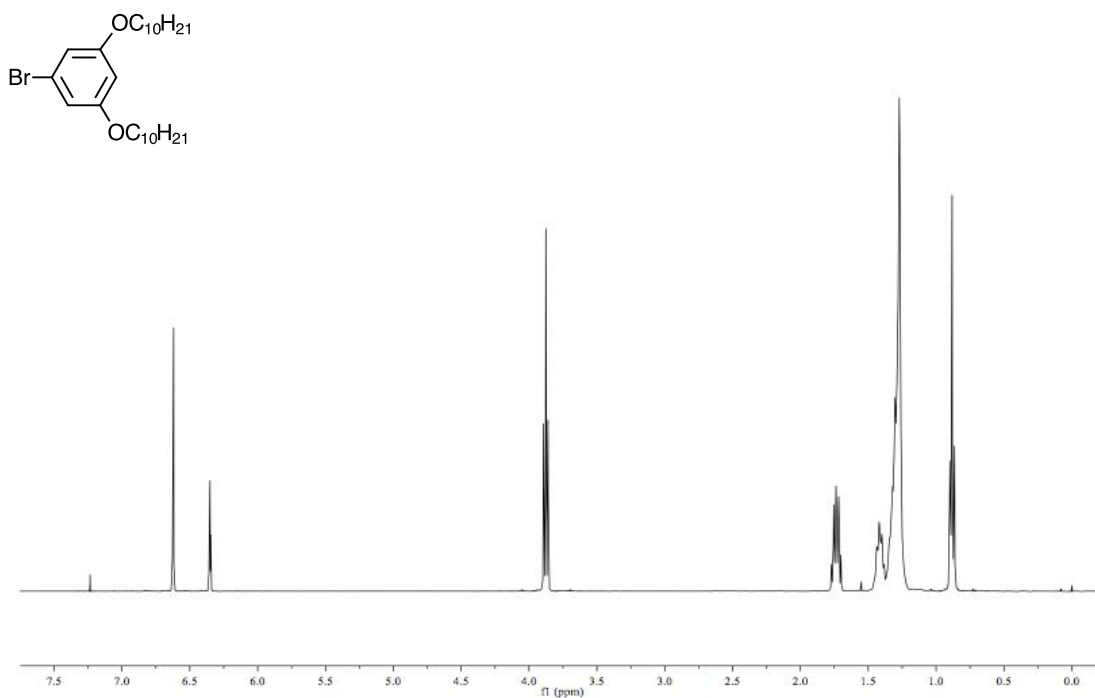



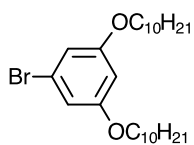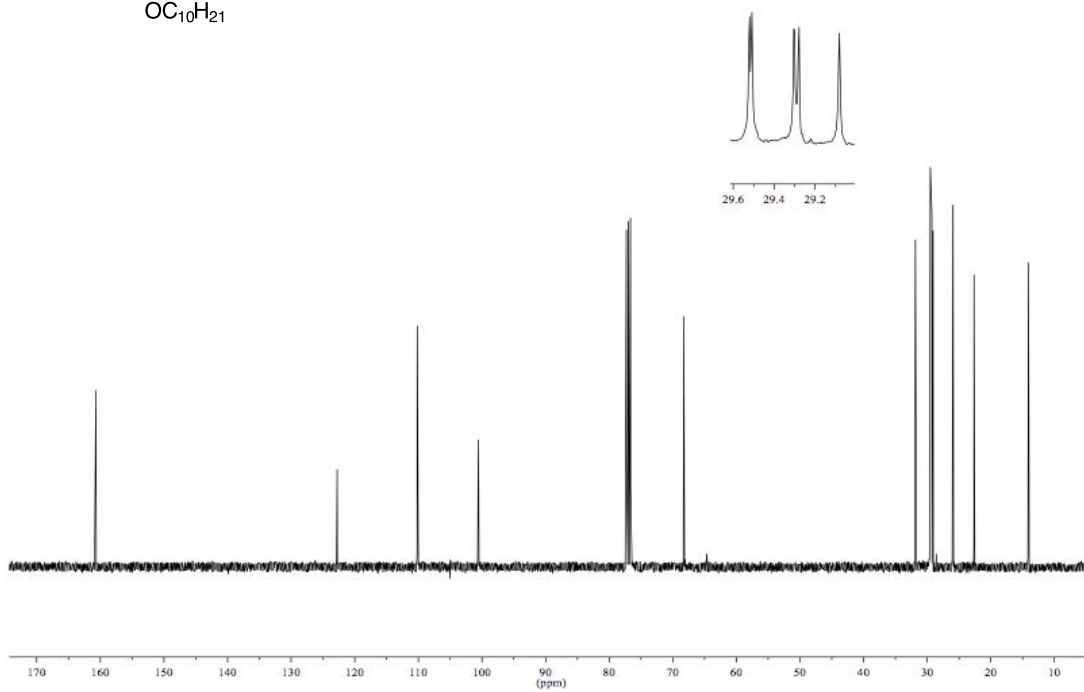

### 3,5-di(3,7-dimethyloctyloxy)bromobenzene

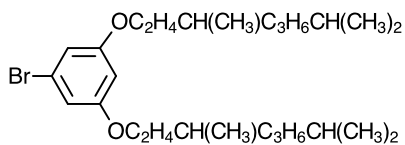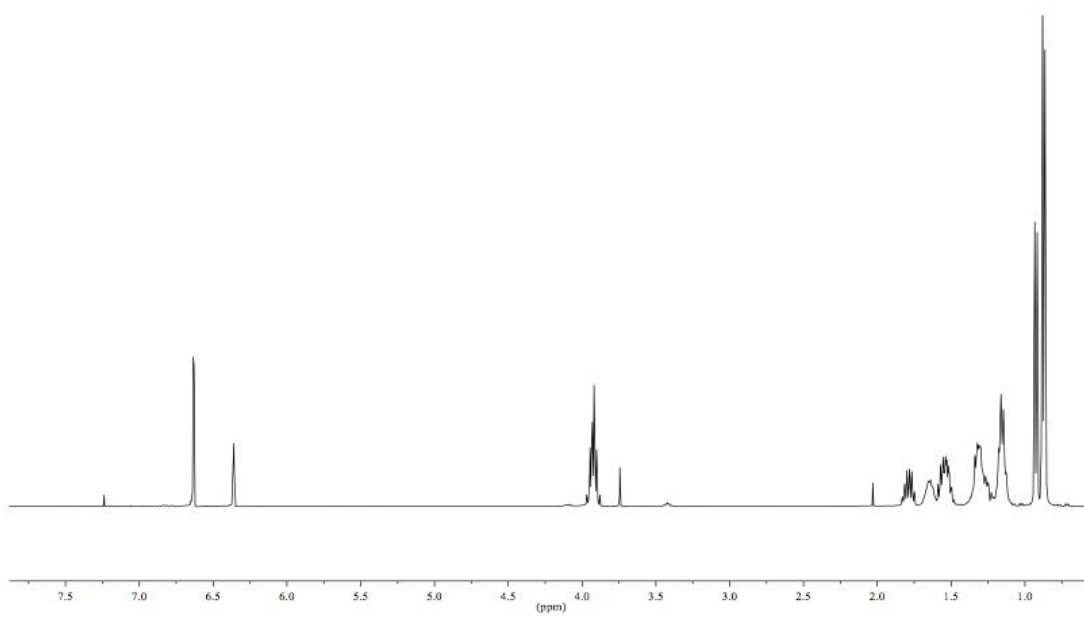

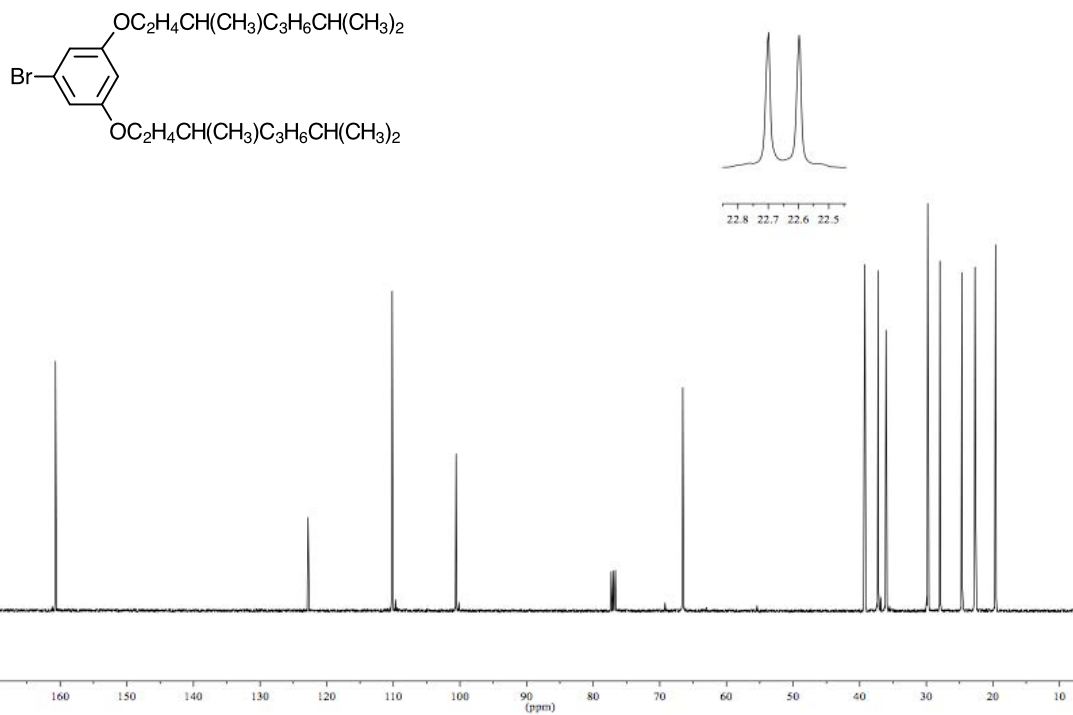

### 3,5-di(2-ethylhexyloxy)bromobenzene

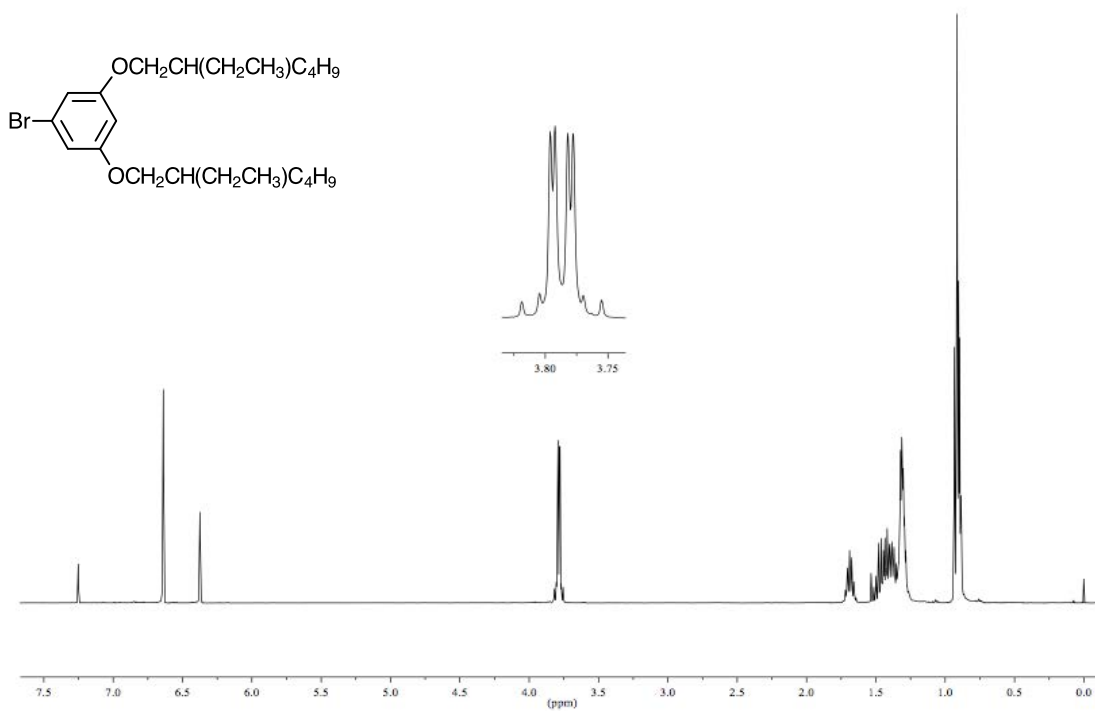

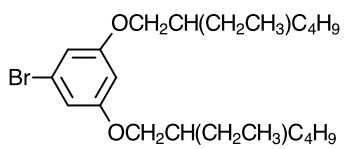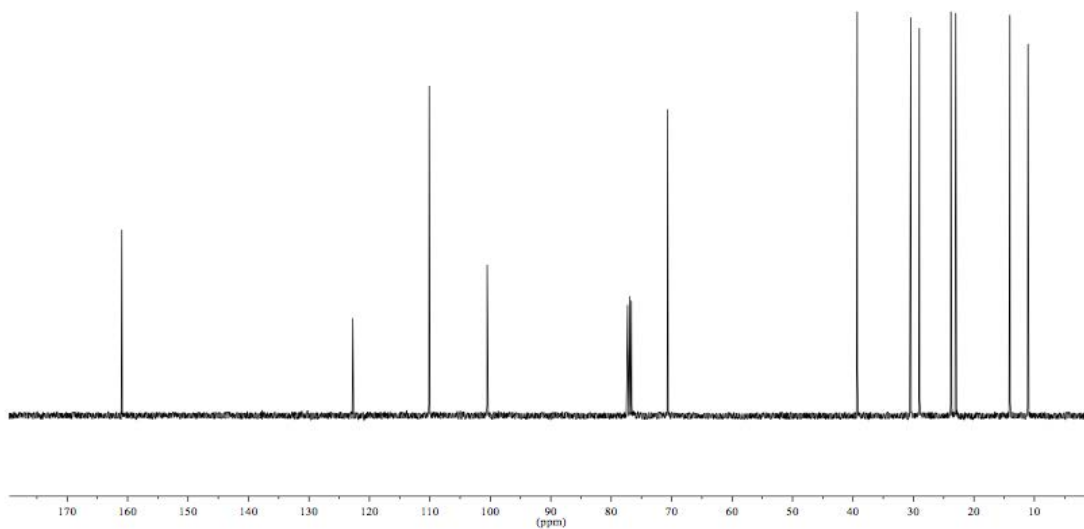

### MIDA protected benzene boronic esters p-hexyloxy MIDA

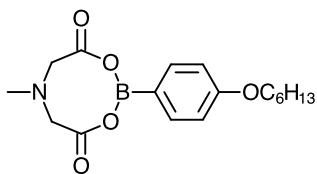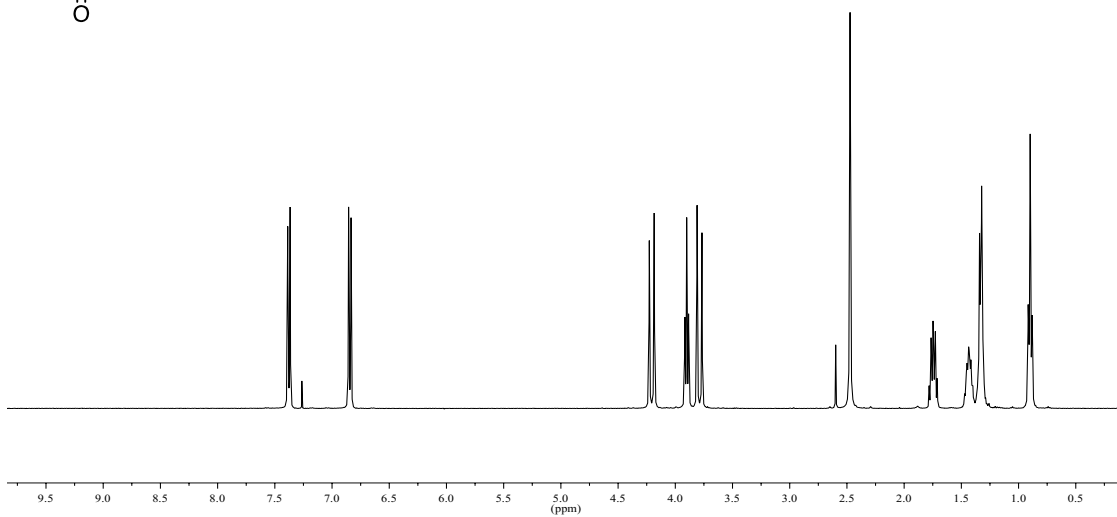

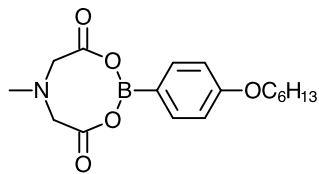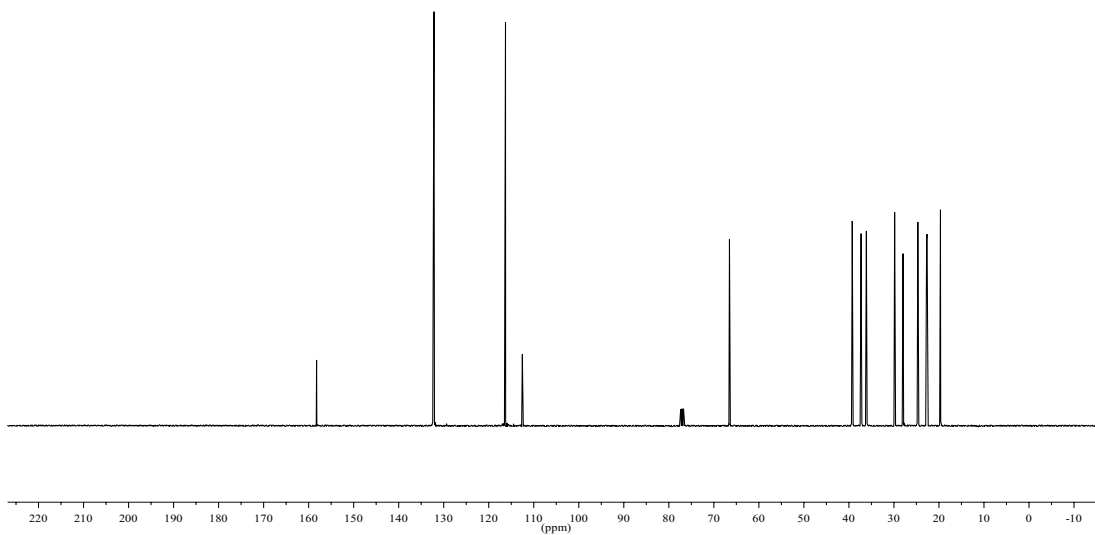

### p-octyloxy MIDA

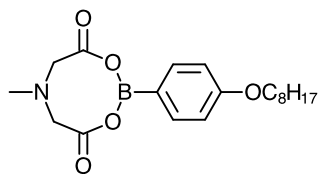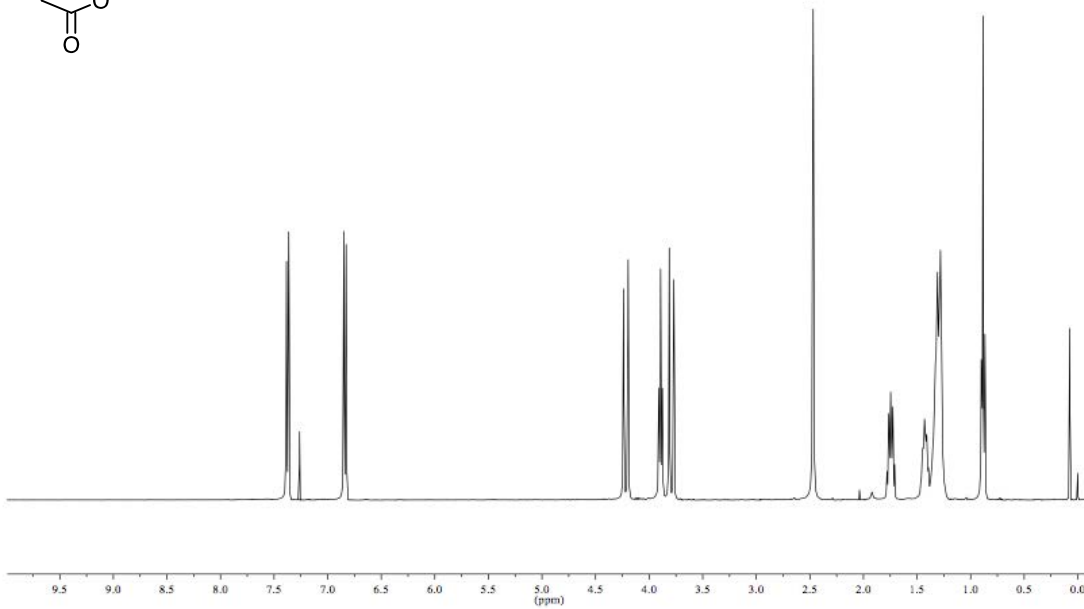

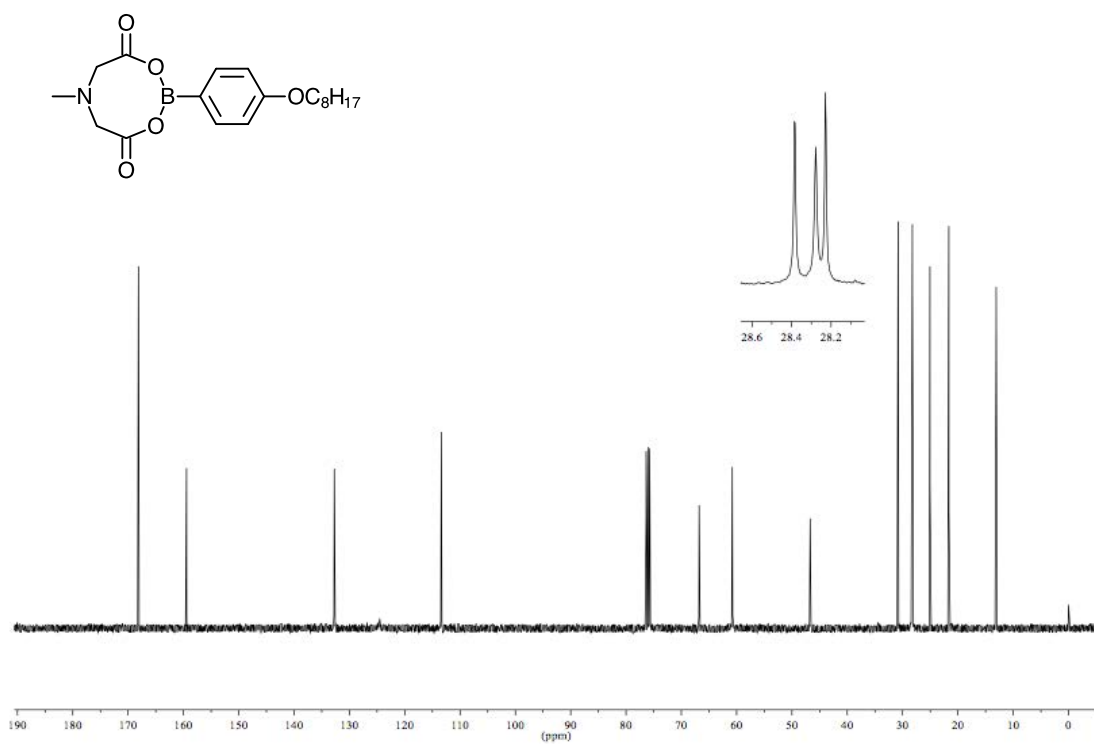

p-decyloxy MIDA

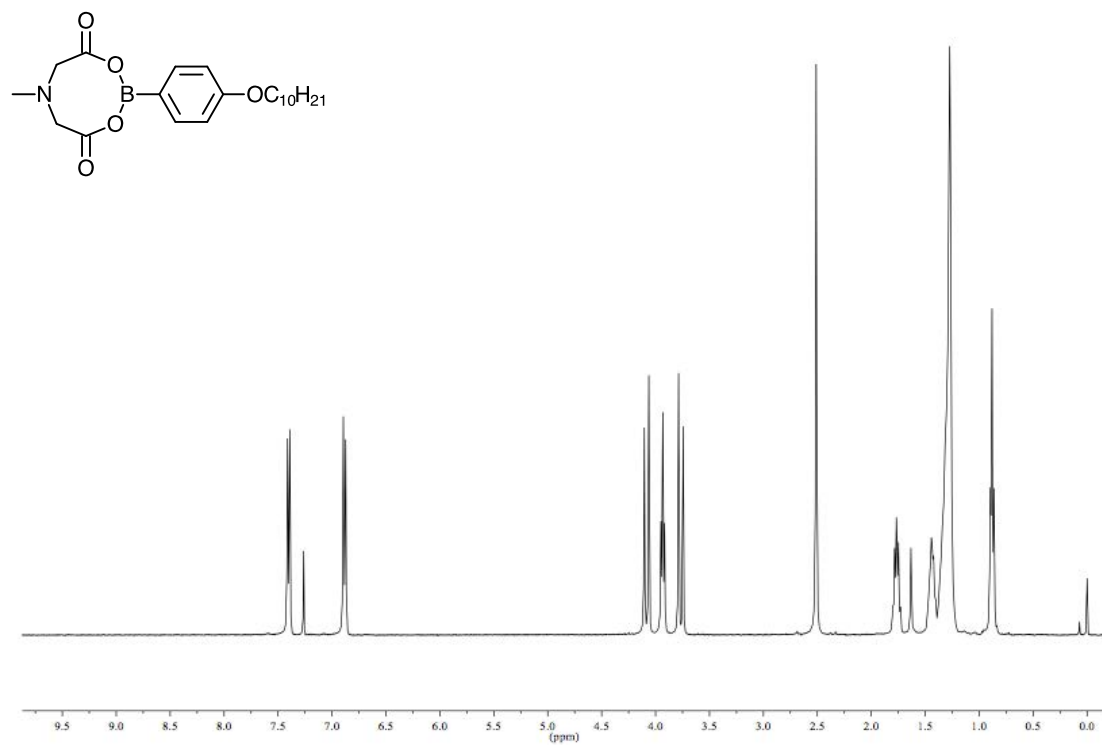

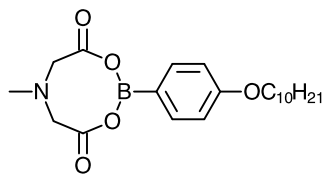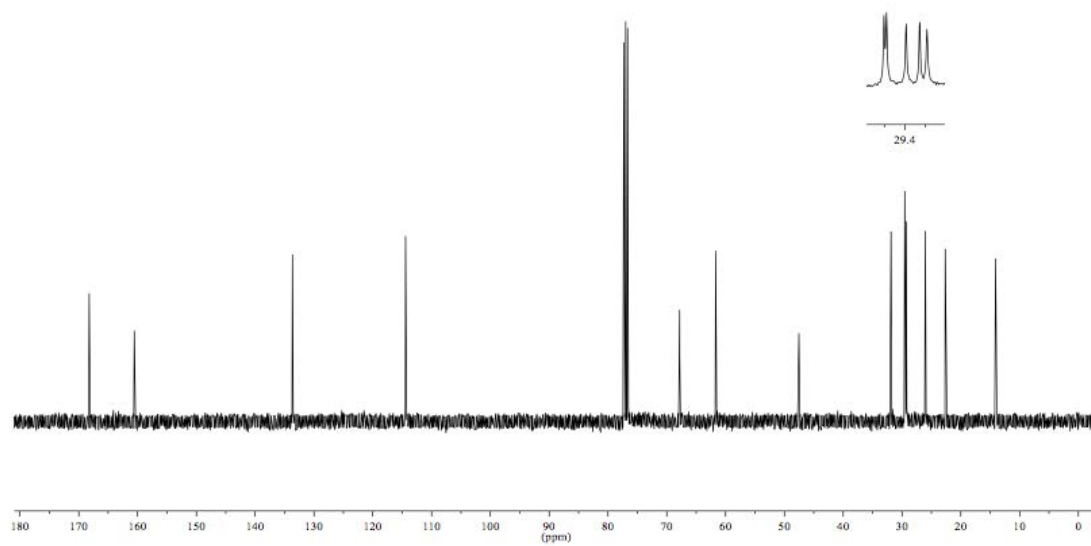

p-dodecyloxy MIDA

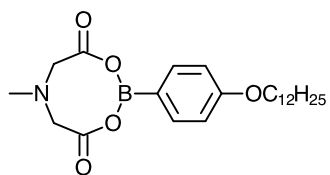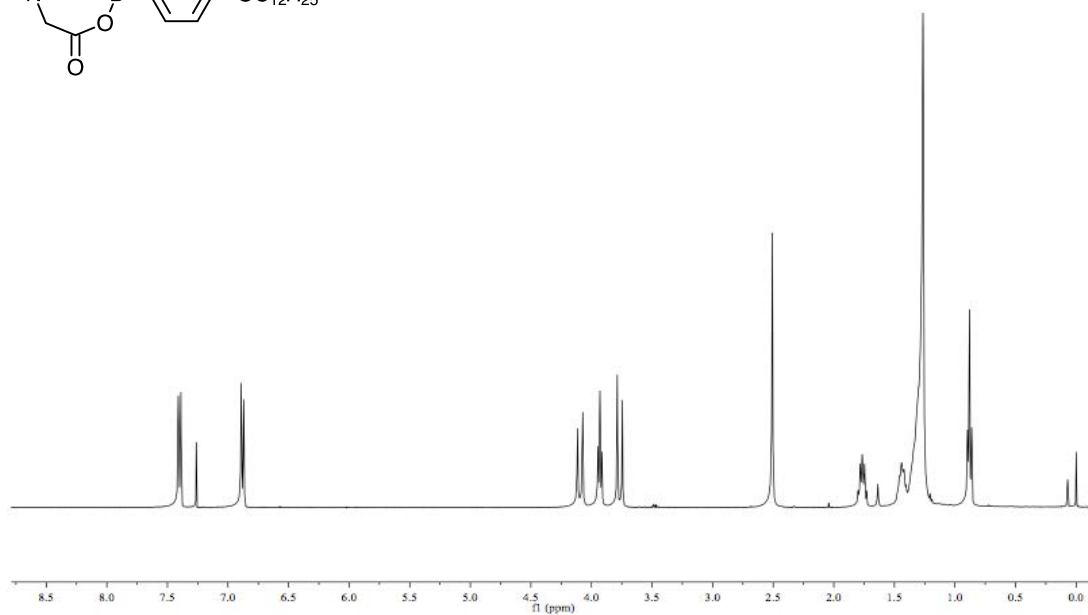

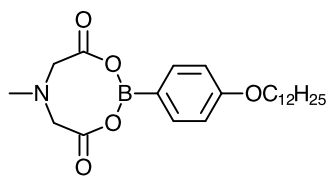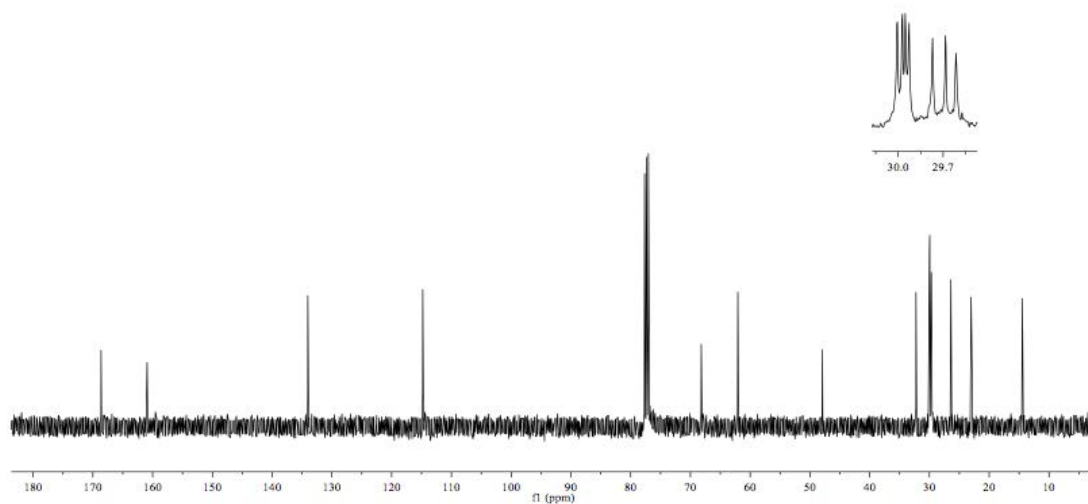

p-3,7-dimethyl octyloxy MIDA

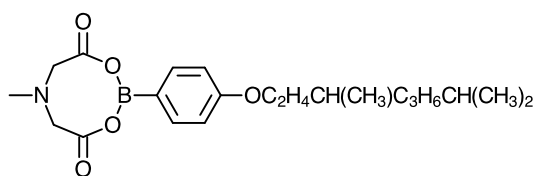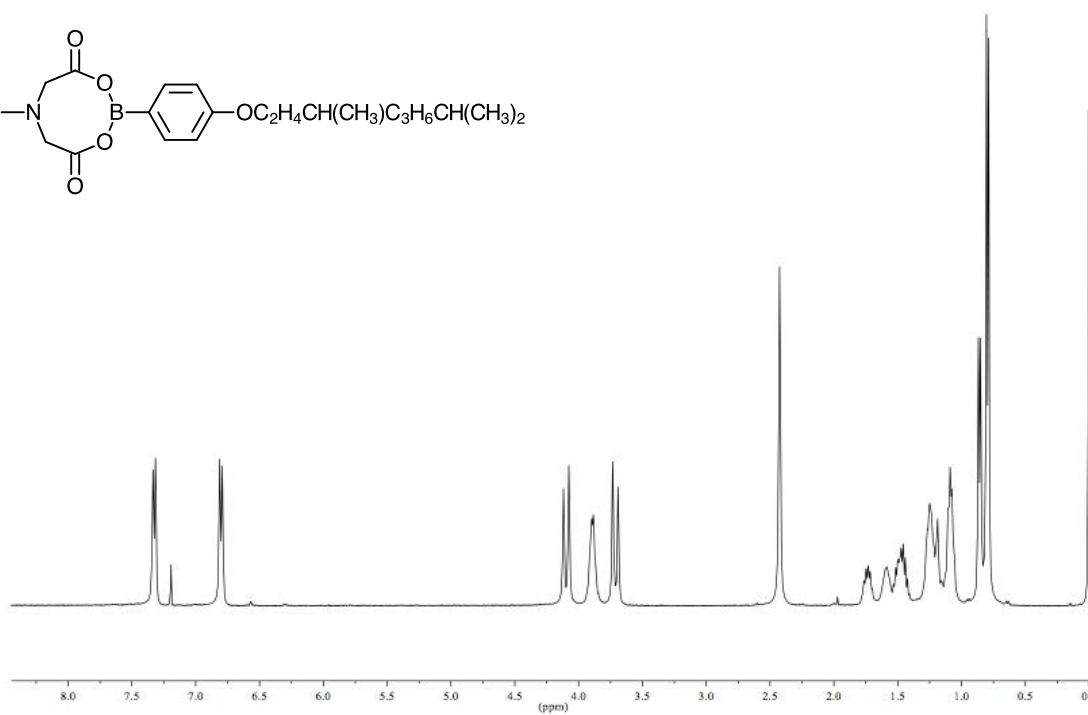

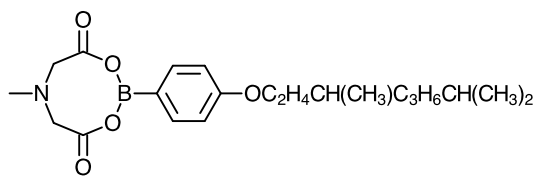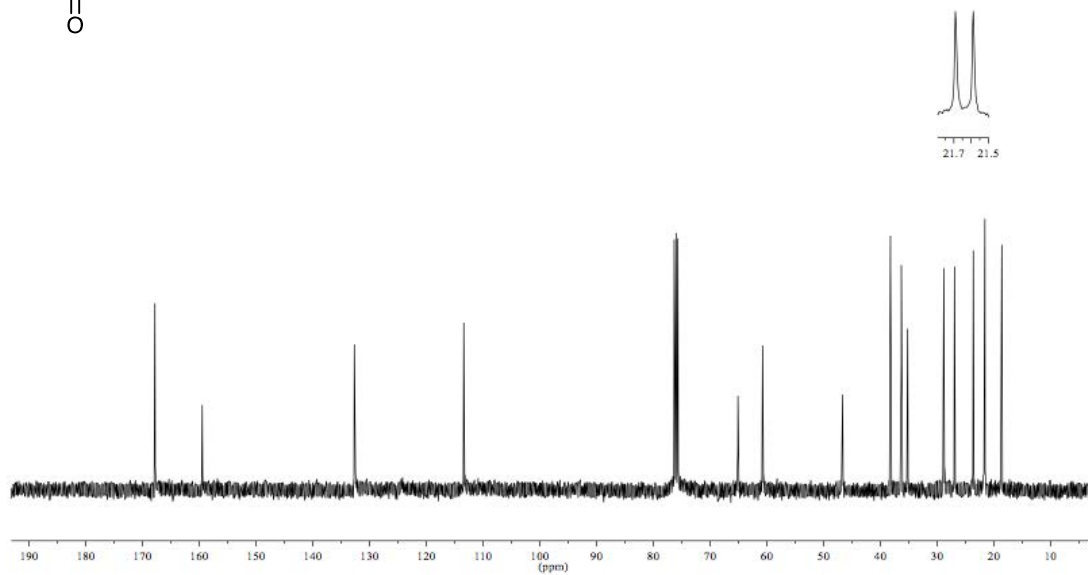

p-2-ethylhexyloxy MIDA

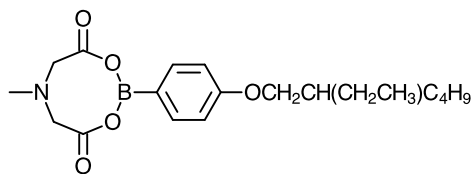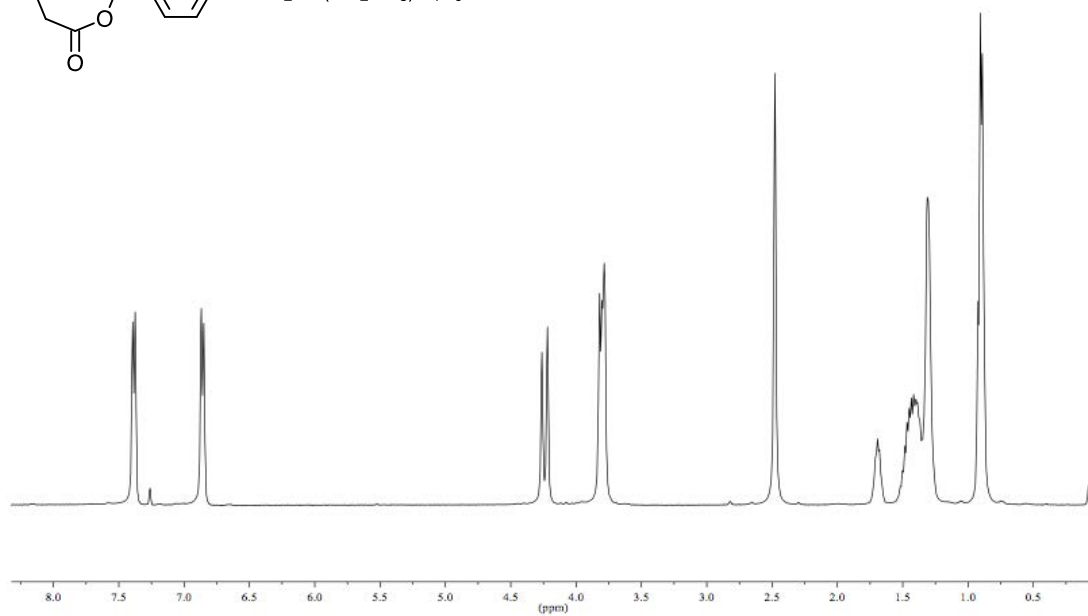



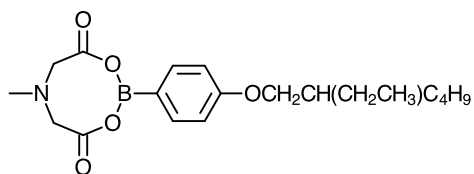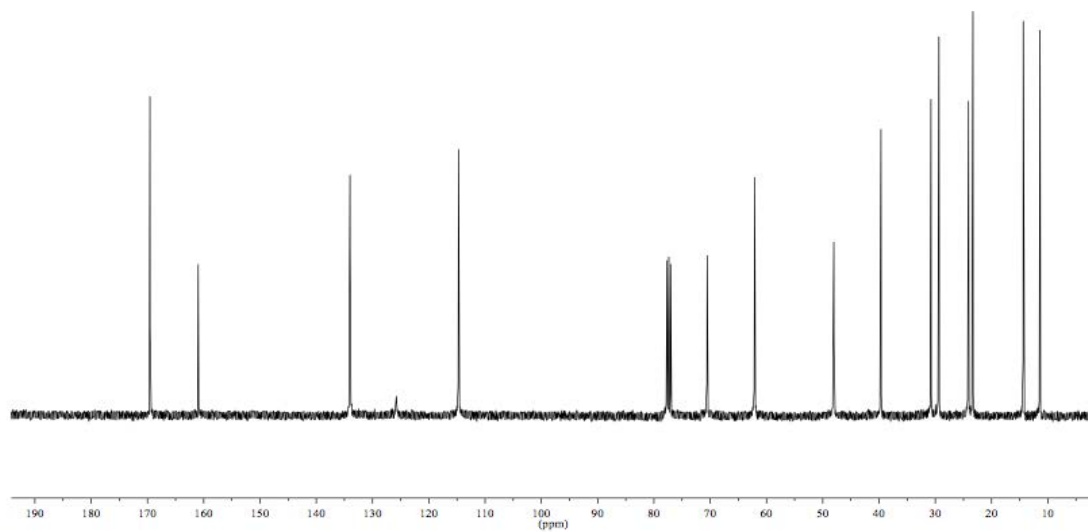

### 3,5-dihexyloxy MIDA

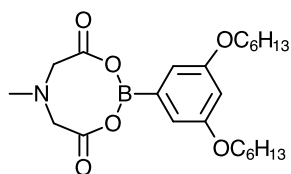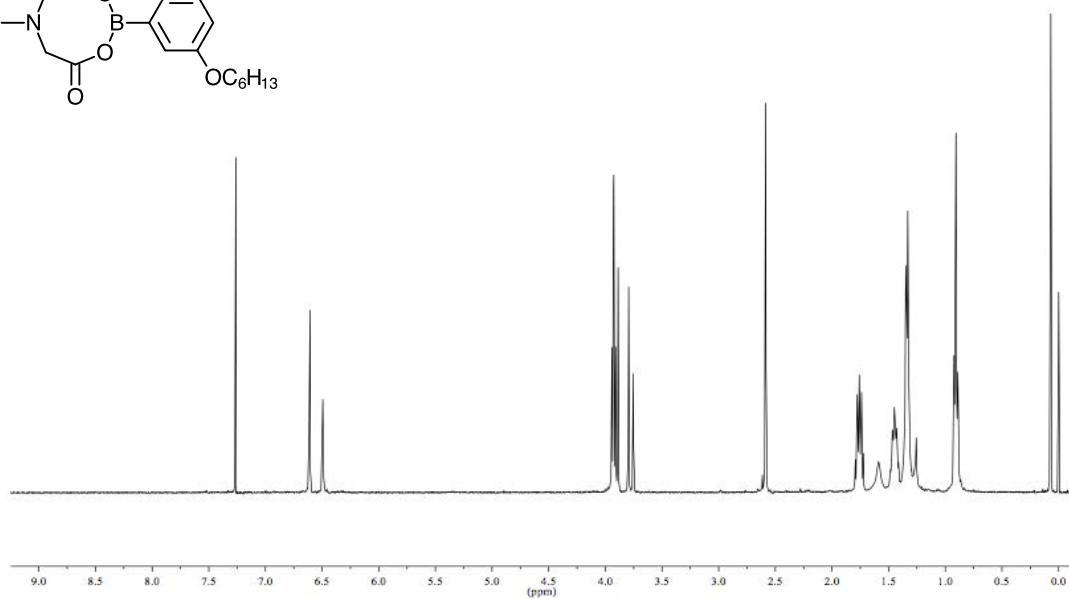

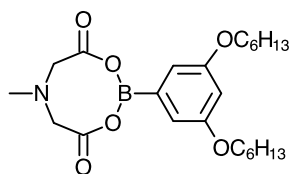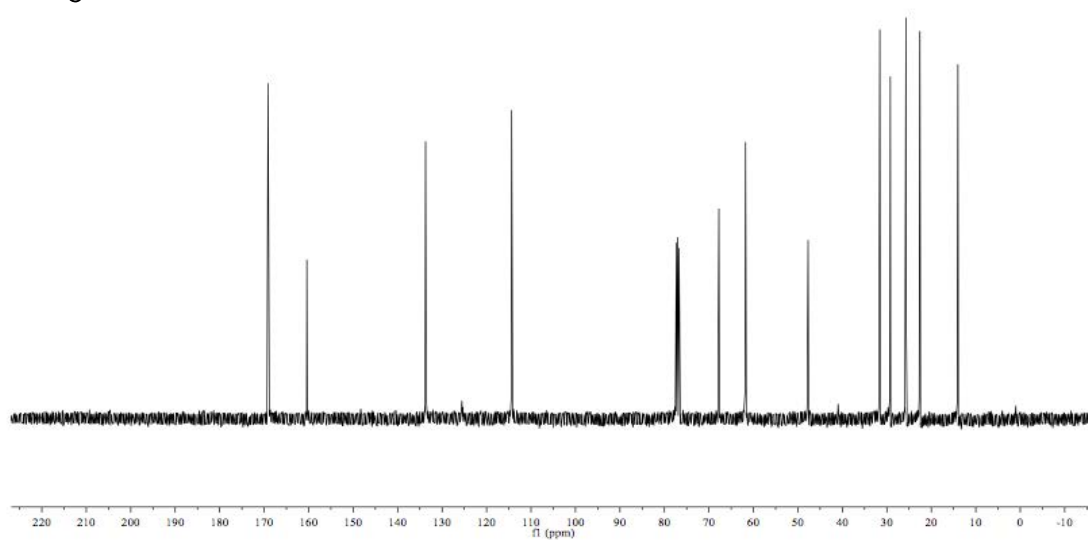

3,5-dioctyloxy MIDA

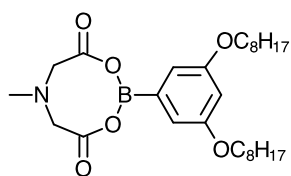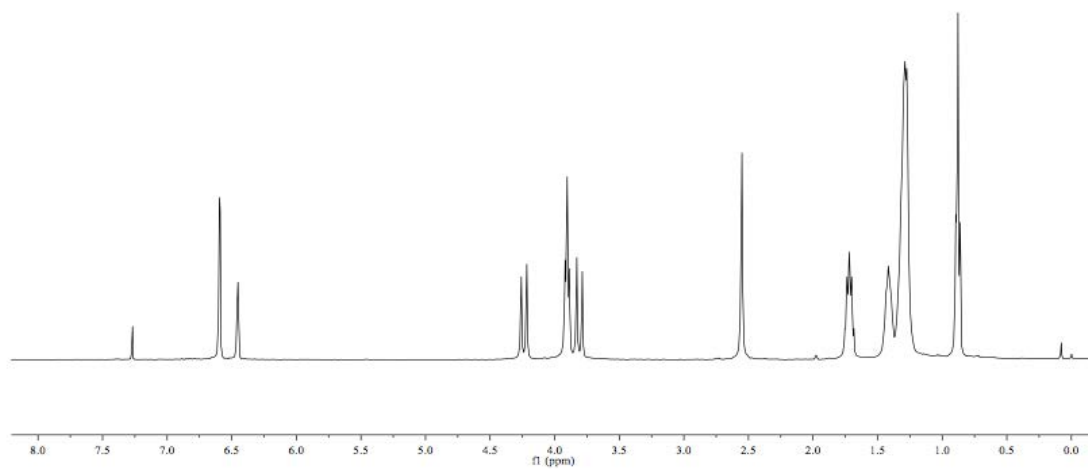

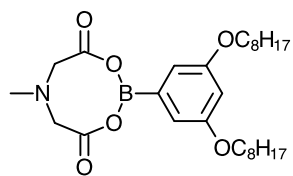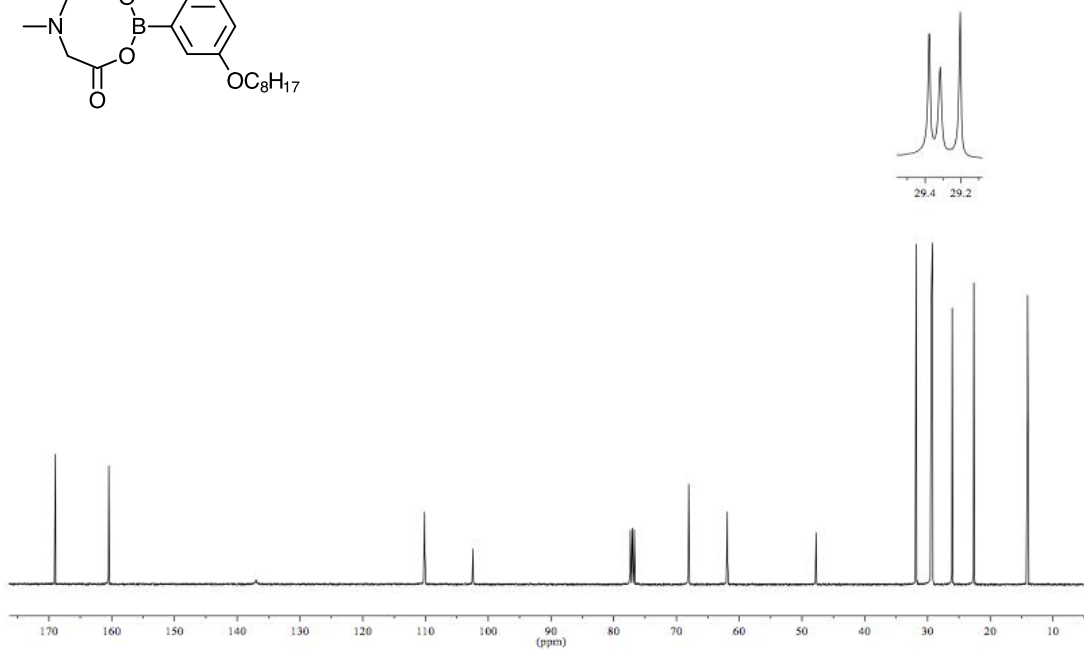

3,5-didecyloxy MIDA

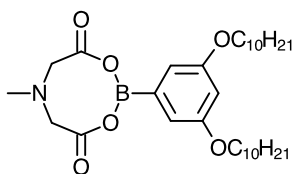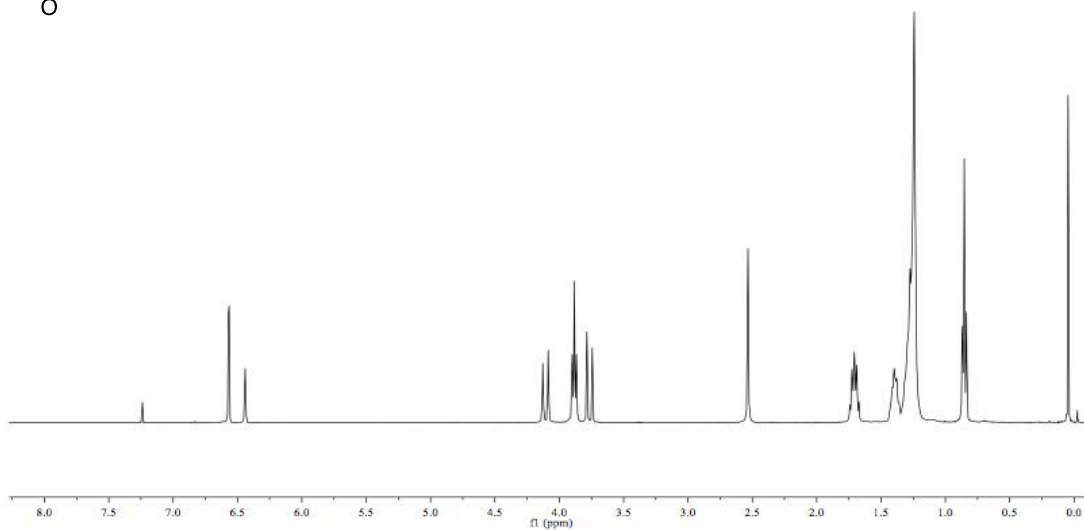

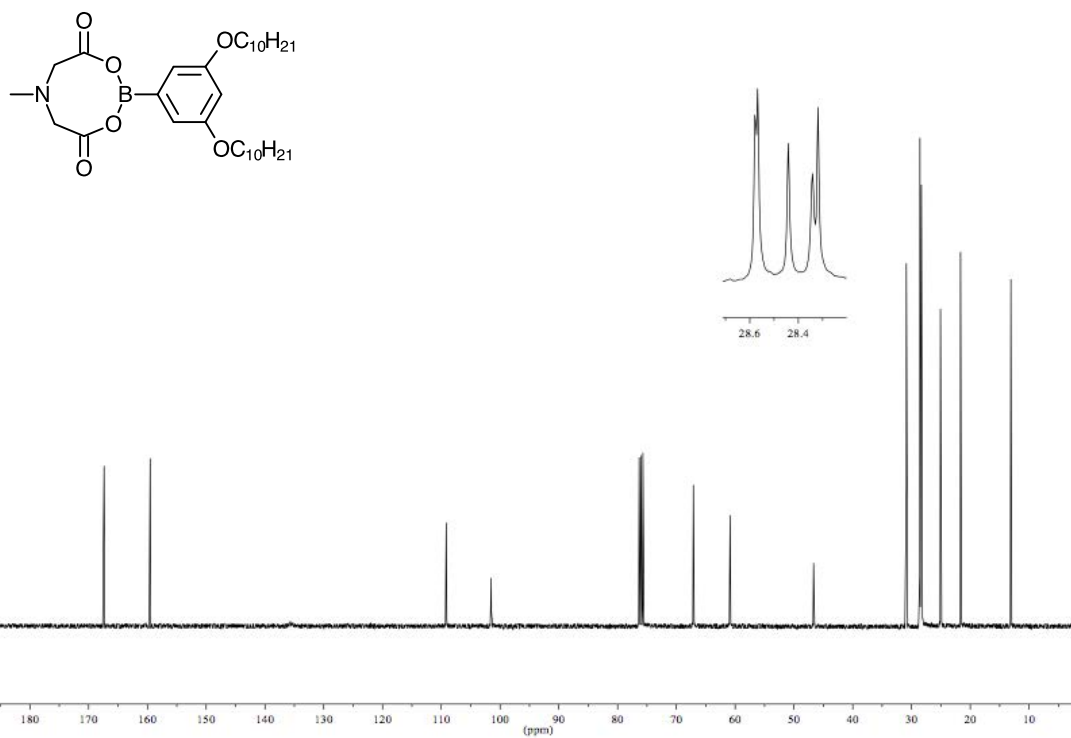

### 3,5-didodecyloxy MIDA

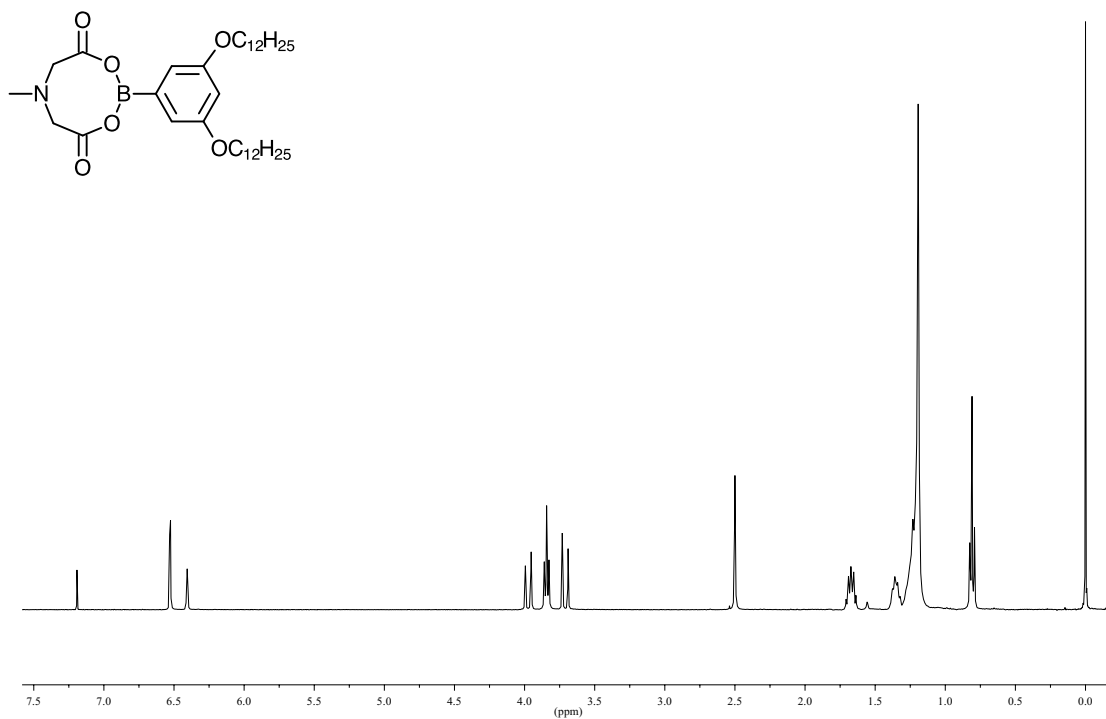

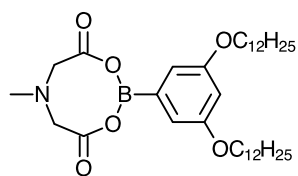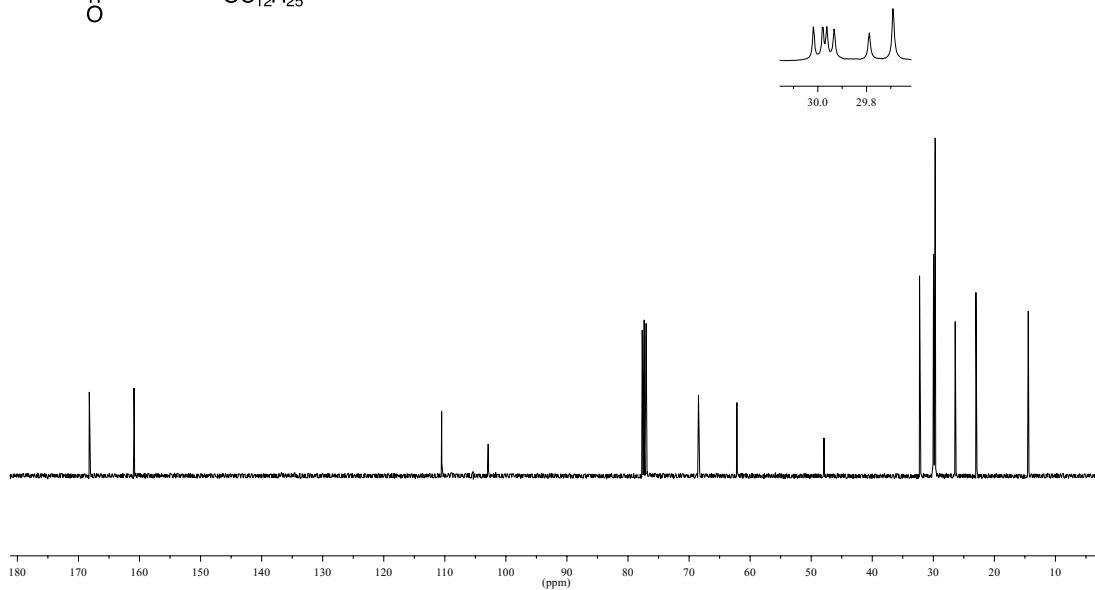

### 3,5-di(3,7-dimethyloctyloxy) MIDA

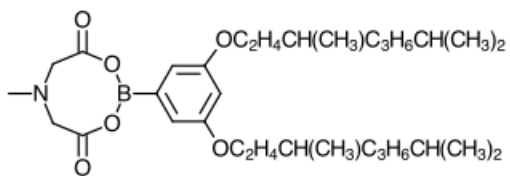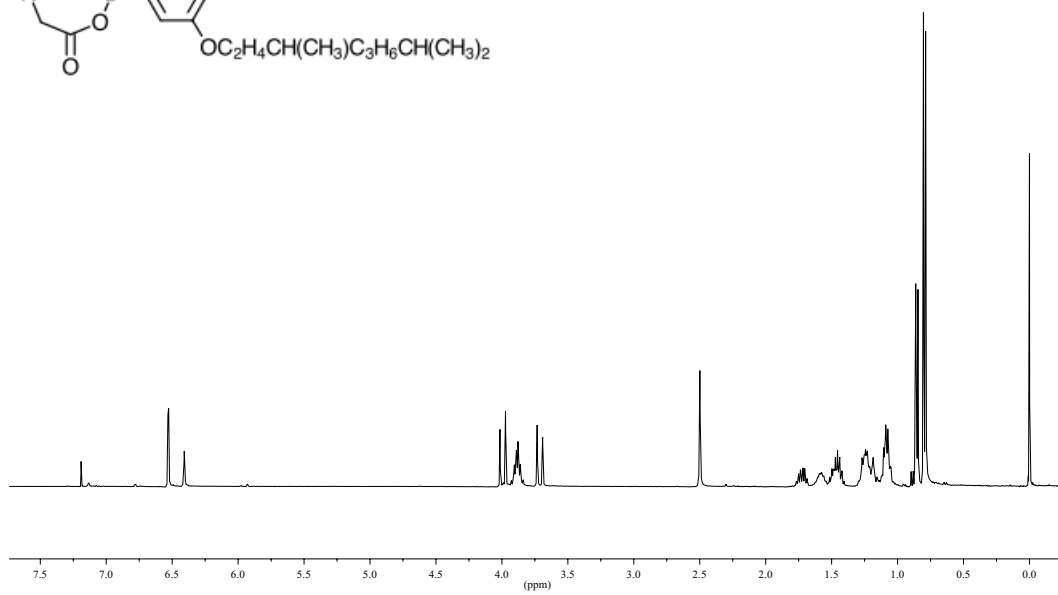

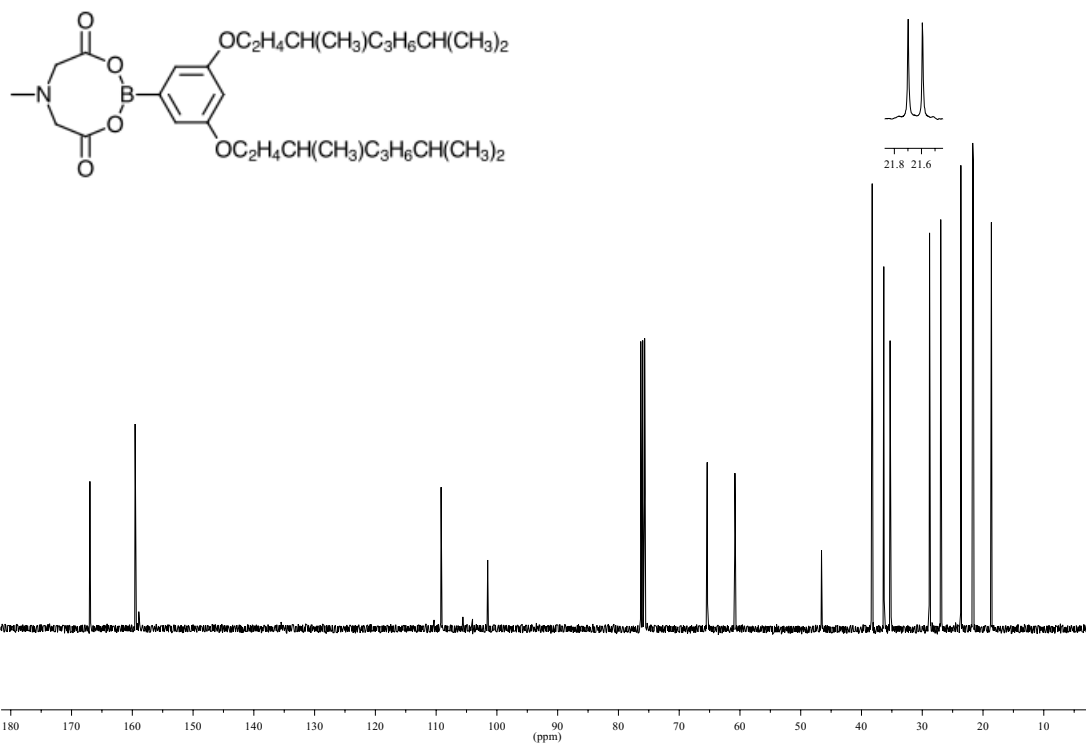

### 3,5-di(2-ethylhexyloxy) MIDA

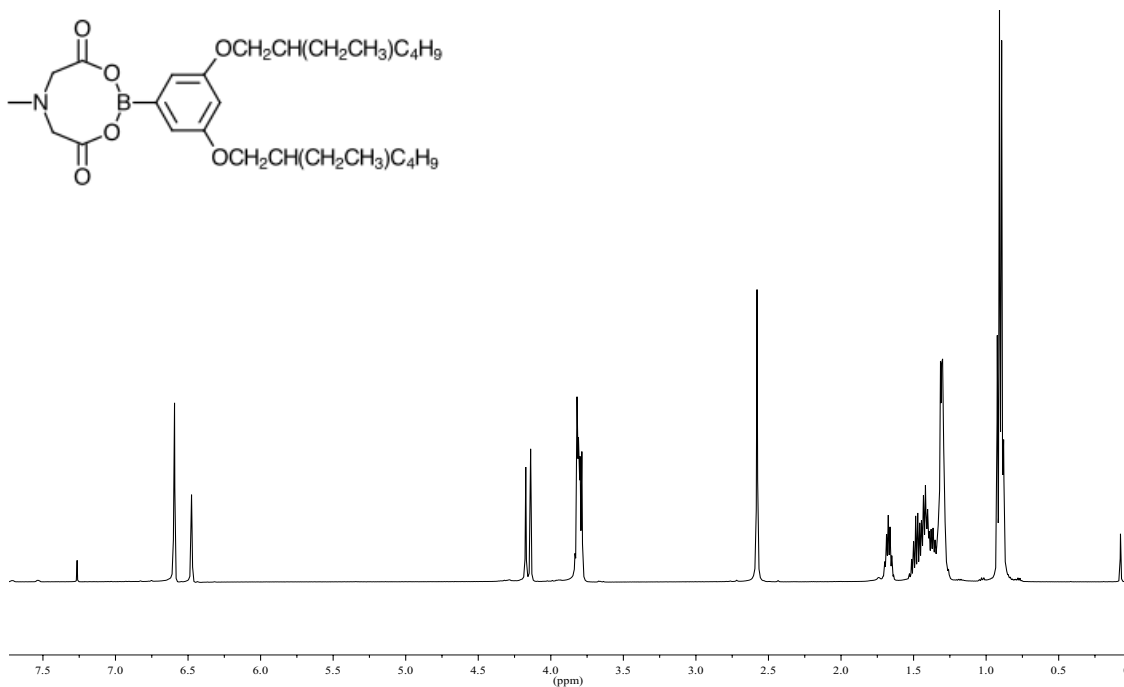

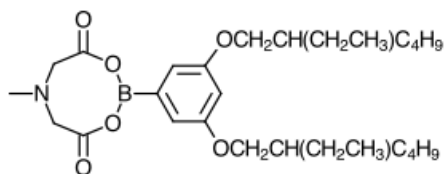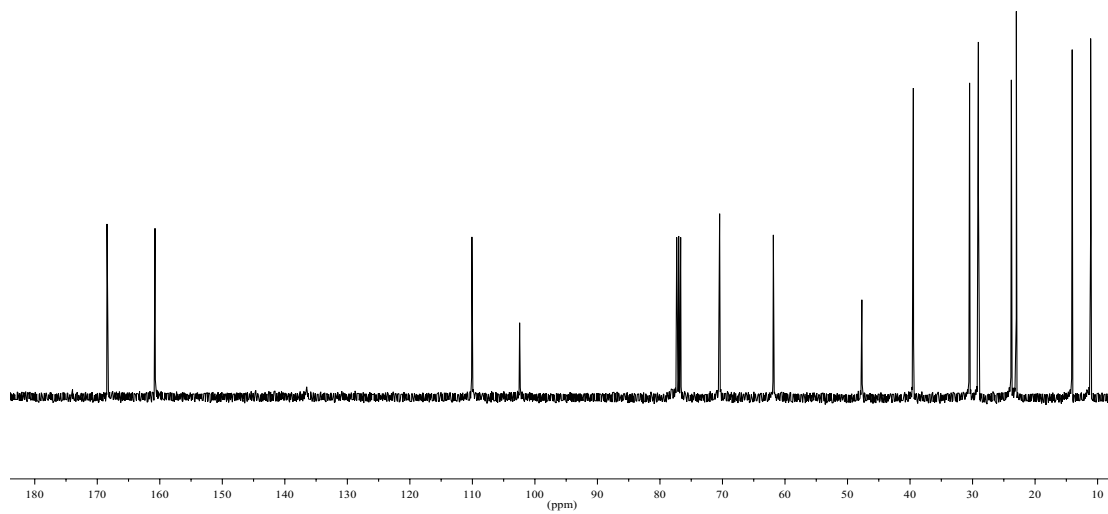

### Disotics p-hexyloxy disotic

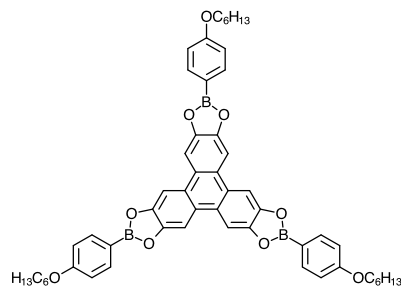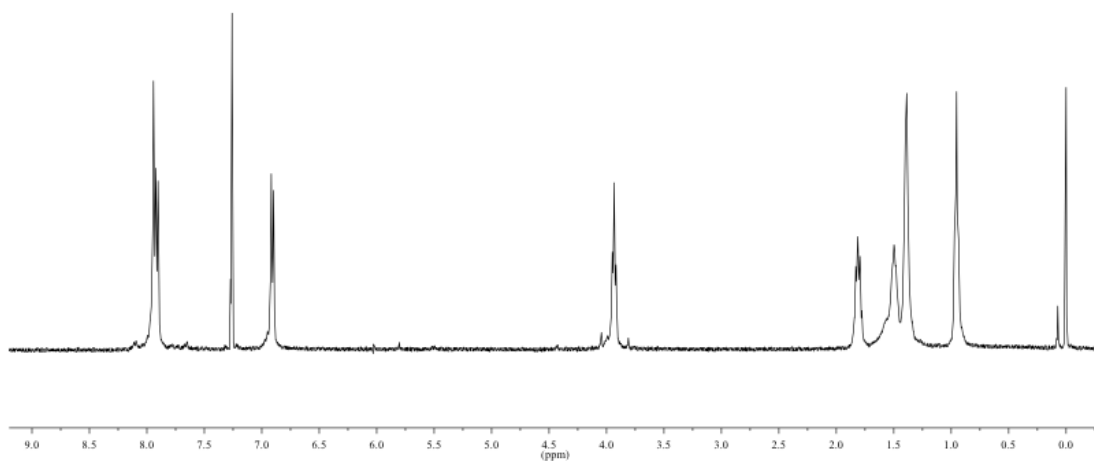

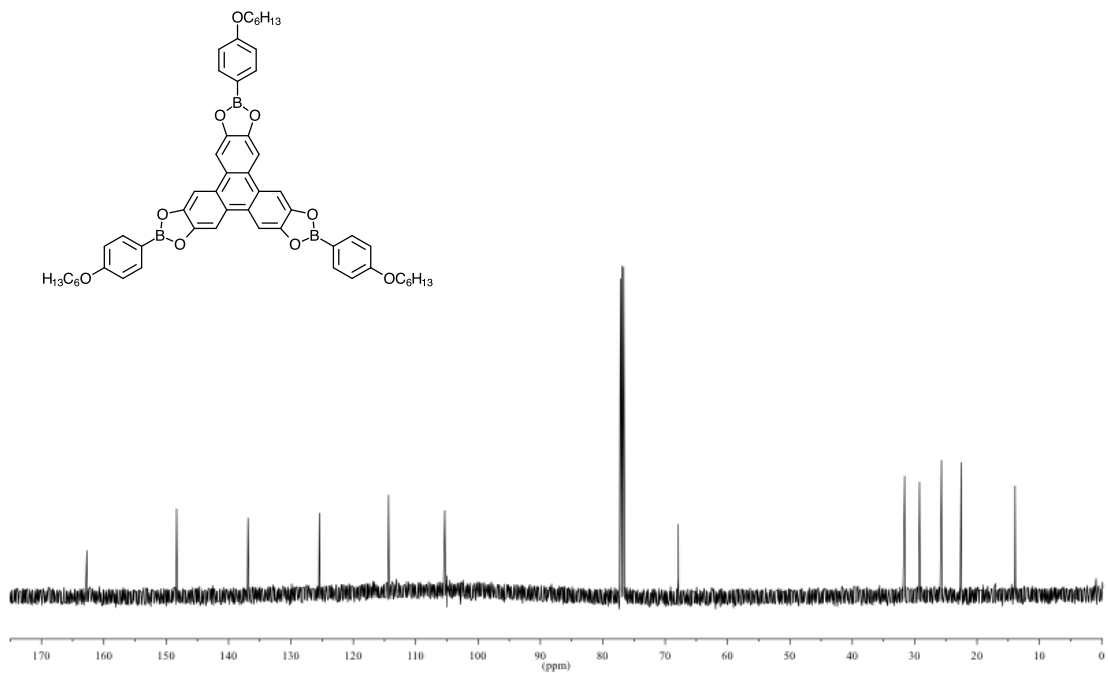

p-octyloxy discotic

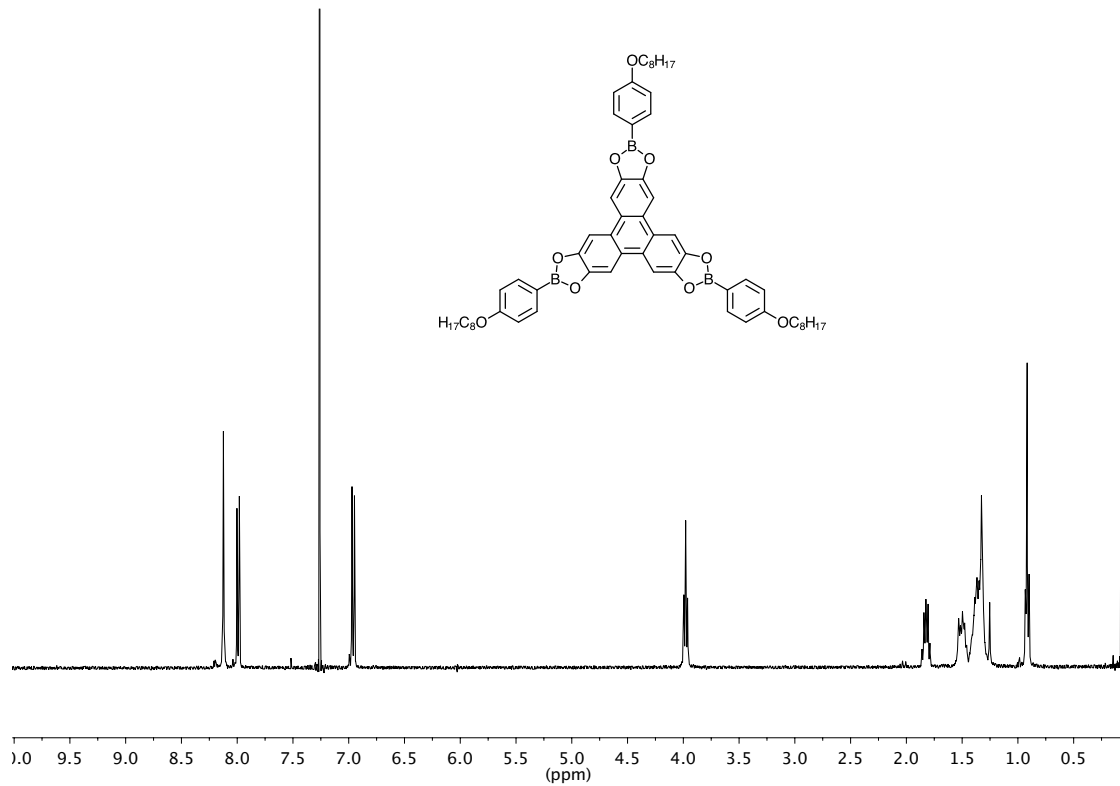



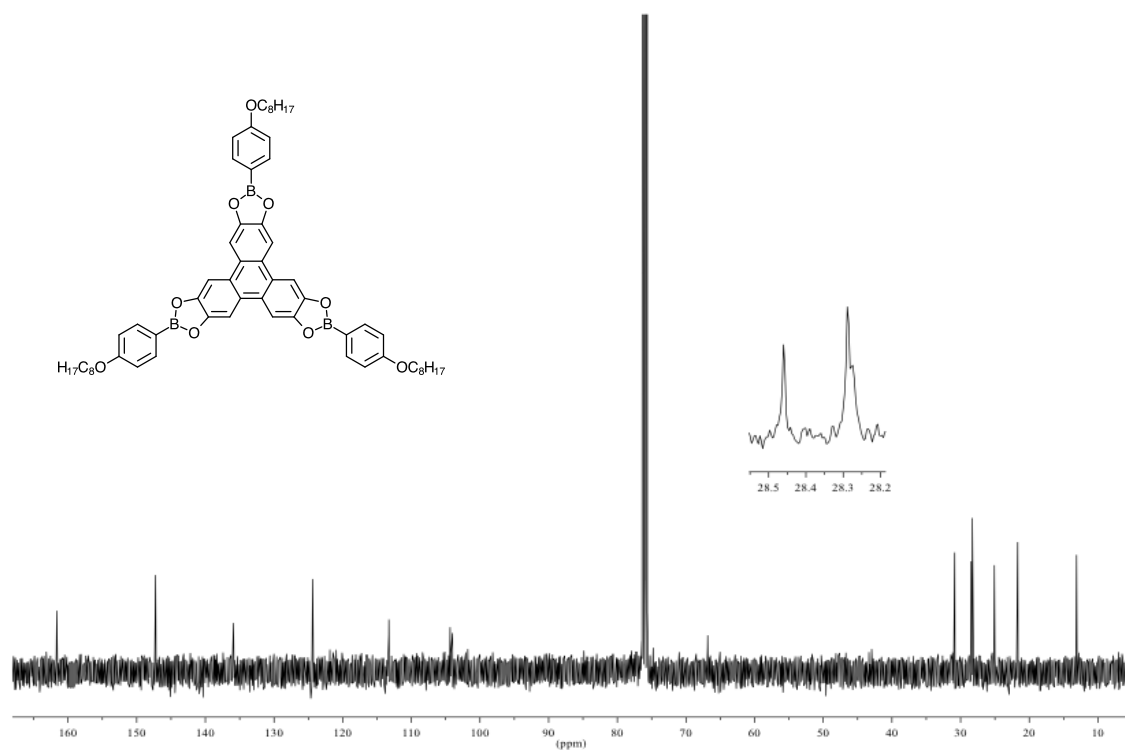

p-decyloxy discotic

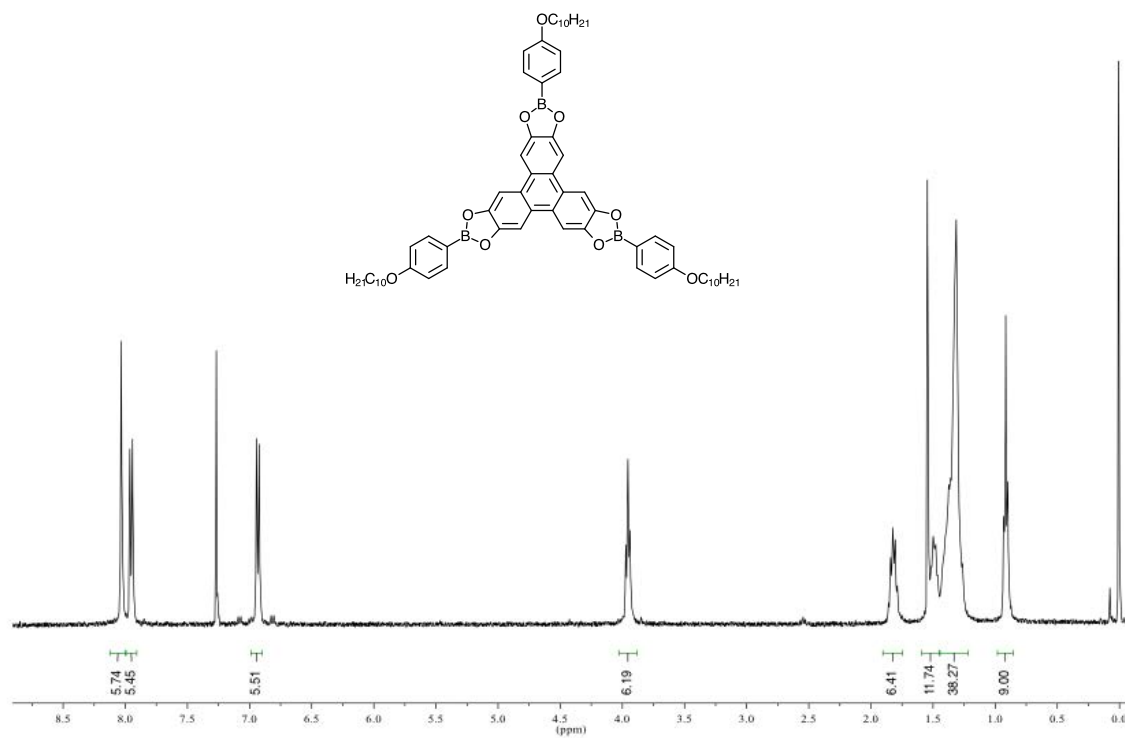

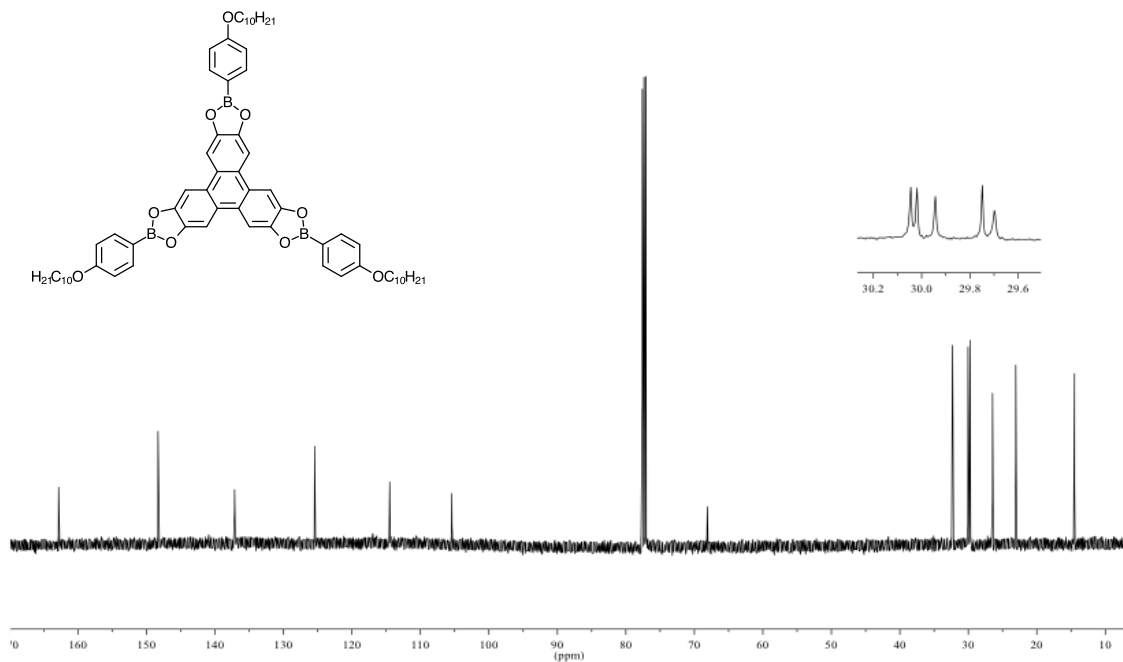

p-dodecyloxy discotic

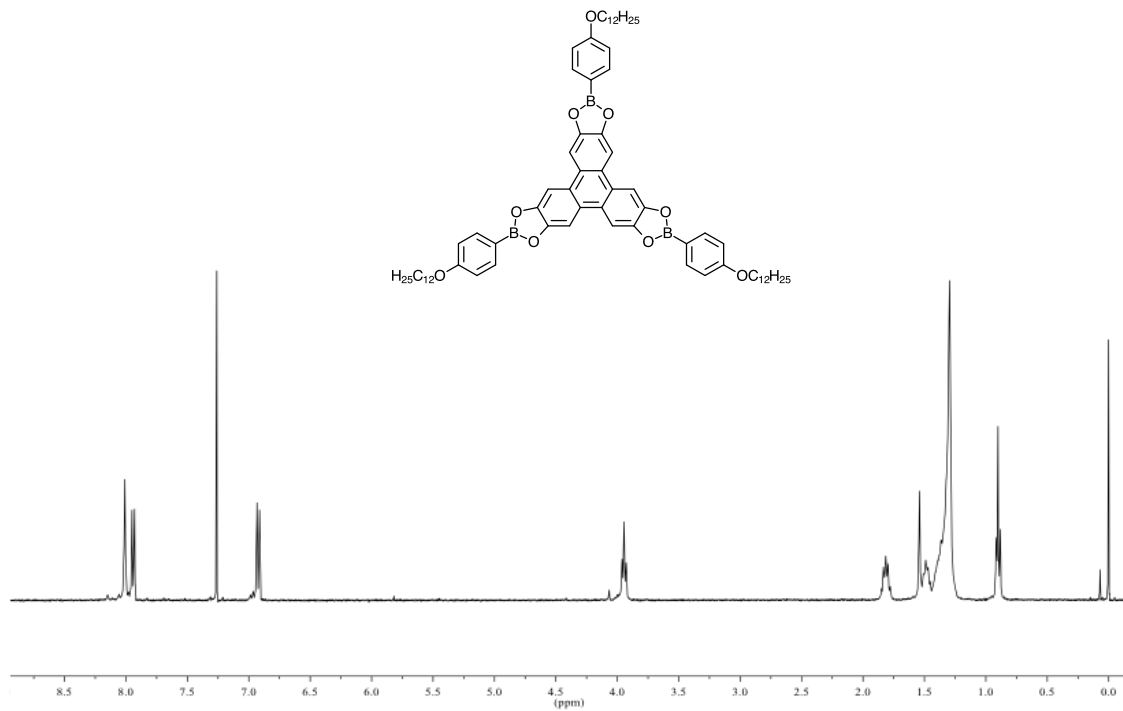

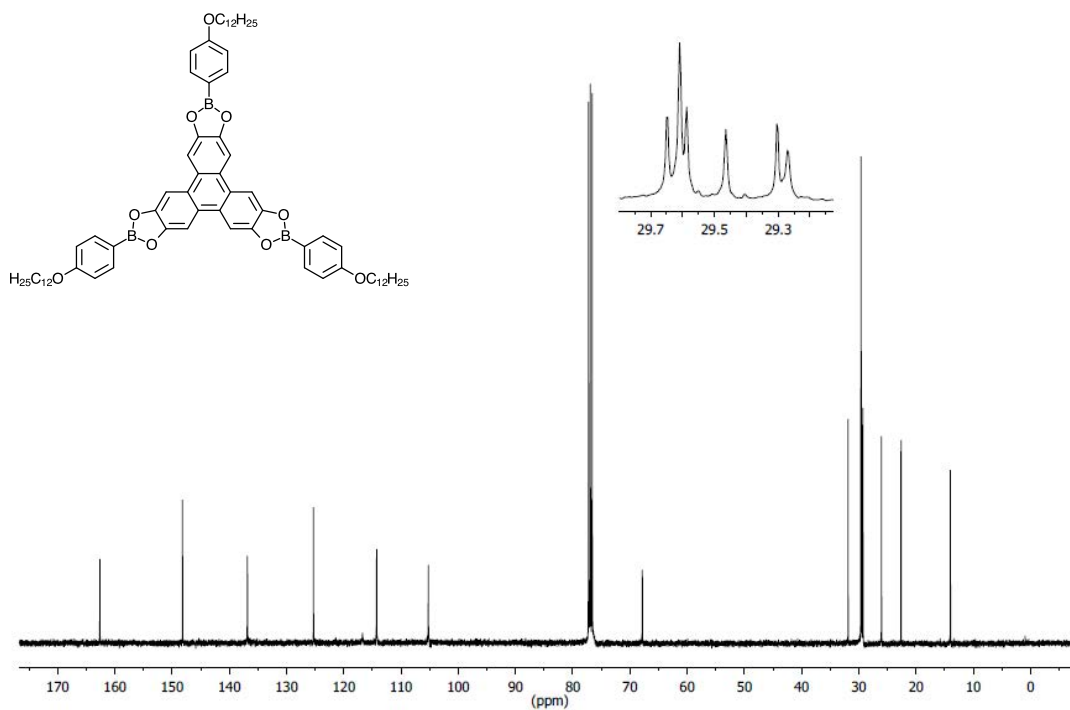

p-3,7-dimethyloctyloxy discotic

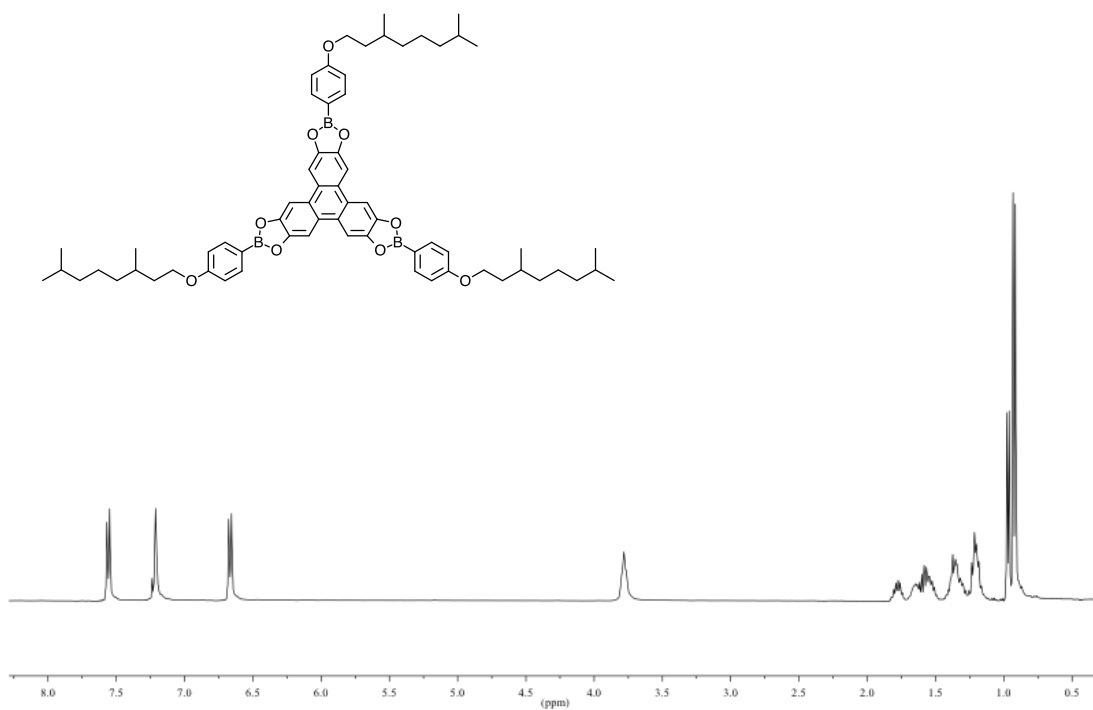

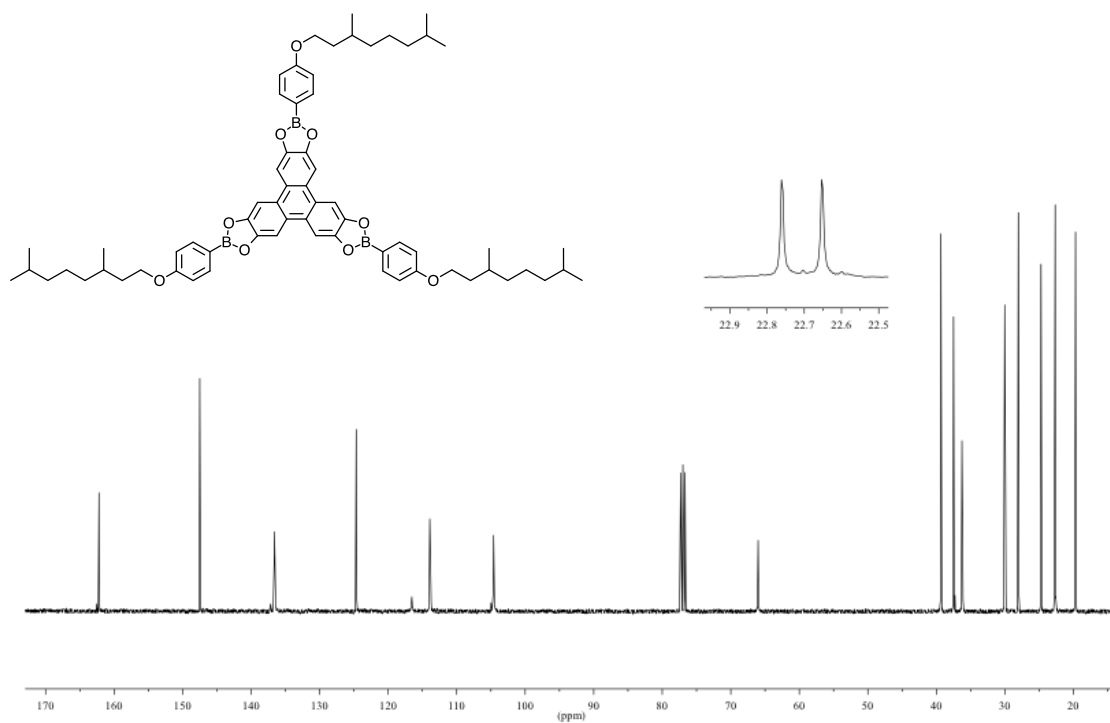

p-2-ethylhexyloxy discotic

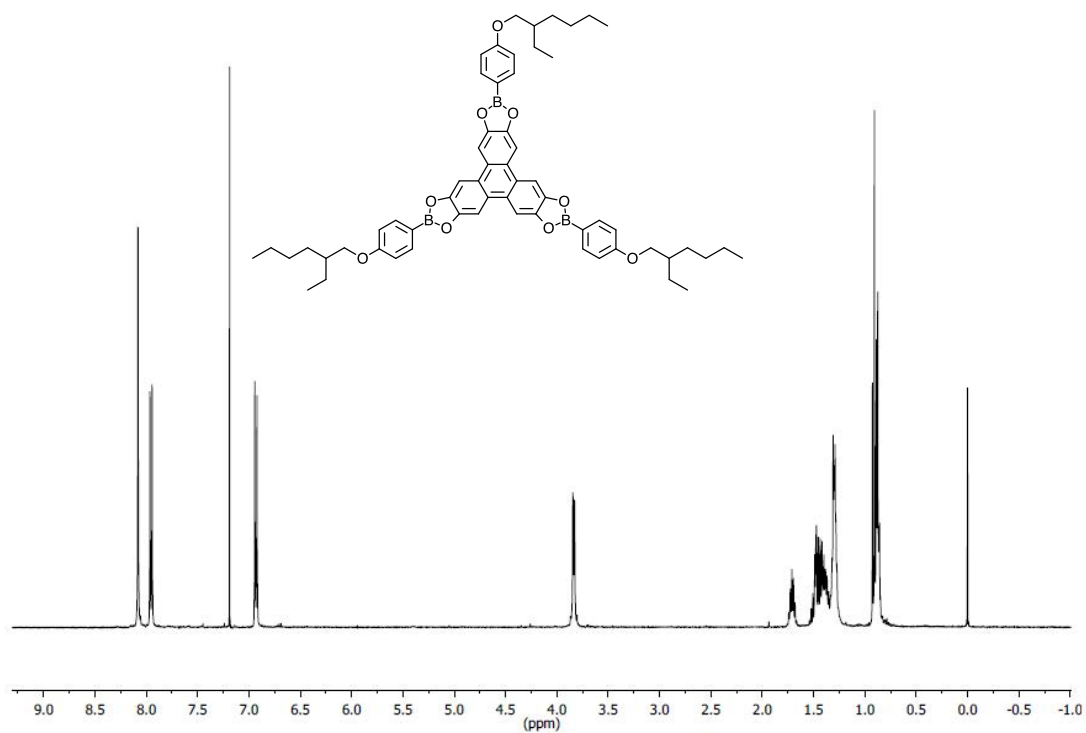

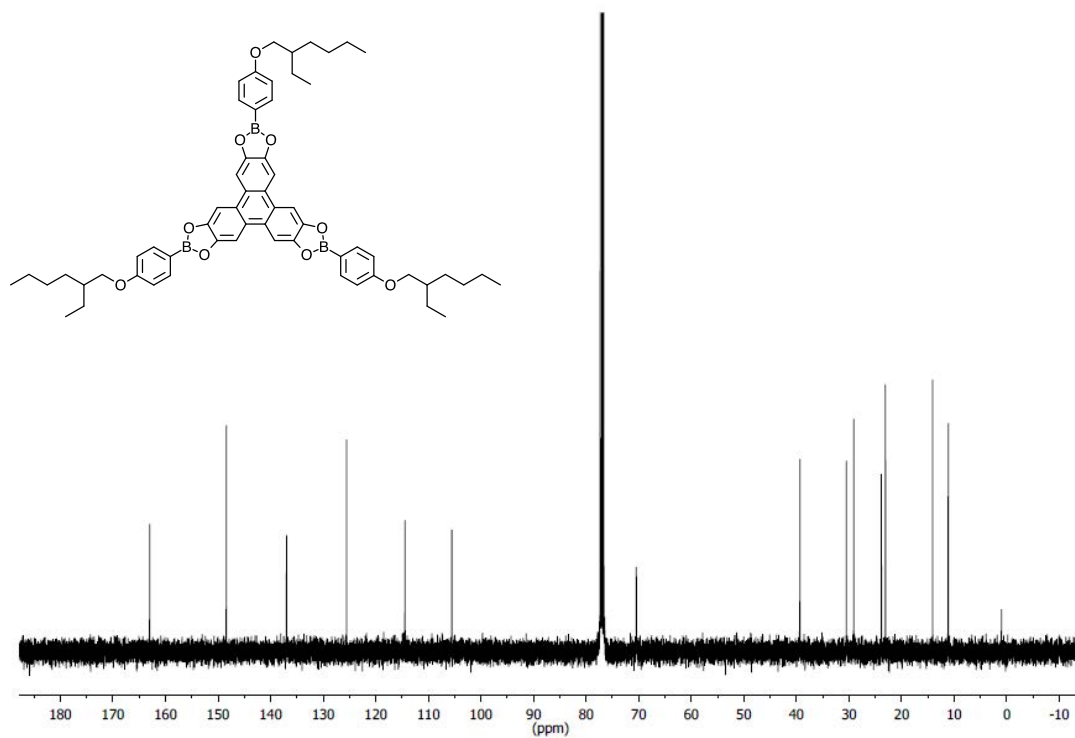

3,5-dihexyloxy discotic

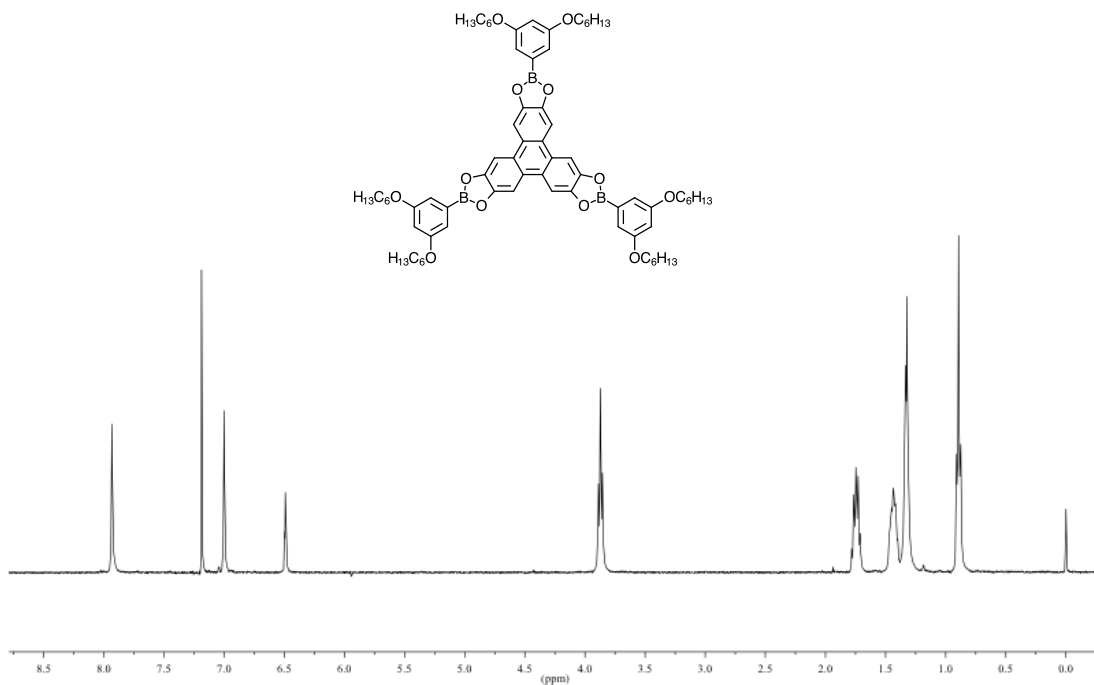

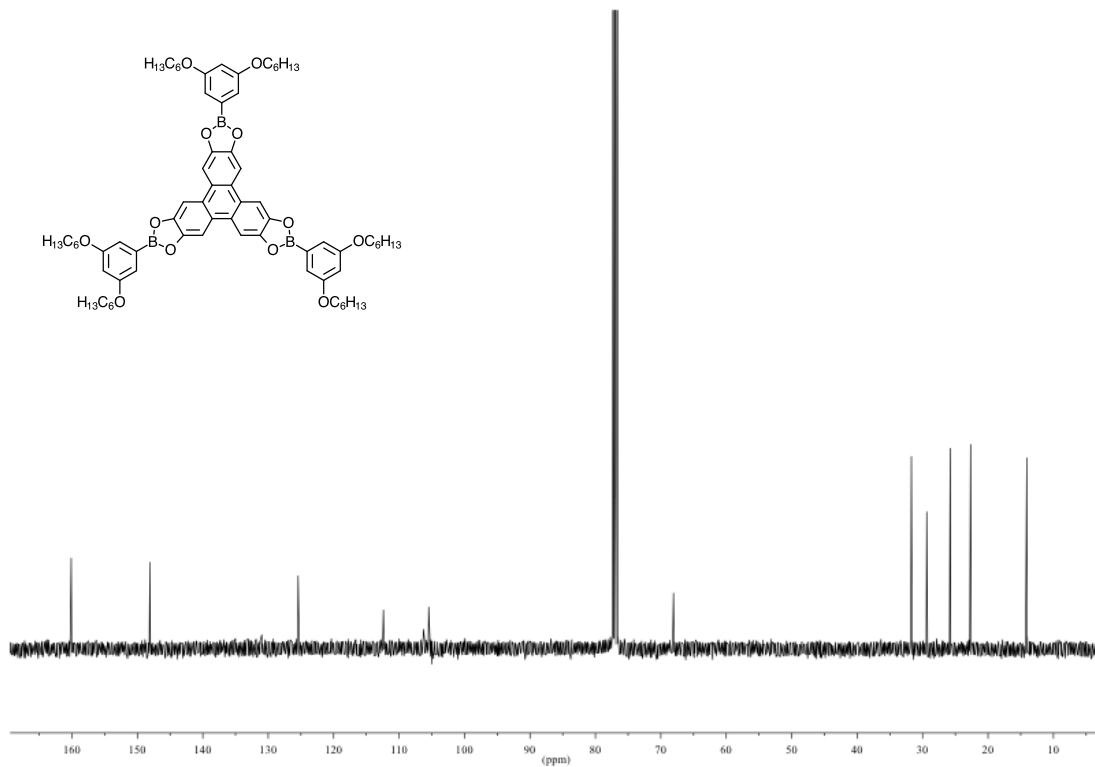

### 3,5-dioctyloxy discotic

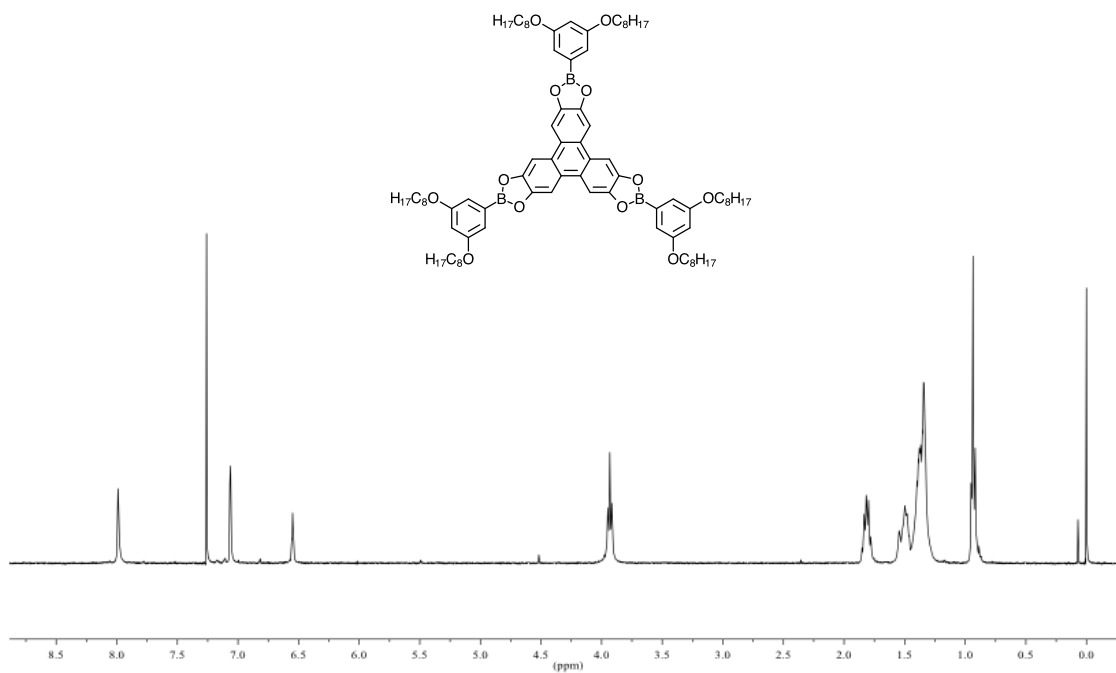

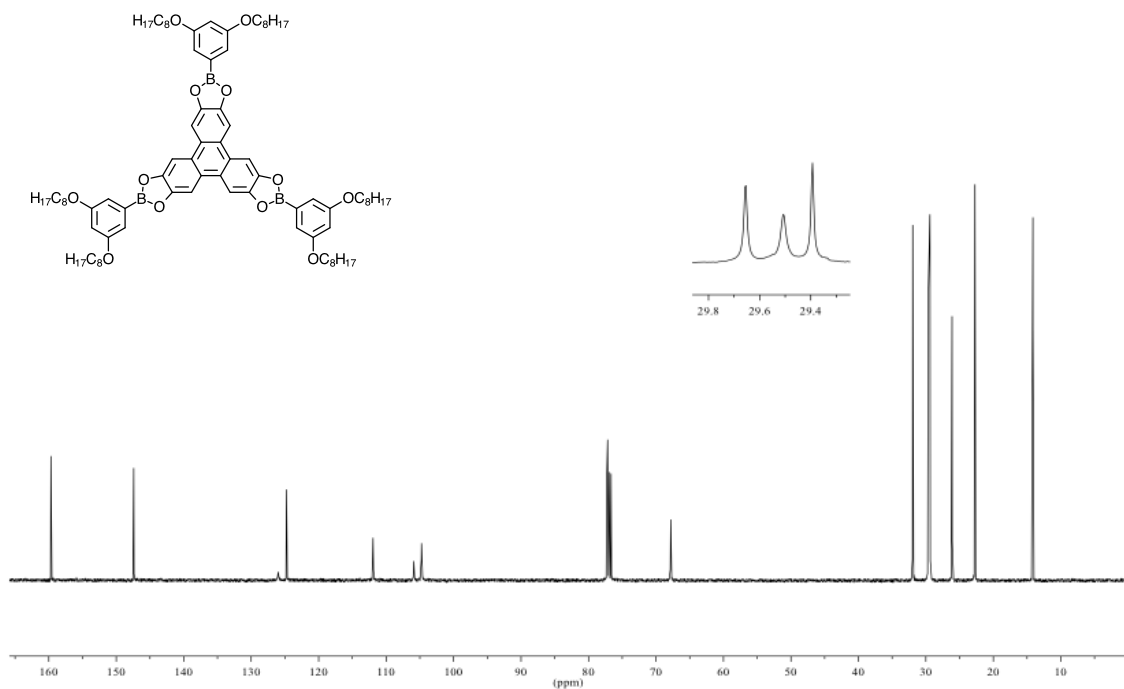

### 3,5-didecyloxy discotic

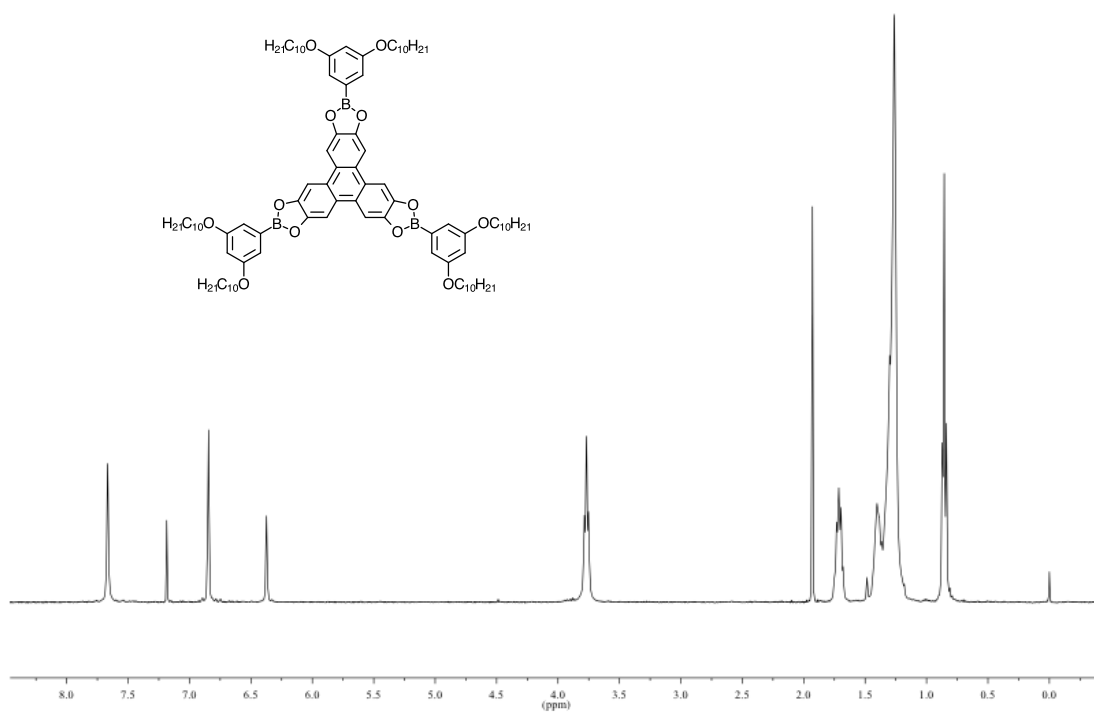

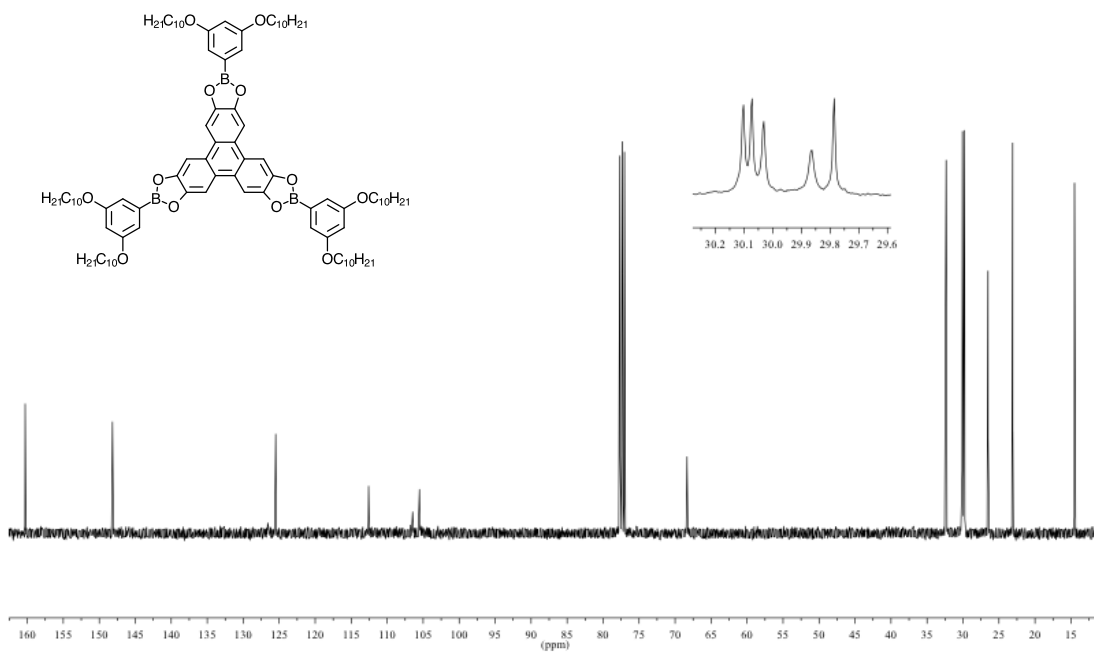

### 3,5-didodecyloxy discotic

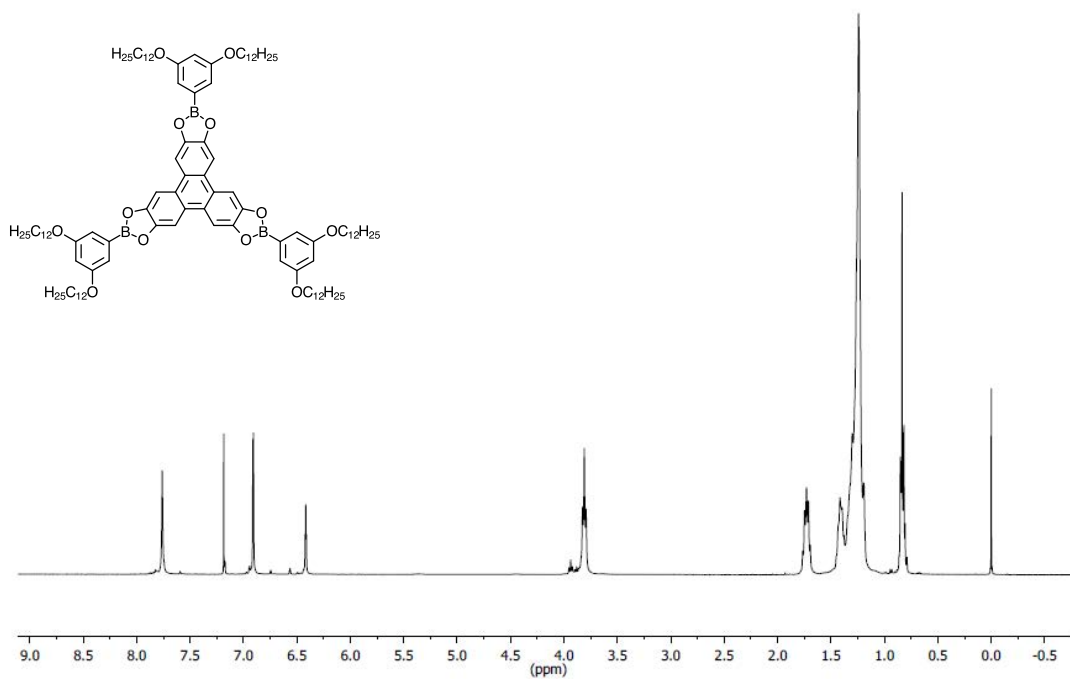



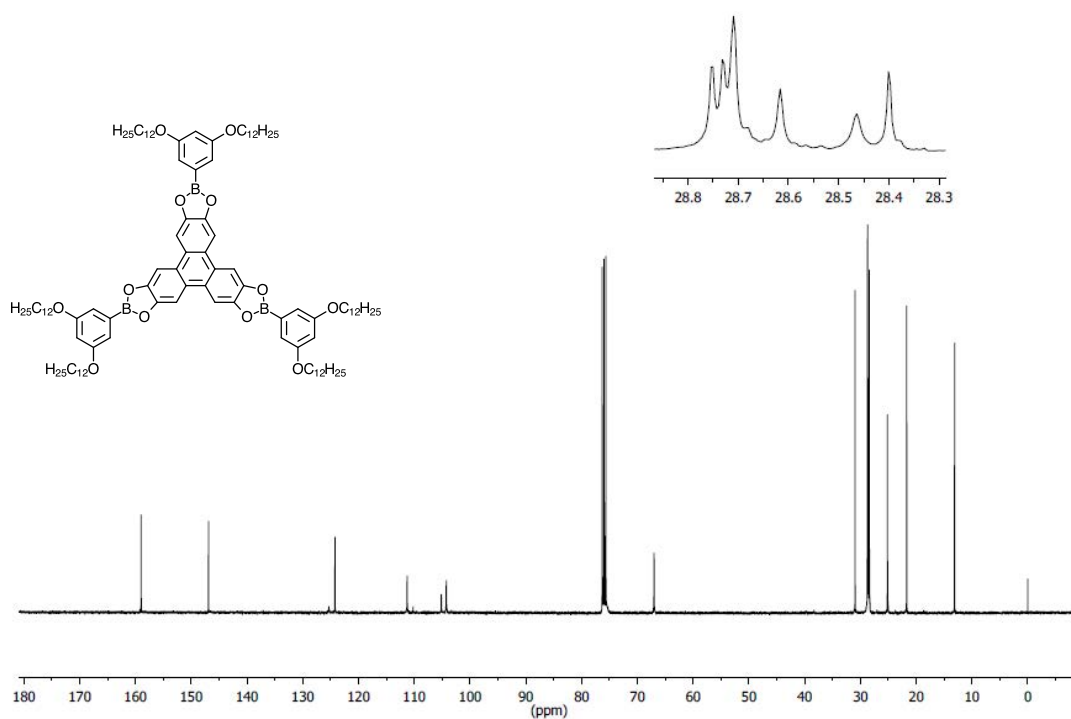

### 3,5-di(3,7-dimethyloctyloxy) discotic

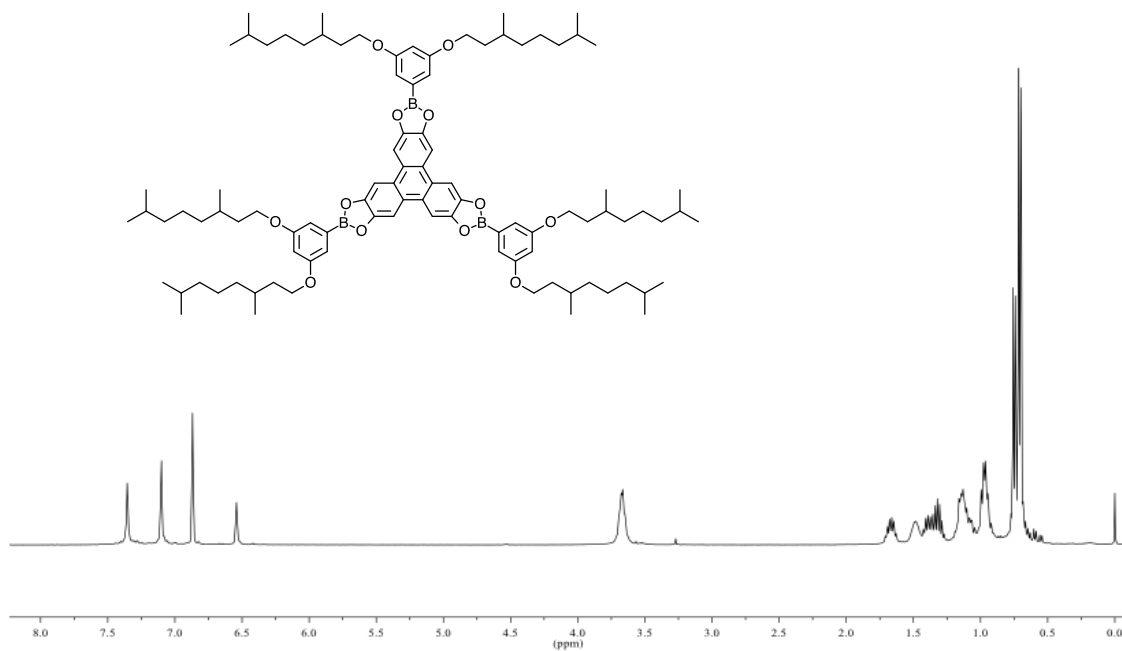

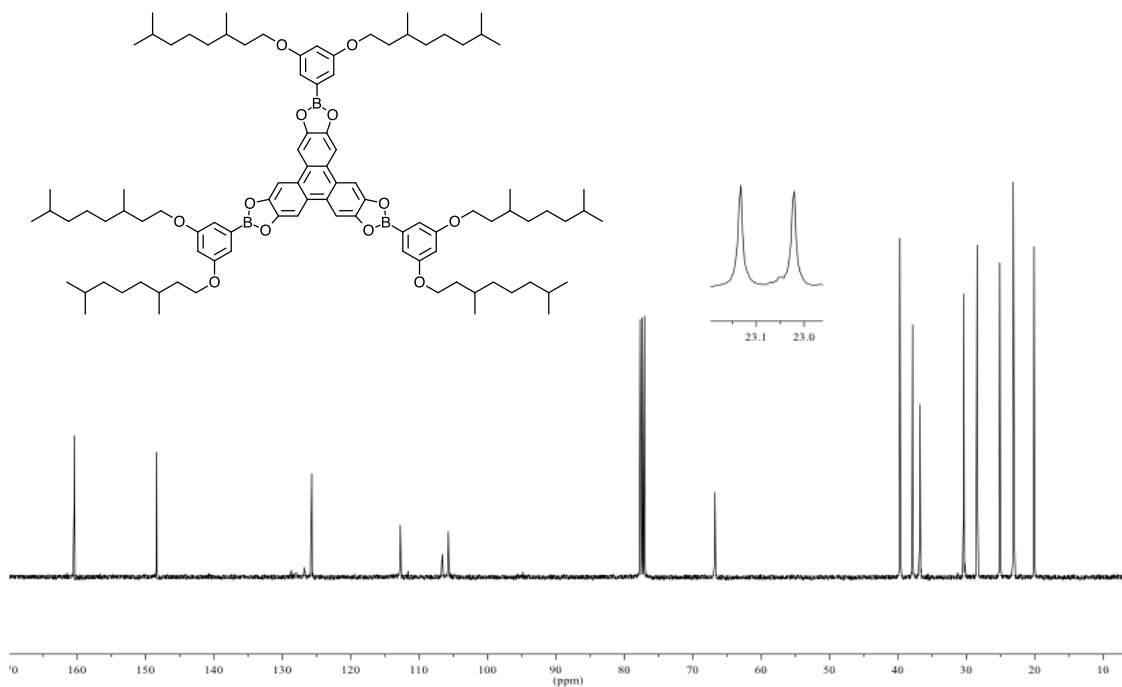

### 3,5-di(2-ethylhexyloxy) discotic

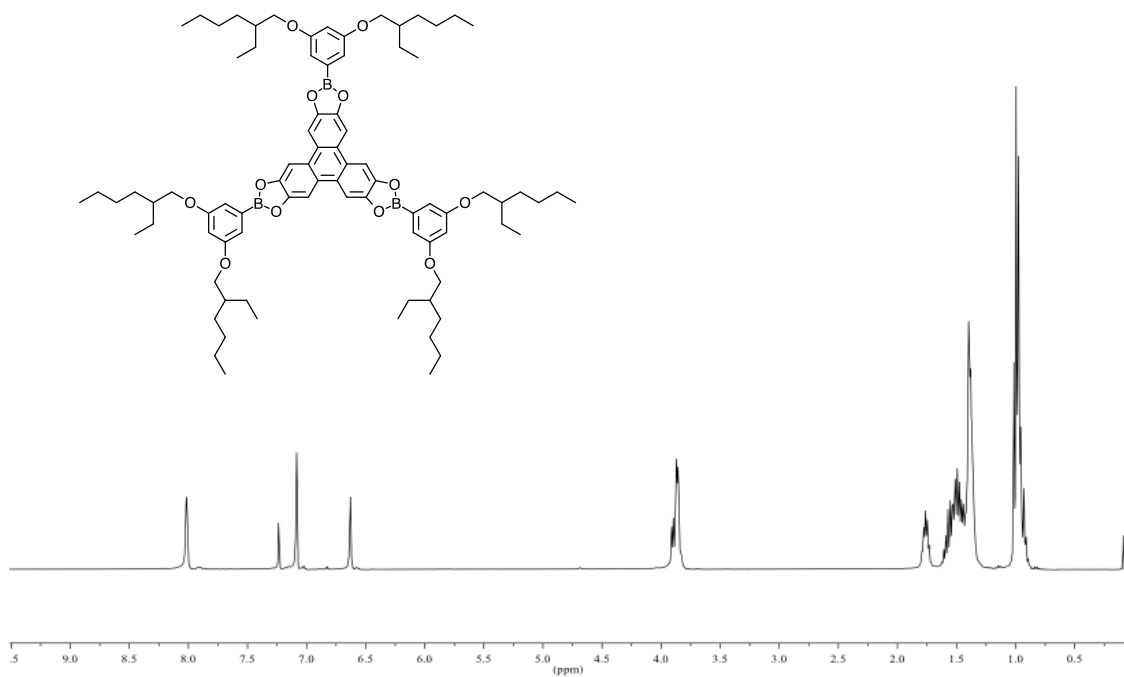

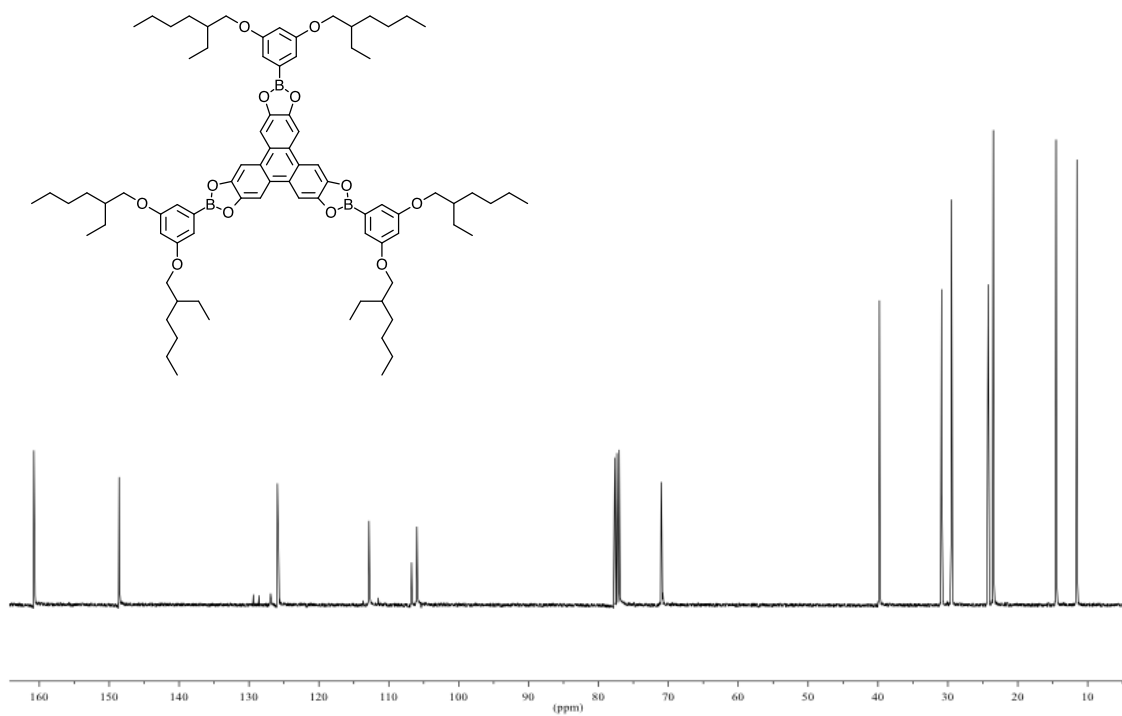

## Mass Spectra

### p-3,7-dimethyloctyloxy bromobenzene

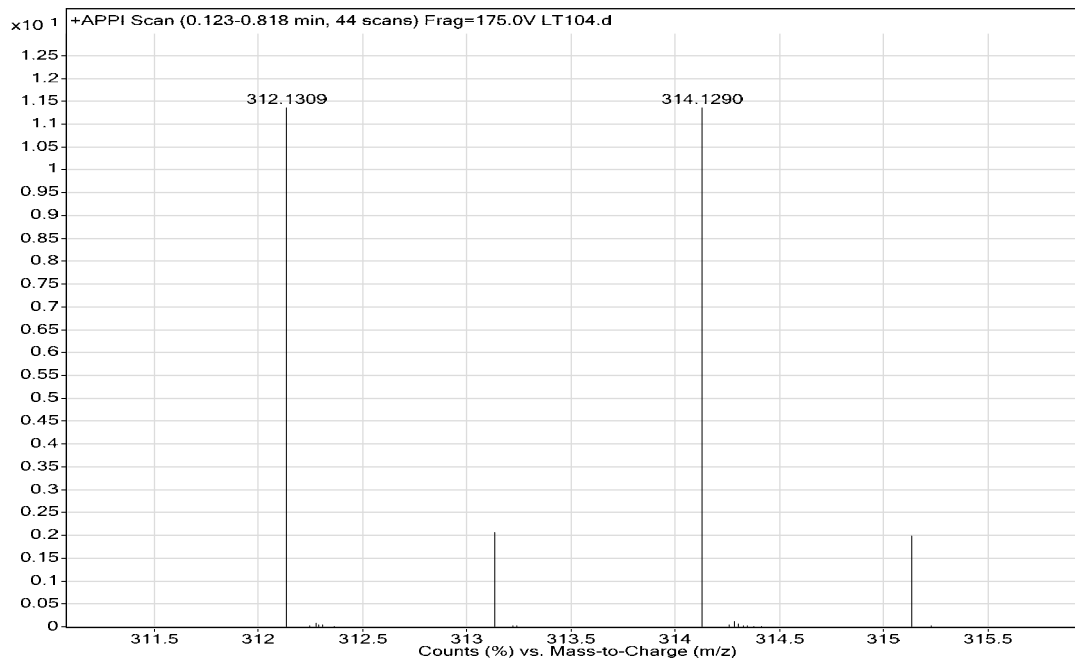

### 3,5-dihexyloxy bromobenzene

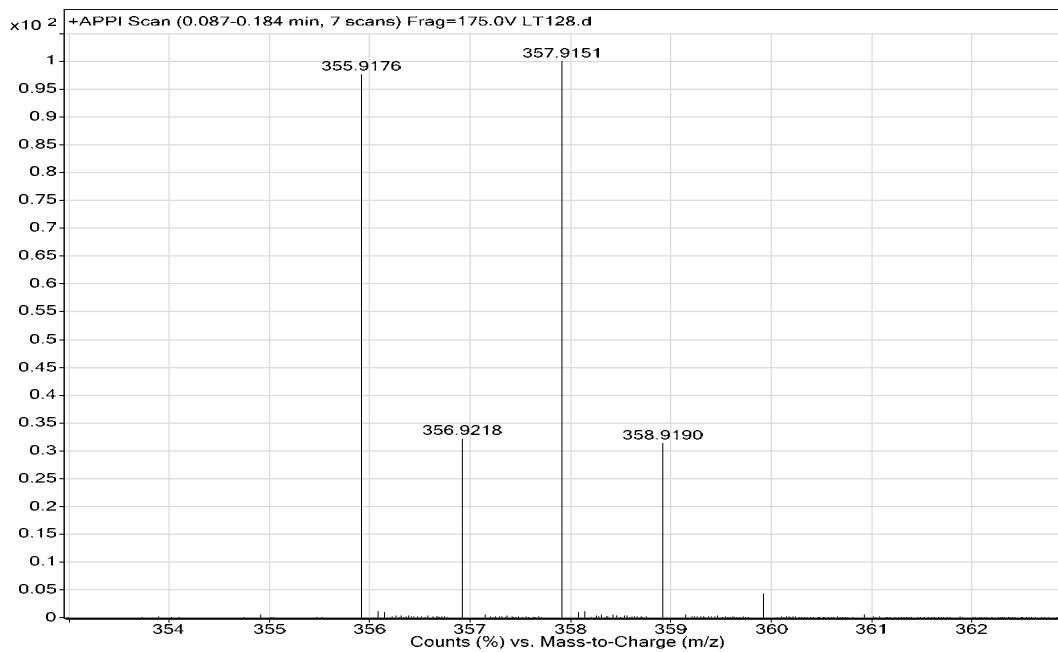

### 3,5-dioctyloxy bromobenzene

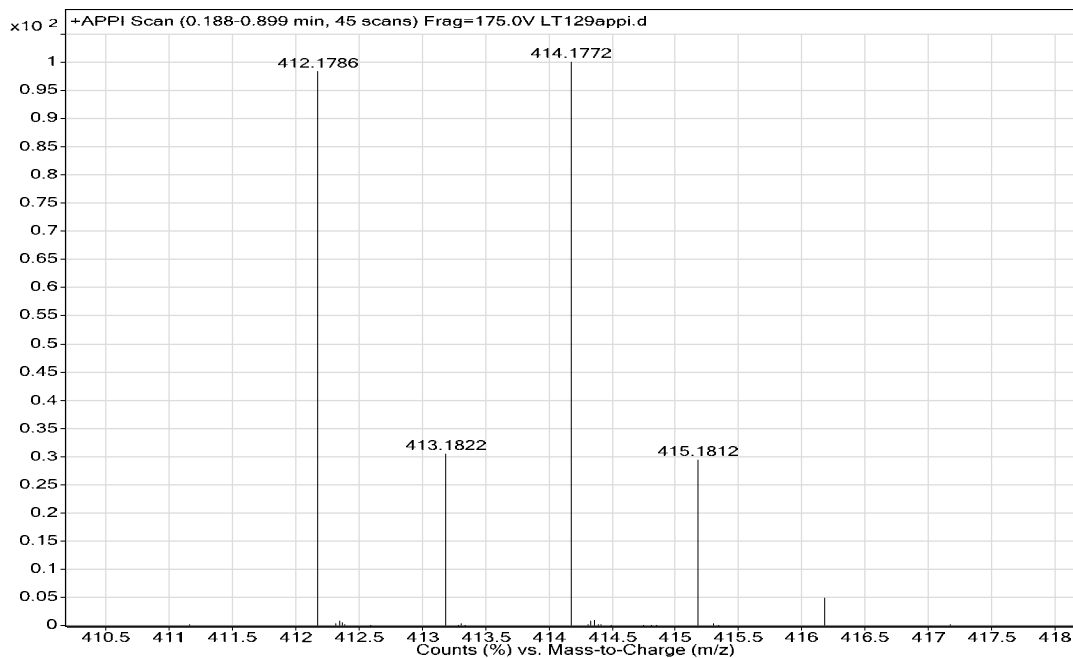

### 3,5-didecyloxy bromobenzene

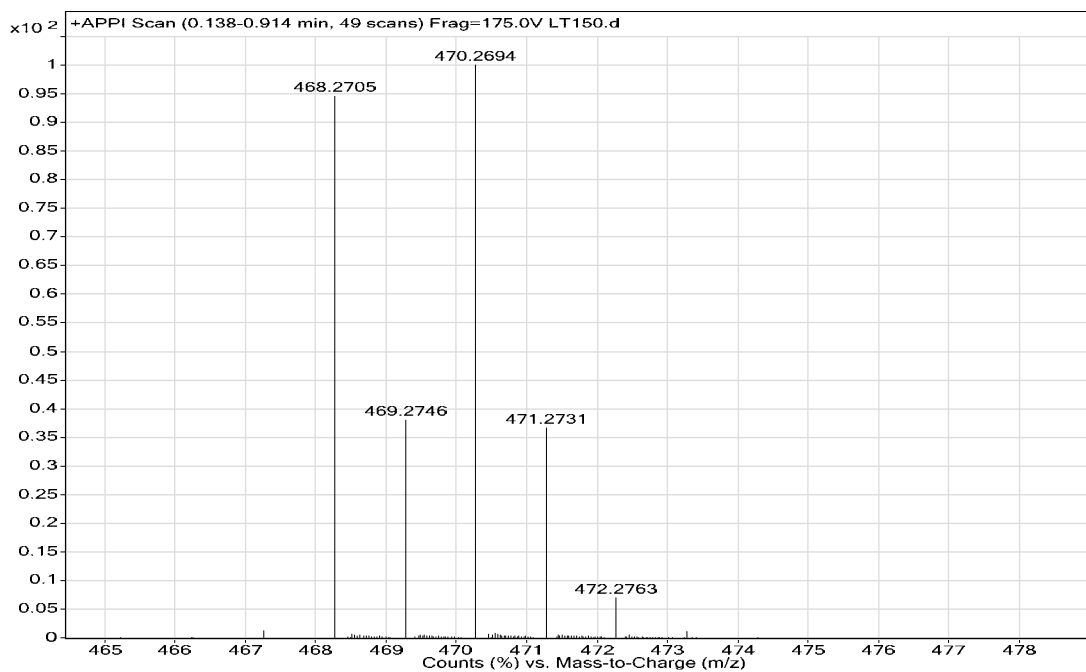

### 3,5-didodecyloxy bromobenzene

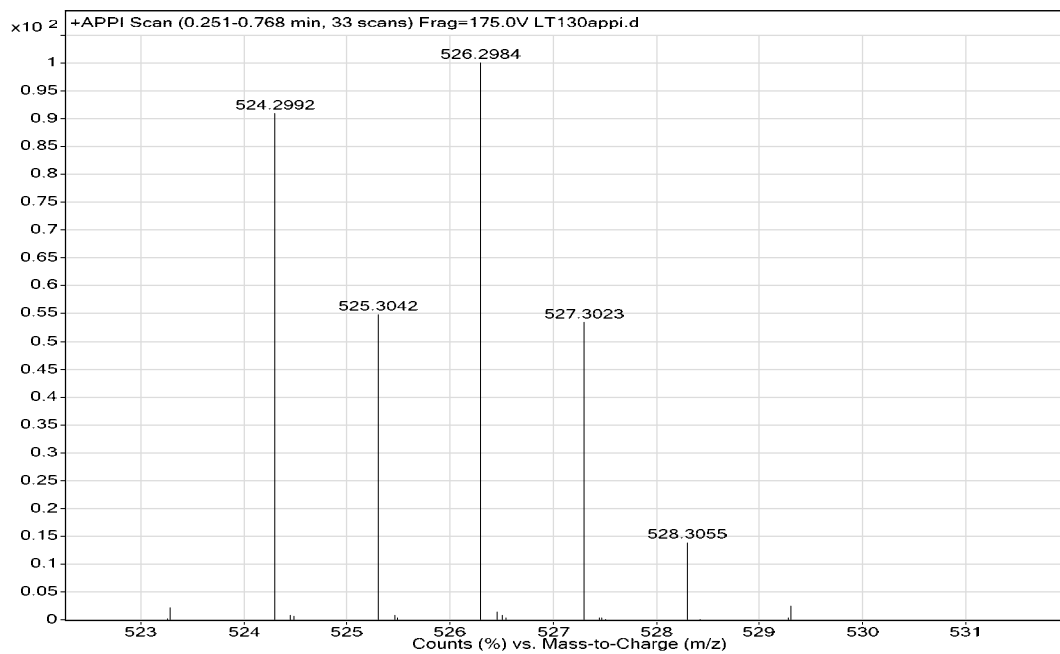

### 3,5-di(3,7-dimethyloctyloxy) bromobenzene

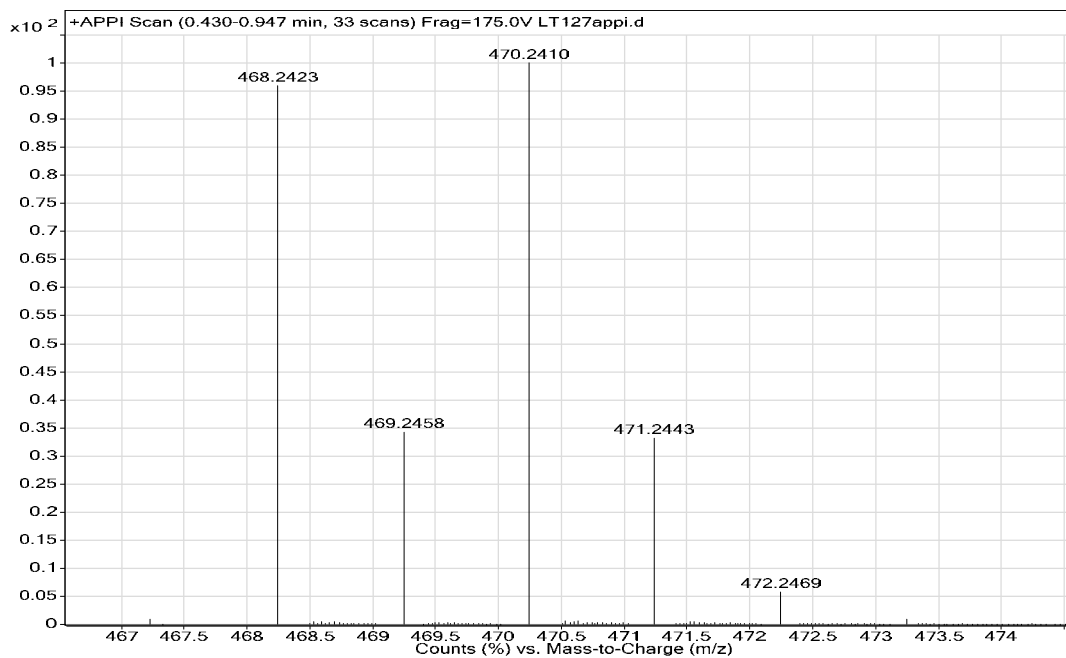

### 3,5-di(2-ethylhexyloxy) bromobenzene

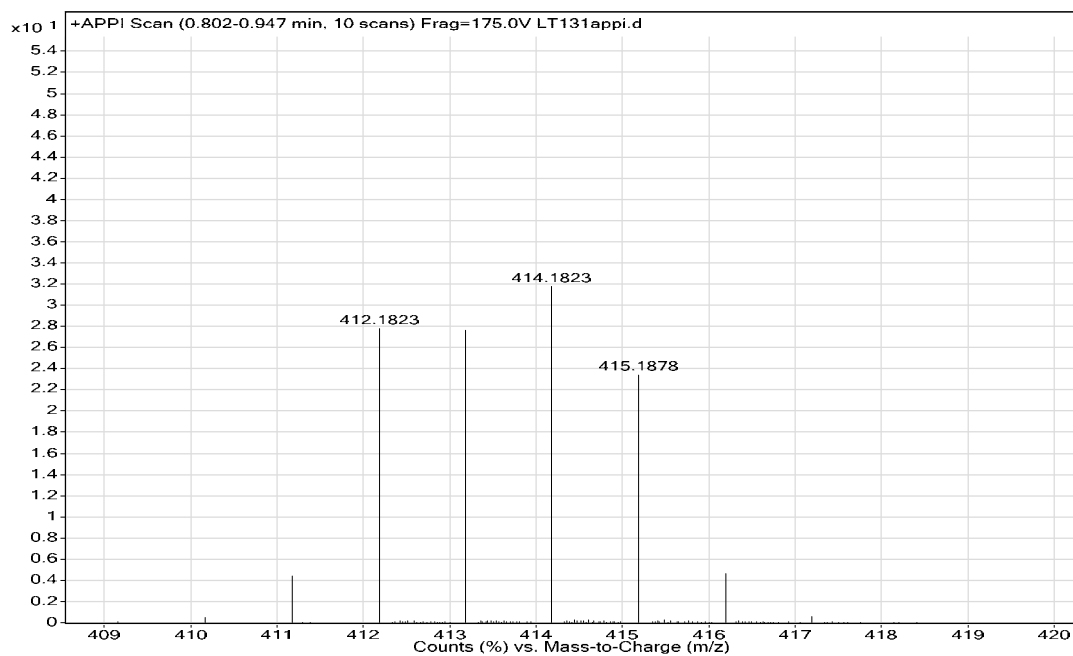

### p-hexyloxy MIDA

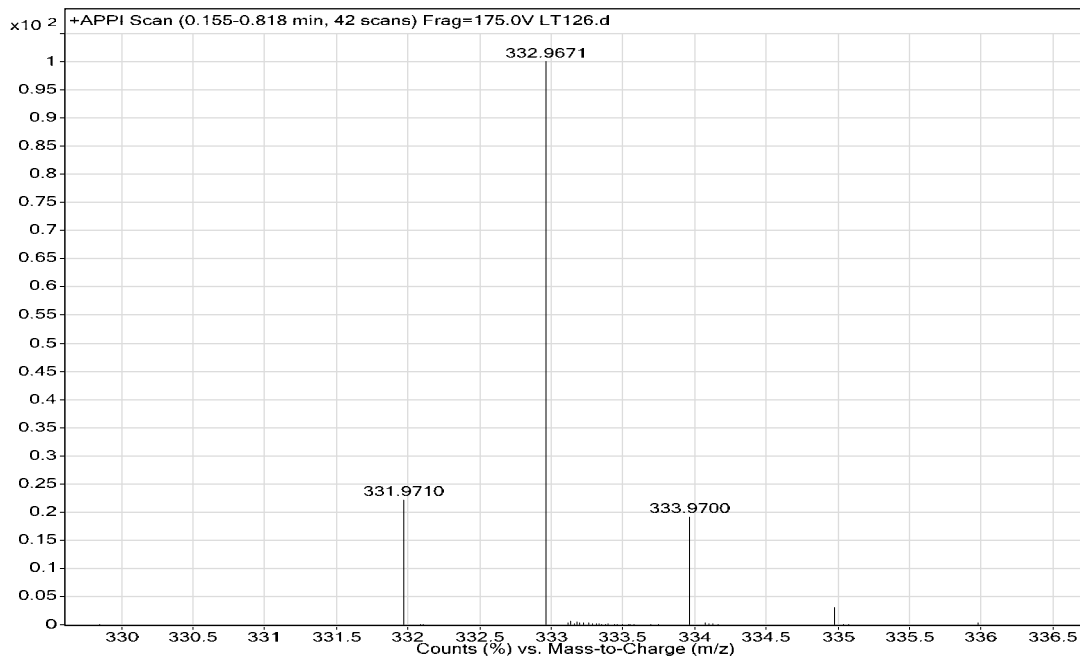

### p-octyloxy MIDA

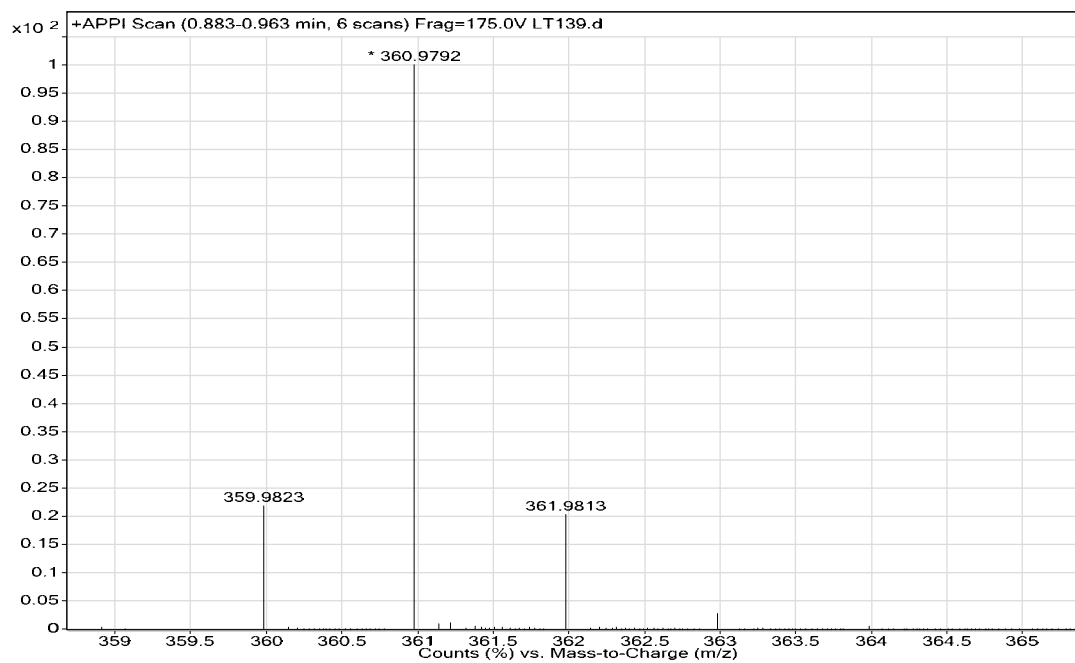

### p-decyloxy MIDA

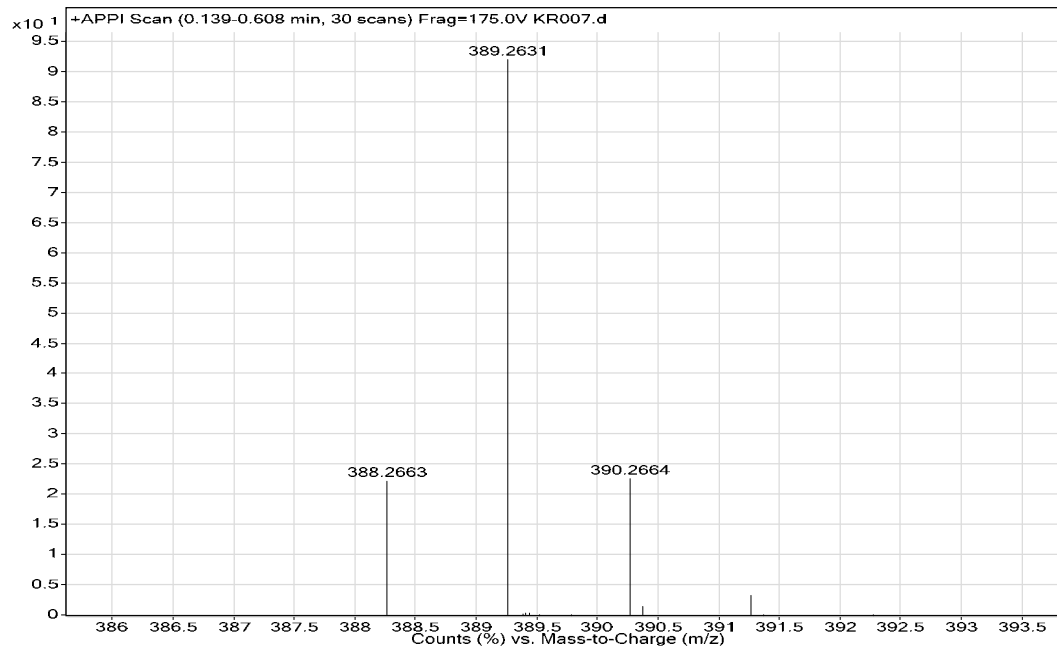



### p-dodecyloxy MIDA

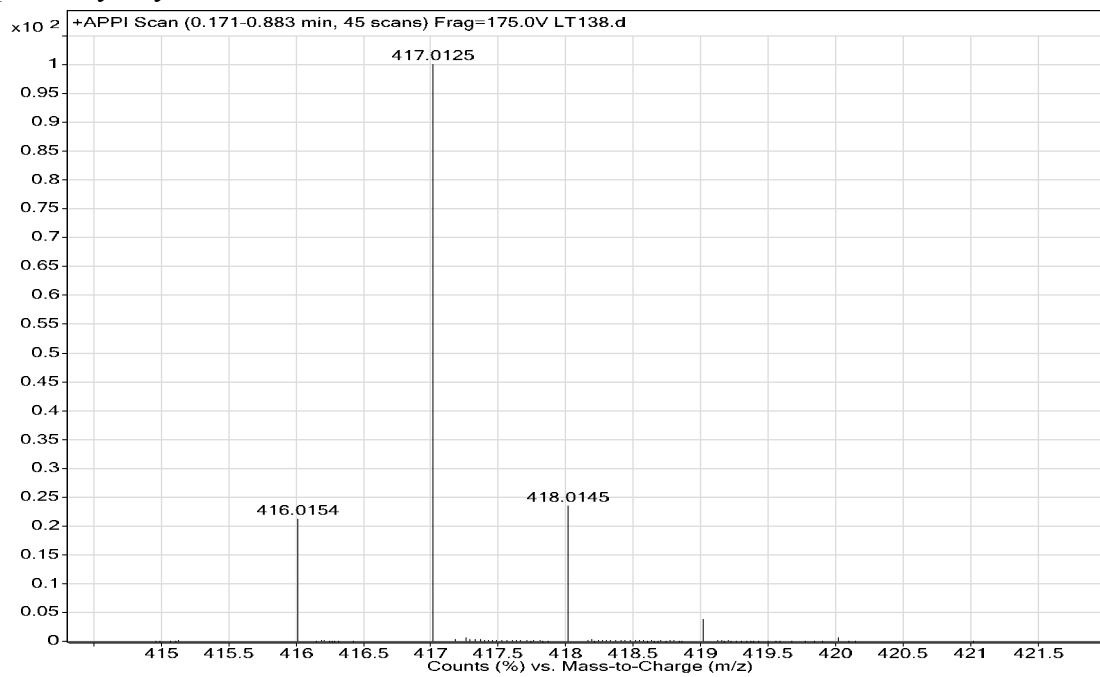

### p-3,7-dimethyloxy MIDA

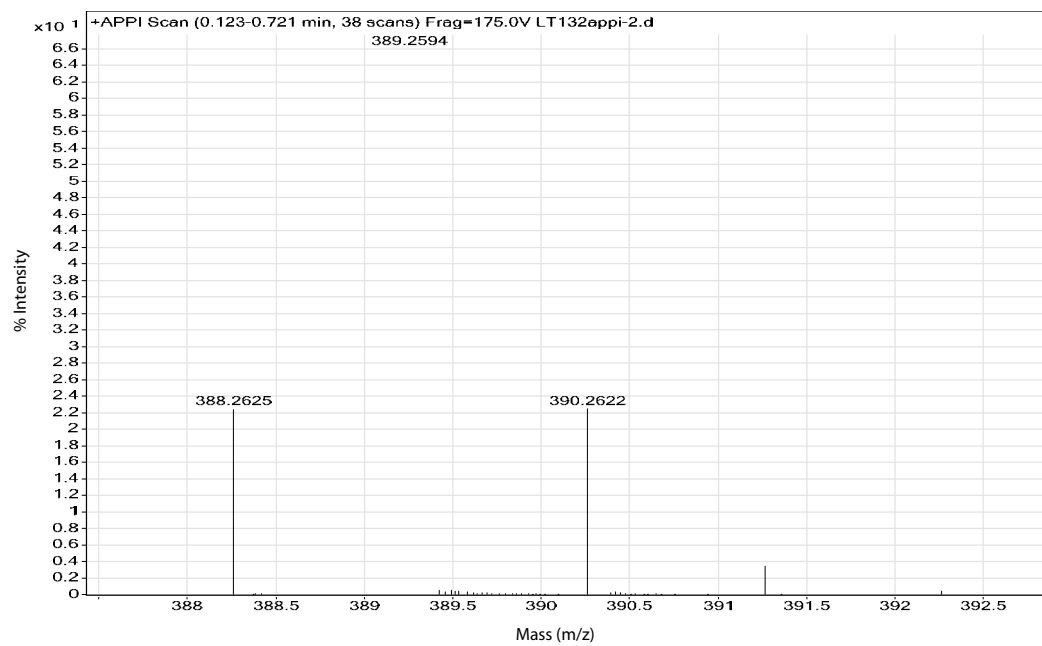

### p-2-ethylhexyloxy MIDA

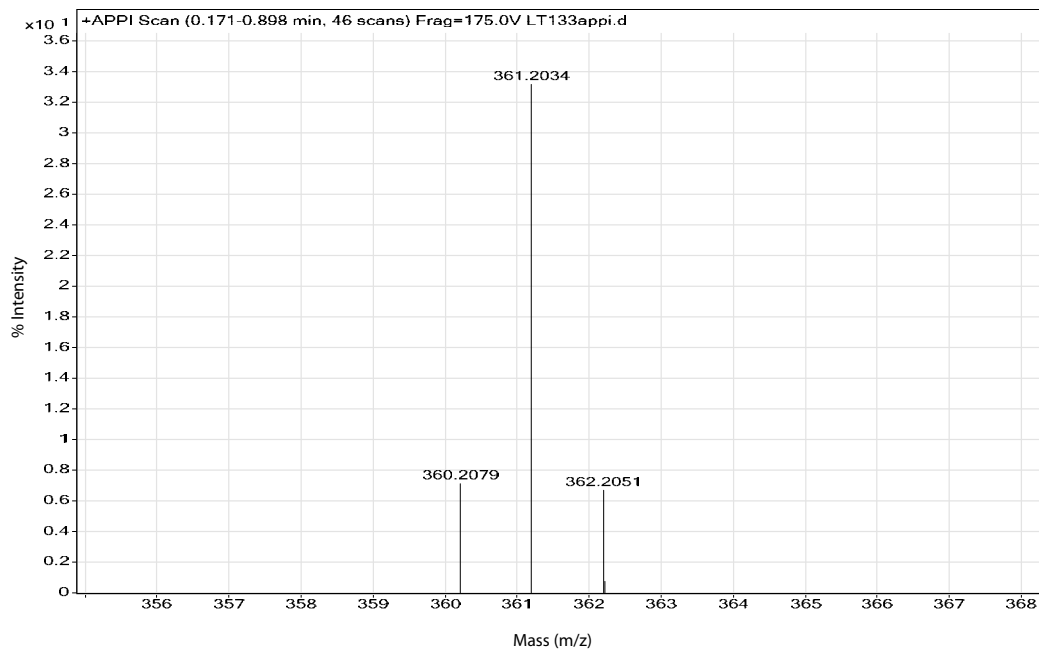

### 3,5-dihexyloxy MIDA

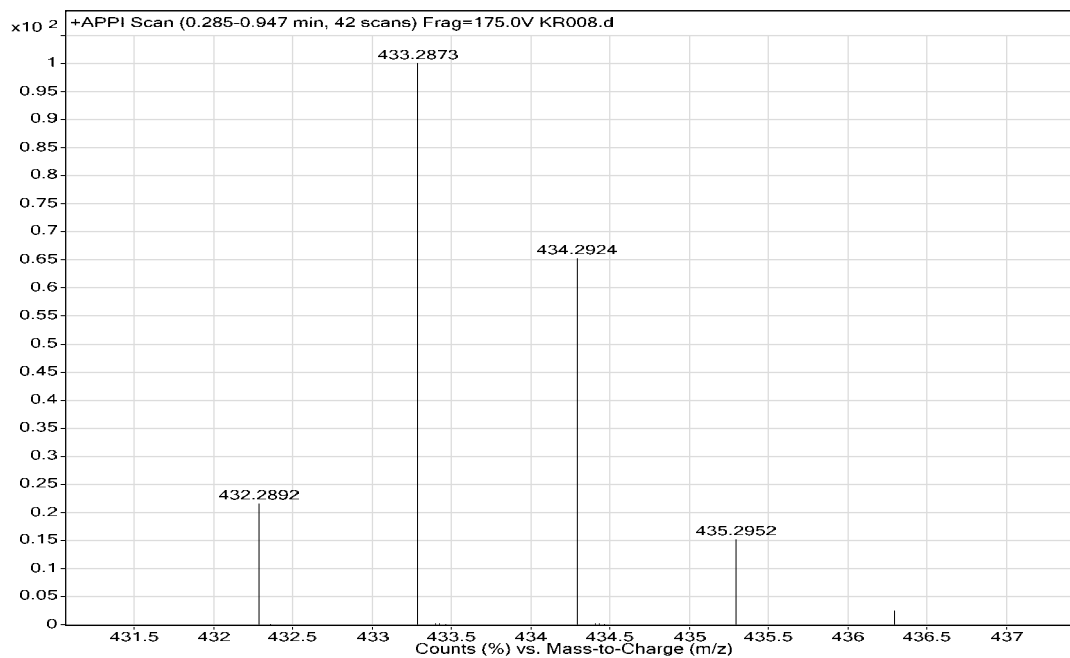

### 3,5-dioctyloxy MIDA

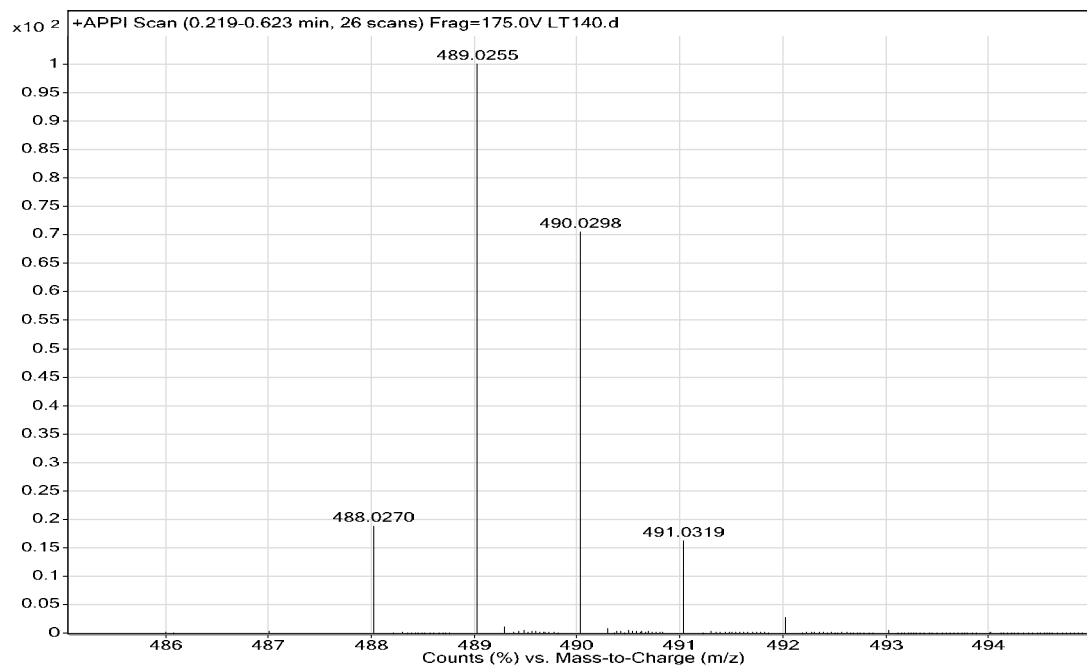

### 3,5-didecyloxy MIDA

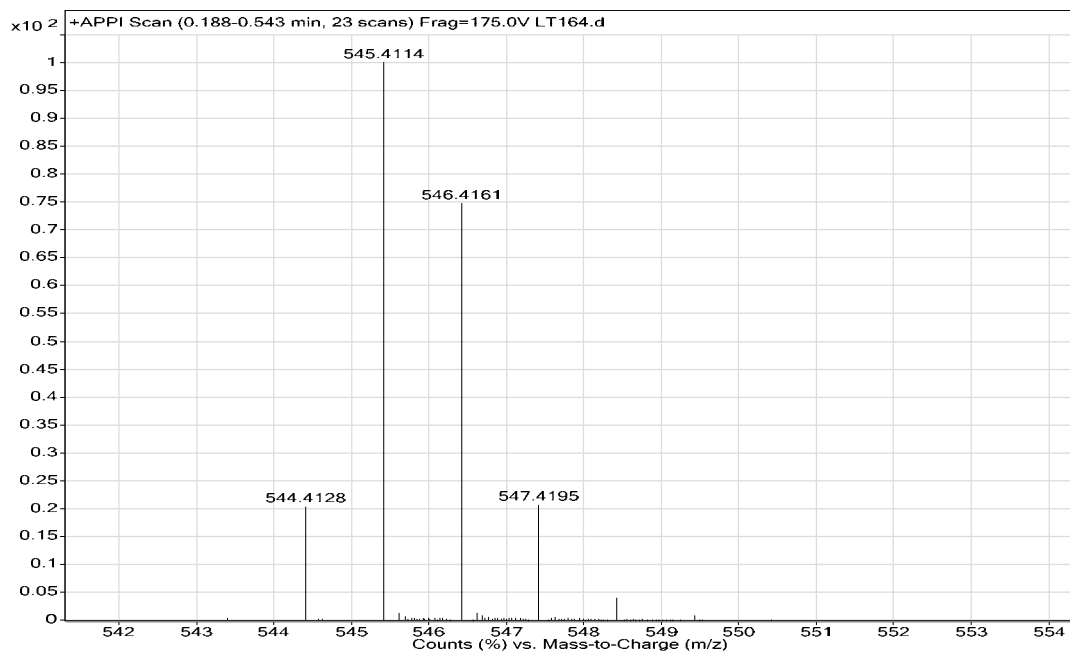

### 3,5-didodecyloxy MIDA

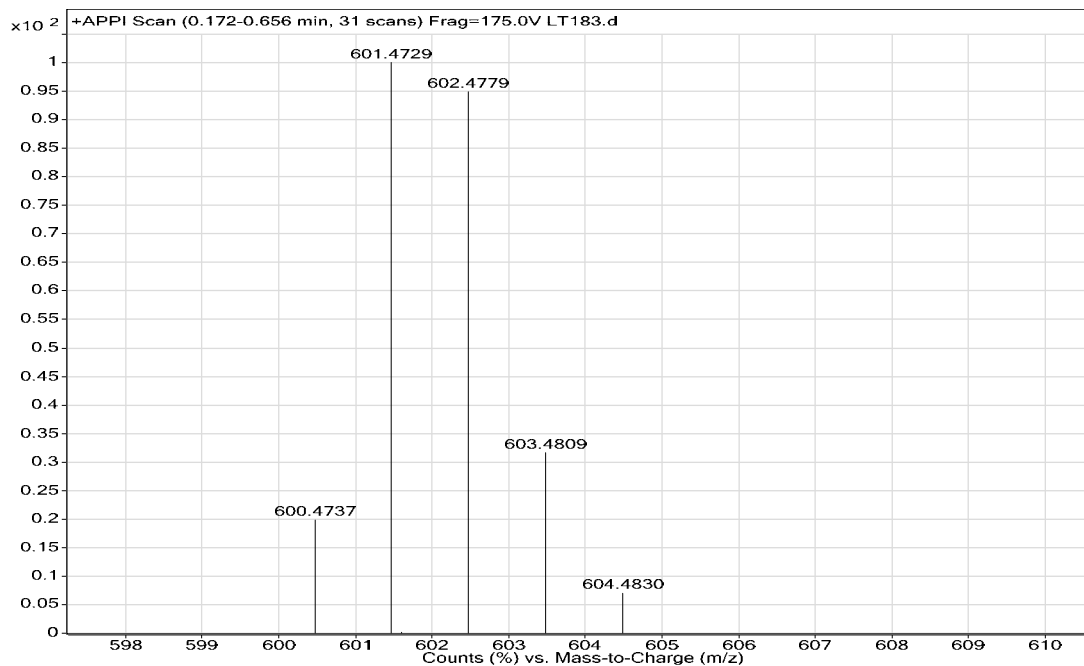

### 3,5-di(3,7-dimethyloctyloxy) MIDA

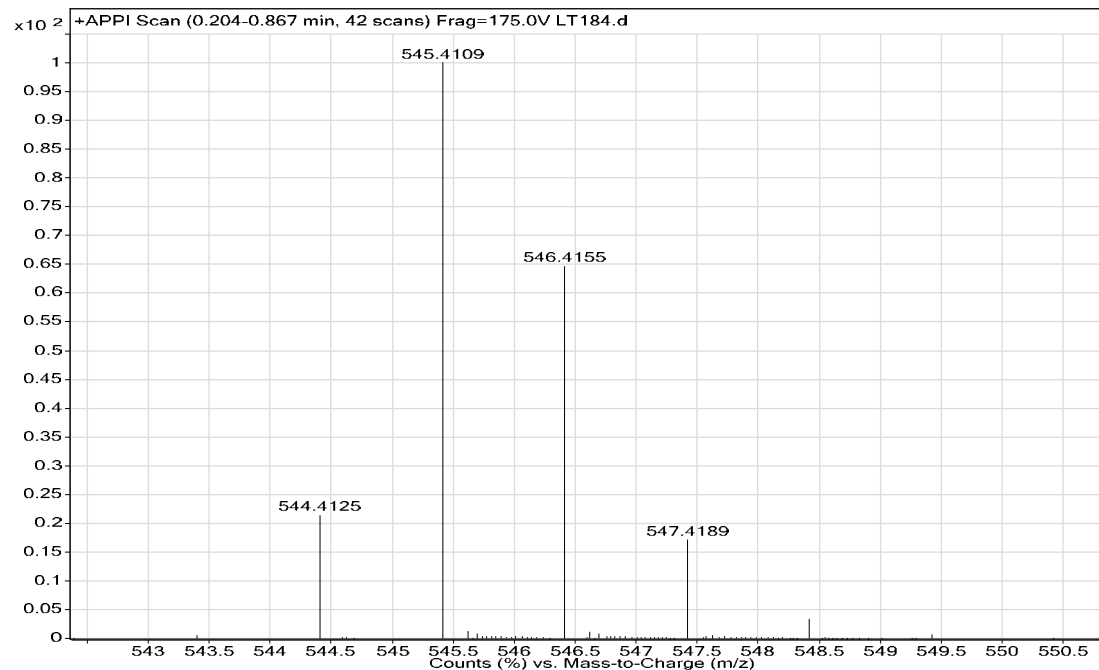

### 3,5-di(2-ethylhexyloxy) MIDA

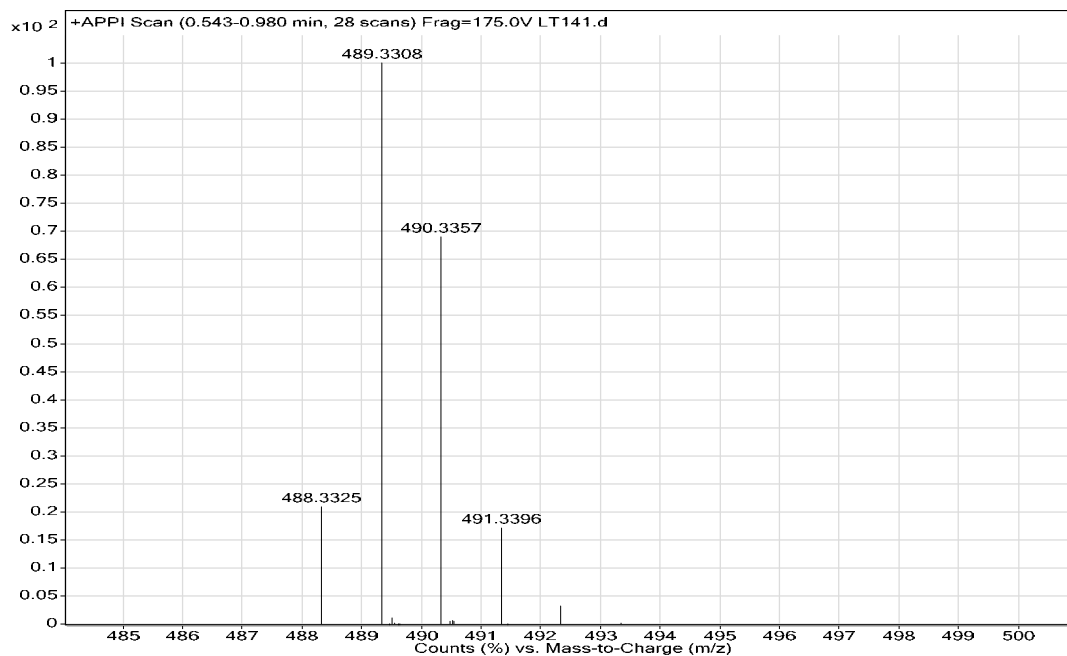

### p-hexyloxy discotic

Applied Biosystems 4700 Proteomics Analyzer 7007

4700 Reflector Spec #1[BP = 882.4, 24615]

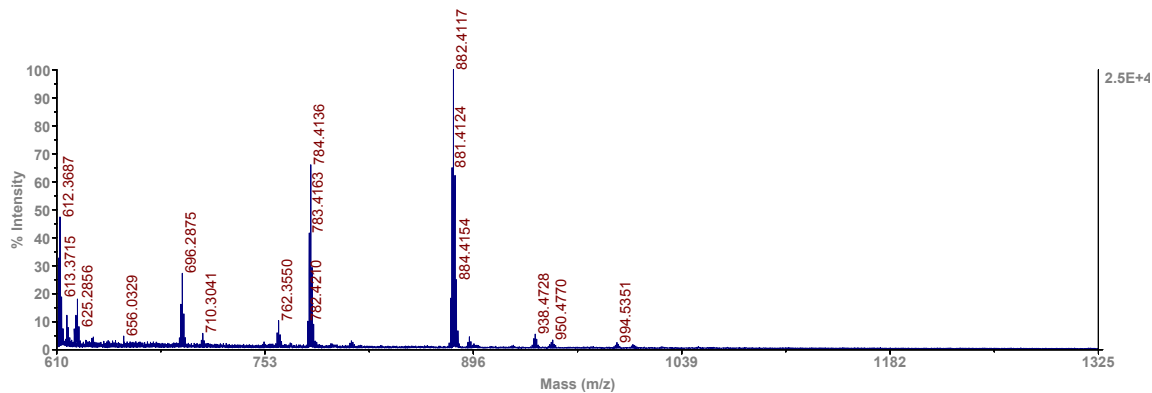

4700 Reflector Spec #1[BP = 882.4, 24615]

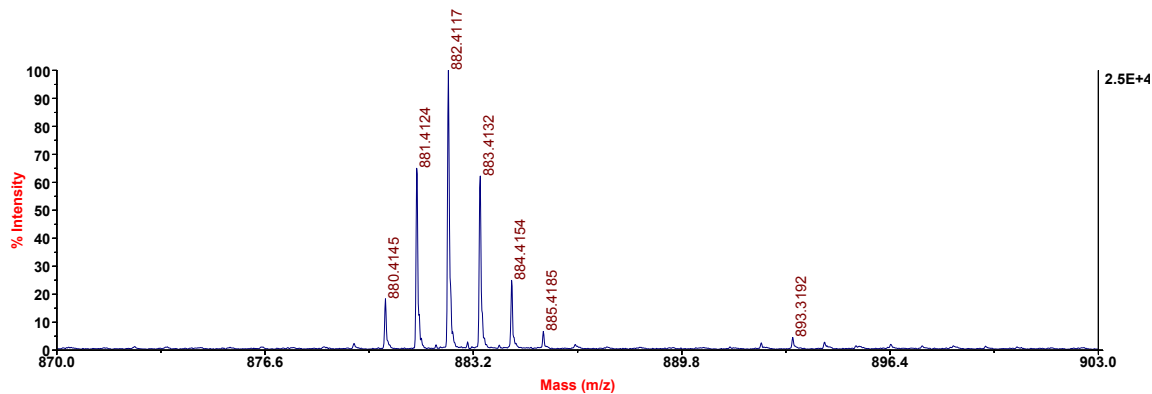

### p-octyloxy discotic

Applied Biosystems 4700 Proteomics Analyzer 7007

4700 Reflector Spec #1[BP = 966.5, 26406]

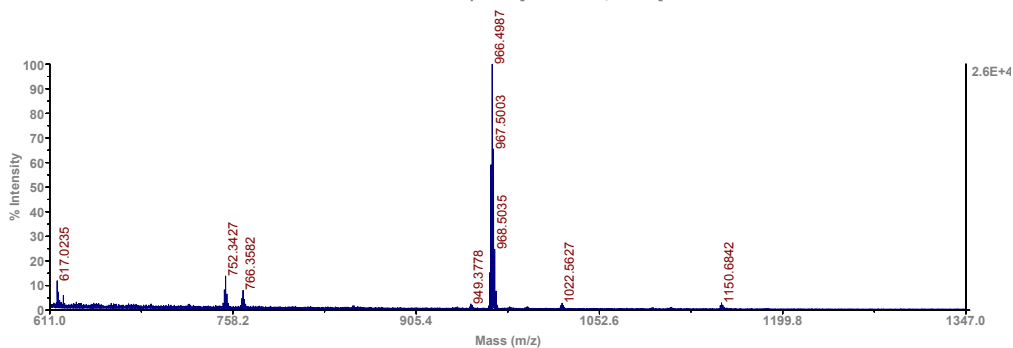

4700 Reflector Spec #1[BP = 966.5, 26406]

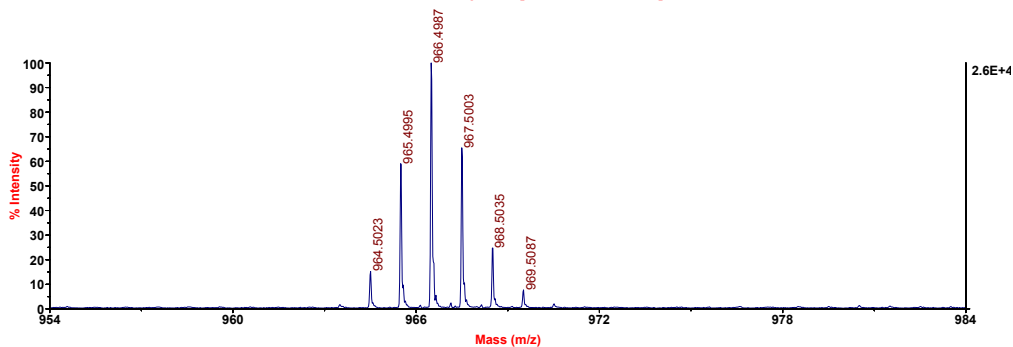

\\Ab347007007\renamed spectra data\KingiTatum\20110622LT149\_2.T2D

Printed: 12:19, June 24, 2011

### p-decyloxy discotic

Applied Biosystems 4700 Proteomics Analyzer 7007

4700 Reflector Spec #1[BP = 1050.6, 4684]

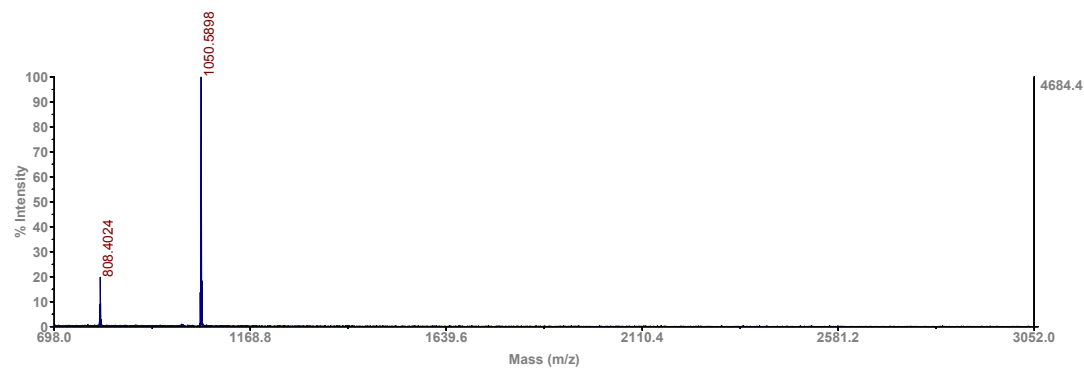

4700 Reflector Spec #1[BP = 1050.6, 4684]

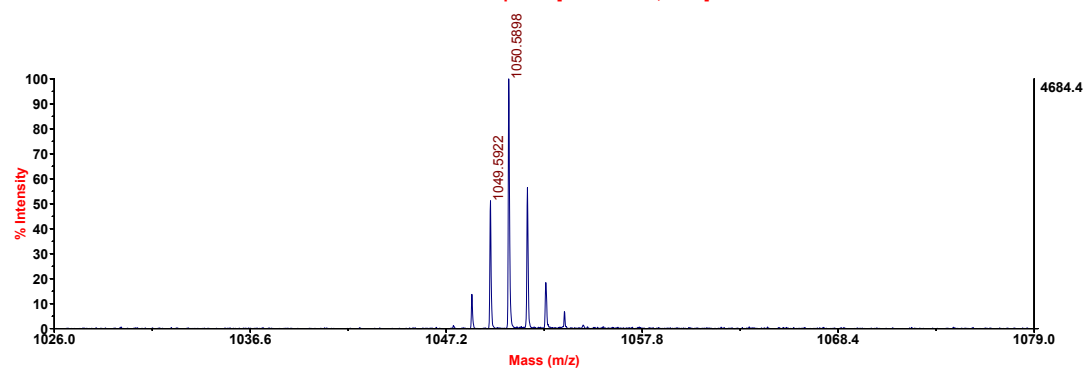

\\Ab347007007\renamed spectra data\KingiTatum\LT018.T2D

Printed: 16:58, March 02, 2011

### p-dodecyloxy discotic

Applied Biosystems 4700 Proteomics Analyzer 7007

4700 Reflector Spec #1[BP = 1134.7, 44113]

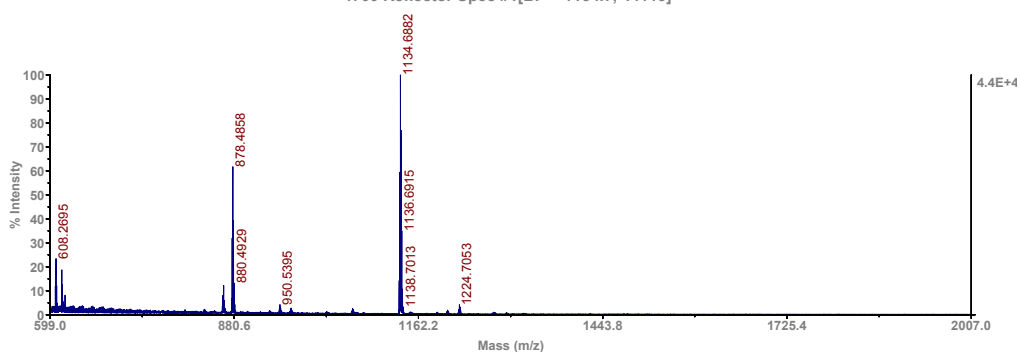

4700 Reflector Spec #1[BP = 1134.7, 44113]

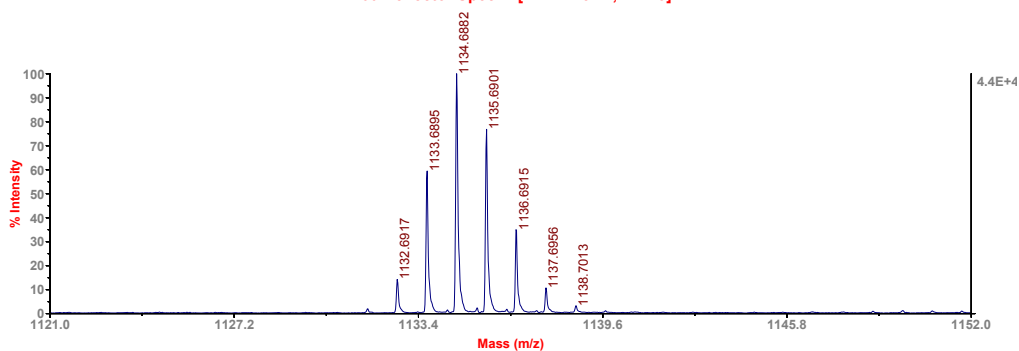

\\Ab347007007\renamed spectra data\King\Tatum\20110622\LT147.T2D

Printed: 11:30, June 24, 2011

### p-3,7-dimethyloxy discotic

Applied Biosystems 4700 Proteomics Analyzer 7007

4700 Reflector Spec #1[BP = 1050.6, 2700]

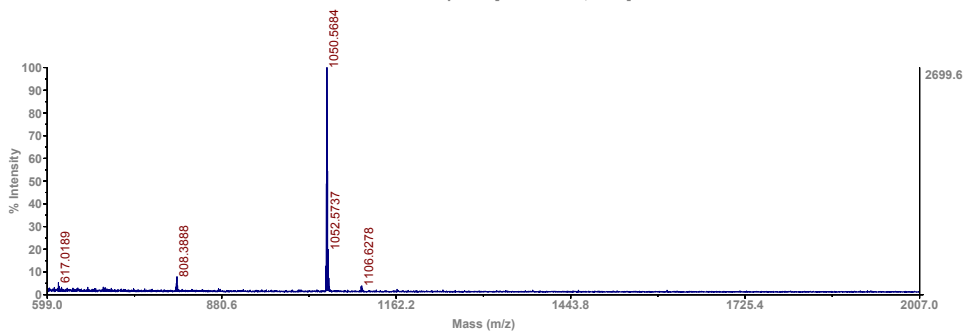

4700 Reflector Spec #1[BP = 1050.6, 2700]

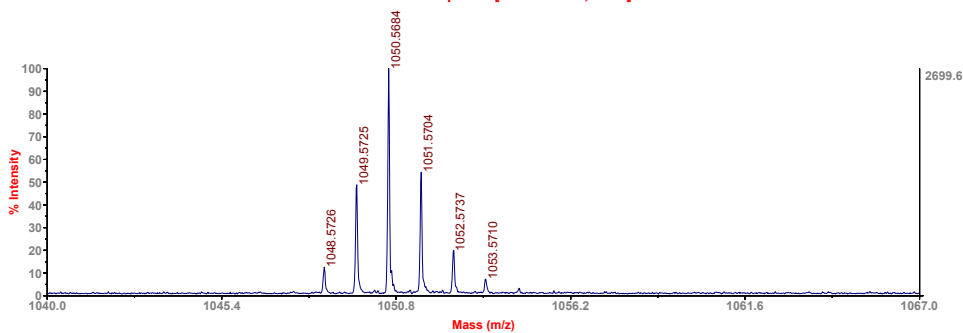

\\Ab347007007\renamed spectra data\King\Tatum\20110622\LT159.T2D

Printed: 11:44, June 24, 2011

### p-2-ethylhexyloxy discotic

Applied Biosystems 4700 Proteomics Analyzer 7007

4700 Reflector Spec #1[BP = 938.5, 20441]

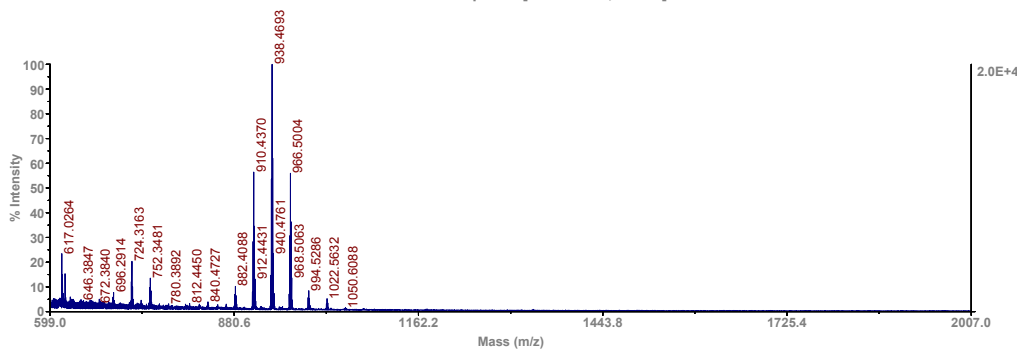

4700 Reflector Spec #1[BP = 938.5, 20441]

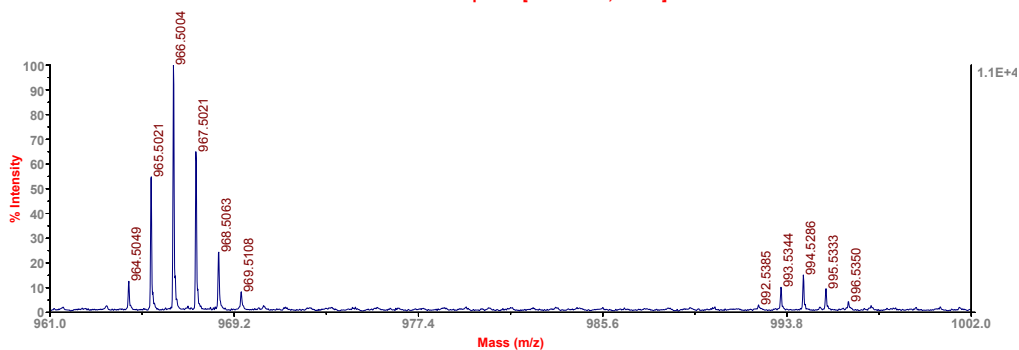

\\Ab347007007\renamed spectra data\King\Tatum\20110622\LT148.T2D

Printed: 12:18, June 24, 2011

### 3,5-dihexyloxy discotic

Applied Biosystems 4700 Proteomics Analyzer 7007

4700 Reflector Spec #1[BP = 610.3, 6062]

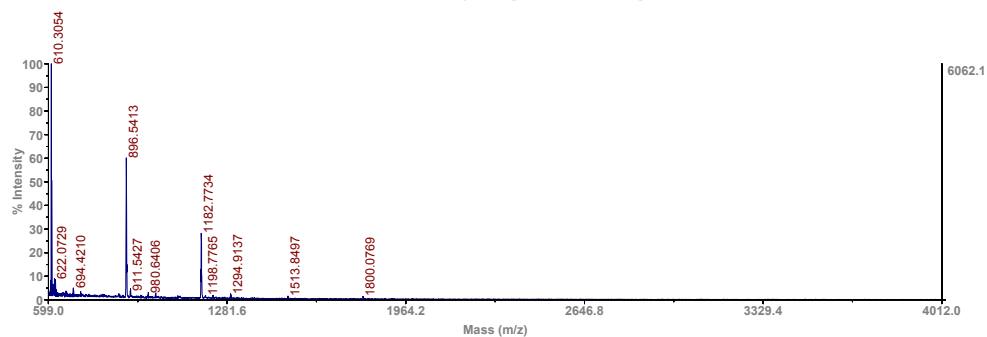

4700 Reflector Spec #1[BP = 610.3, 6062]

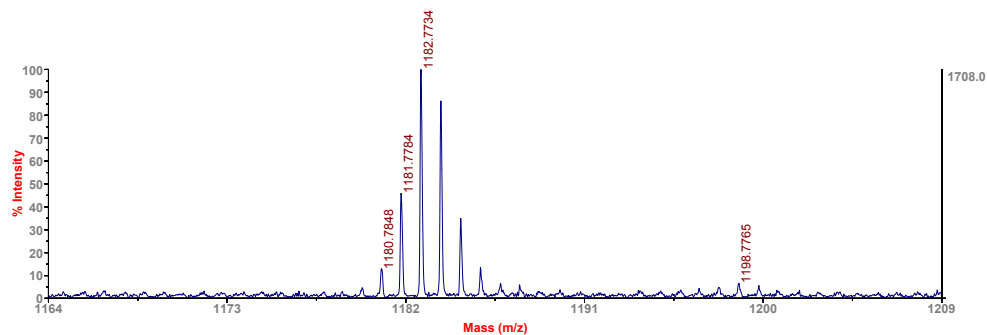

\\Ab347007007\renamed spectra data\King\Tatum\20110908\LT 181 with matrix.T2D

Printed: 16:13, September 09, 2011



### 3,5-dioctyloxy discotic

Applied Biosystems 4700 Proteomics Analyzer 7007

4700 Reflector Spec #1[BP = 966.5, 26406]

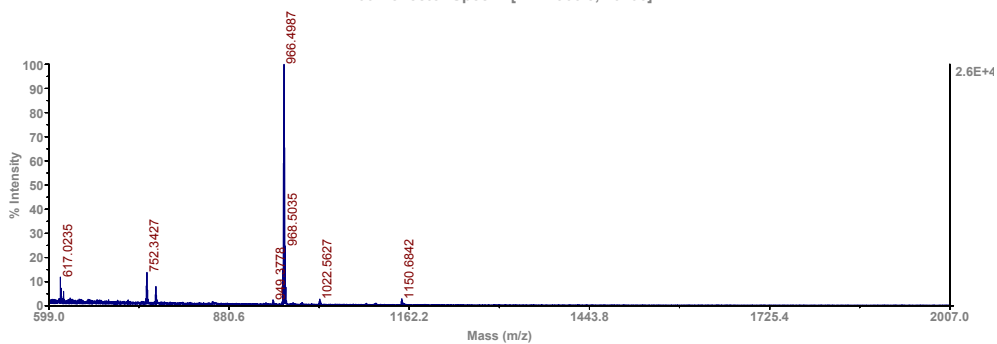

4700 Reflector Spec #1[BP = 966.5, 26406]

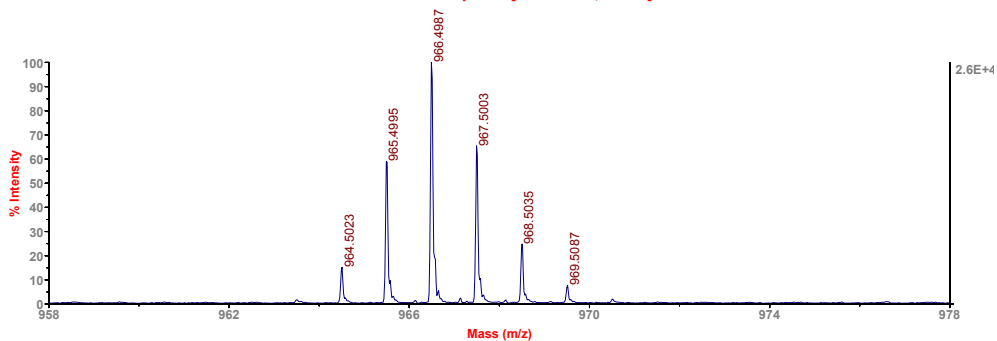

\\Ab347007007\renamed spectra data\King\Tatum\20110622\LT165.T2D

Printed: 11:47, June 24, 2011

### 3,5-didecyloxy discotic

Applied Biosystems 4700 Proteomics Analyzer 7007

4700 Reflector Spec #1[BP = 722.4, 12632]

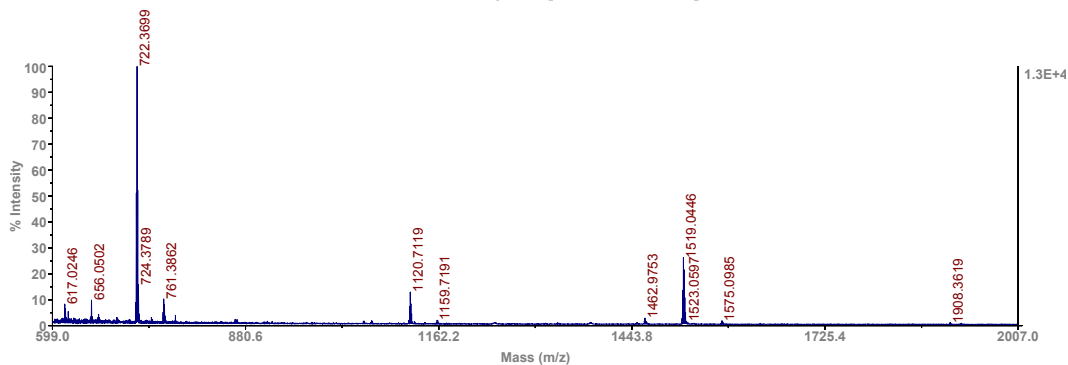

4700 Reflector Spec #1[BP = 722.4, 12632]

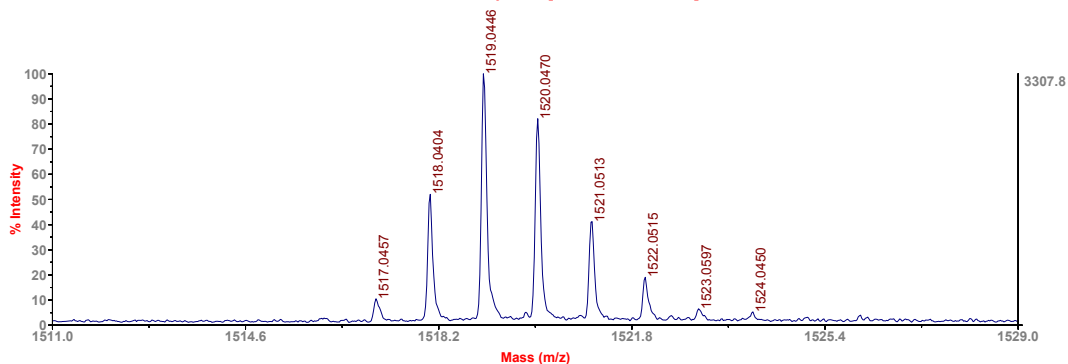

\\Ab347007007\renamed spectra data\King\Tatum\20110622\LT167.T2D

Printed: 12:13, June 24, 2011

### 3,5-didodecyloxy discotic

Applied Biosystems 4700 Proteomics Analyzer 7007

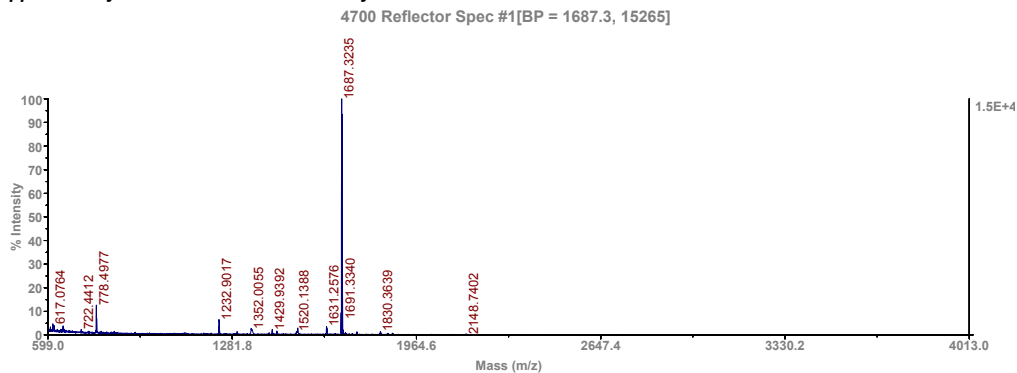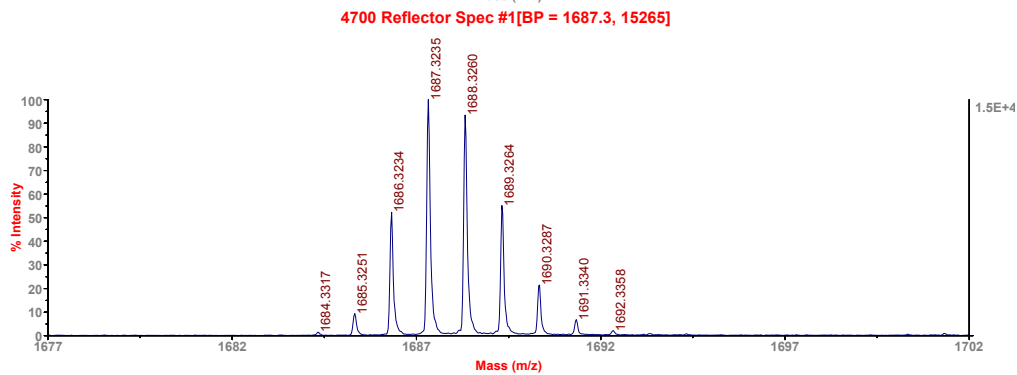

\\Ab347007007\renamed spectra data\King\Tatum\20110908\LT 186 with matrix.T2D

Printed: 16:15, September 09, 2011

### 3,5-di(3,7-dimethyloxy) discotic

Applied Biosystems 4700 Proteomics Analyzer 7007

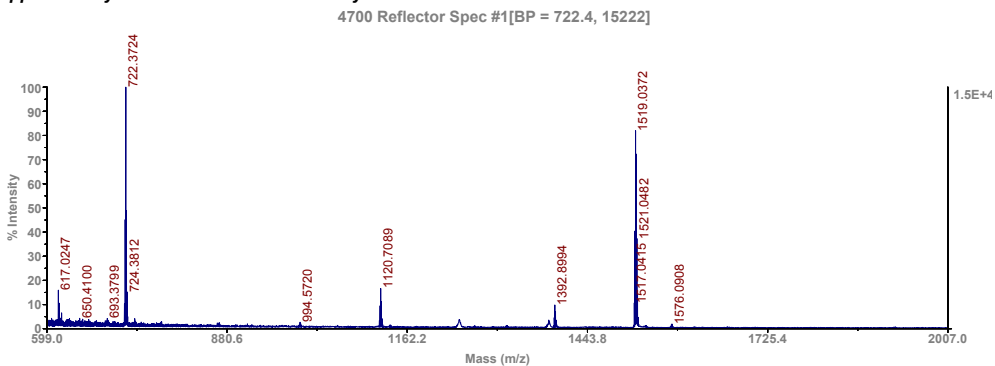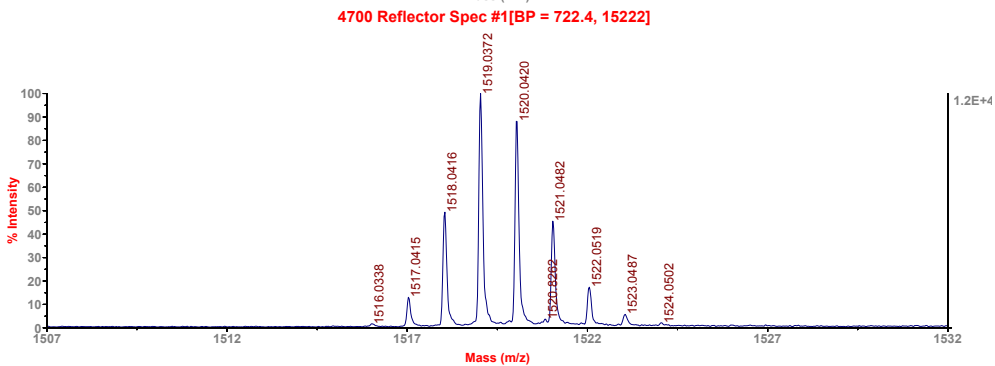

\\Ab347007007\renamed spectra data\King\Tatum\20110622\LT157.T2D

Printed: 11:40, June 24, 2011

### 3,5-di(2-ethylhexyloxy) discotic

Applied Biosystems 4700 Proteomics Analyzer 7007

4700 Reflector Spec #1[BP = 1350.9, 11904]

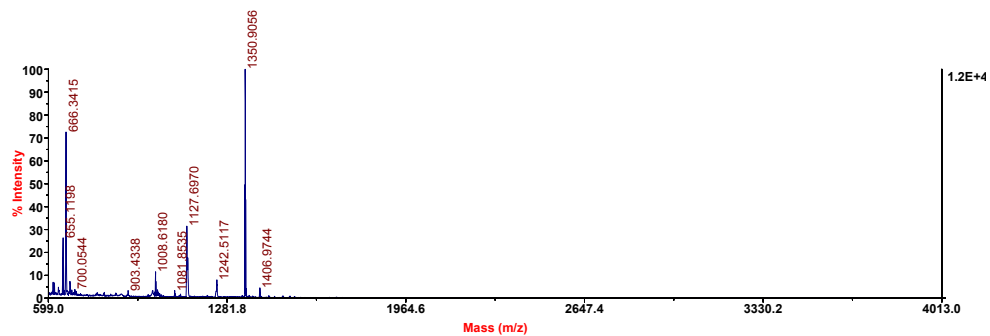

4700 Reflector Spec #1[BP = 1350.9, 11904]

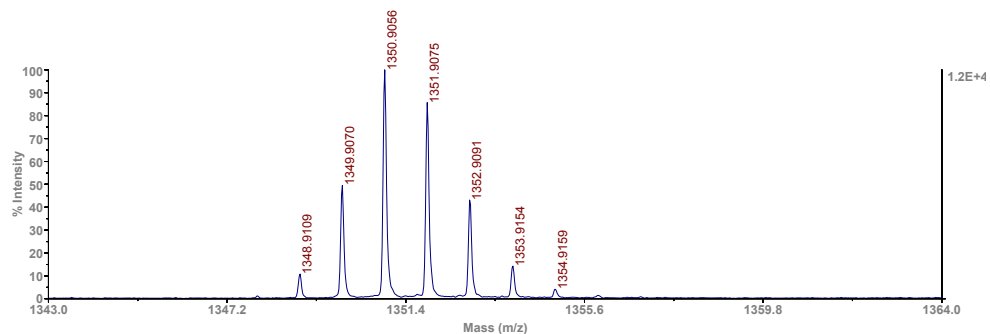

\\Ab347007007\renamed spectra data\King\Tatum\20110908\LT 142 with matrix.T2D

Printed: 16:14, September 09, 2011

**IR**

**p-hexyloxy bromide**

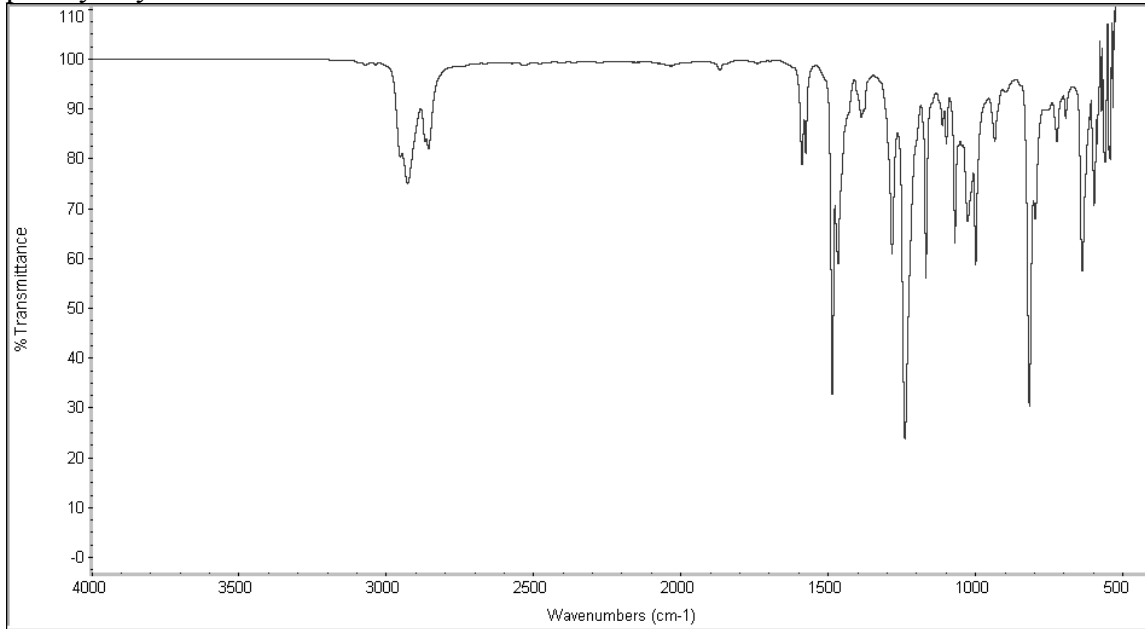

**3,5-di(3,7-dimethyloctyloxy) bromide**

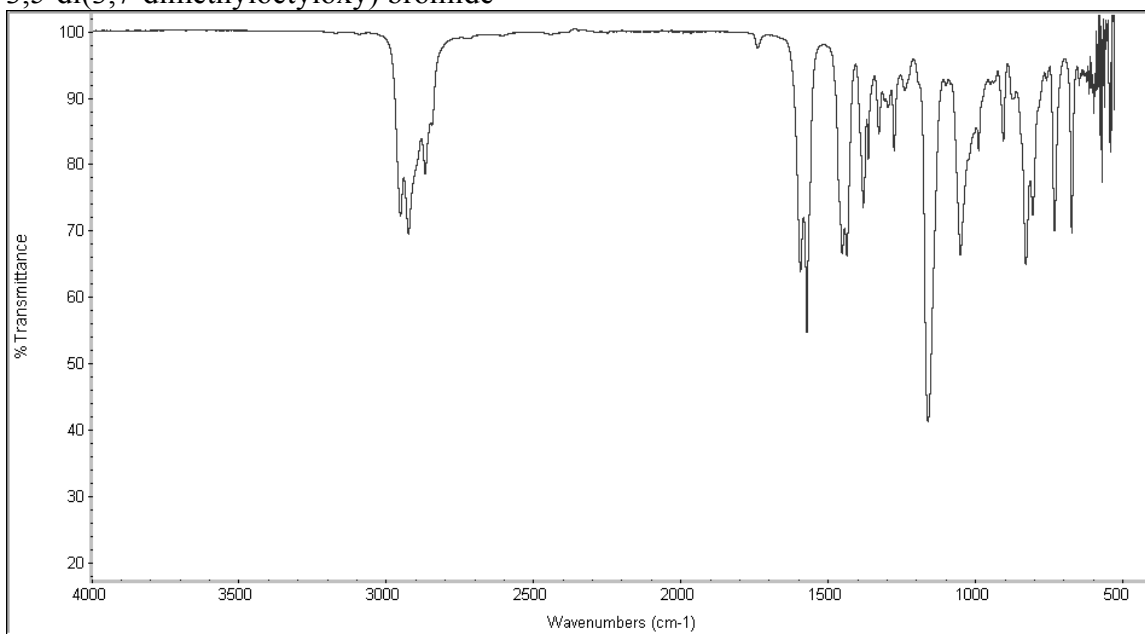

p-decyloxy MIDA

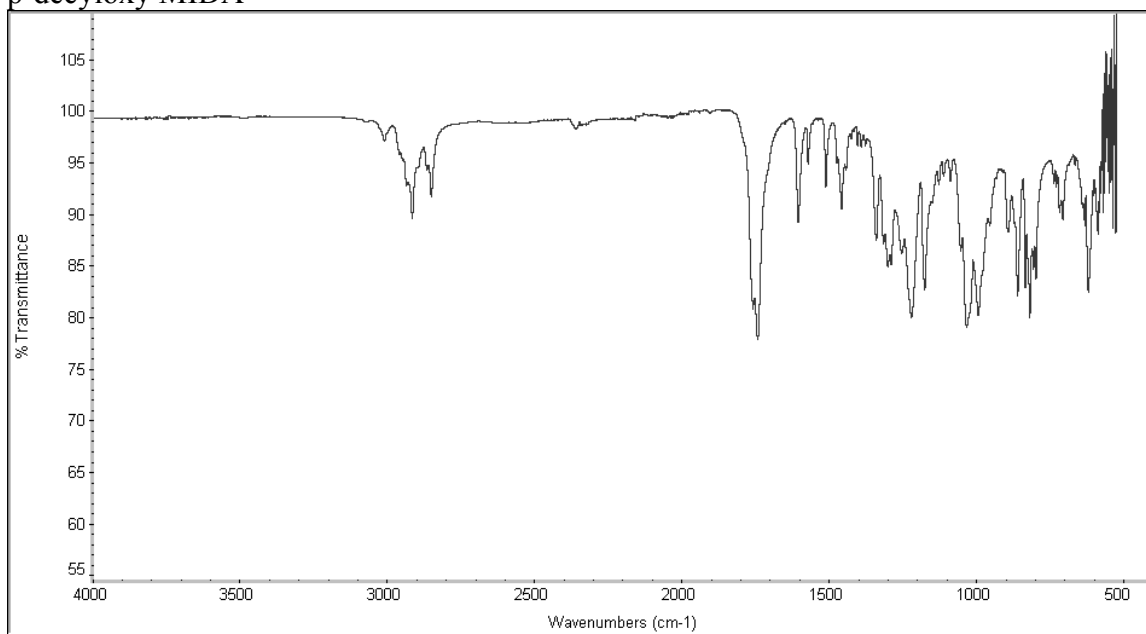

3,5-di(3,7-dimethyloctyloxy) MIDA

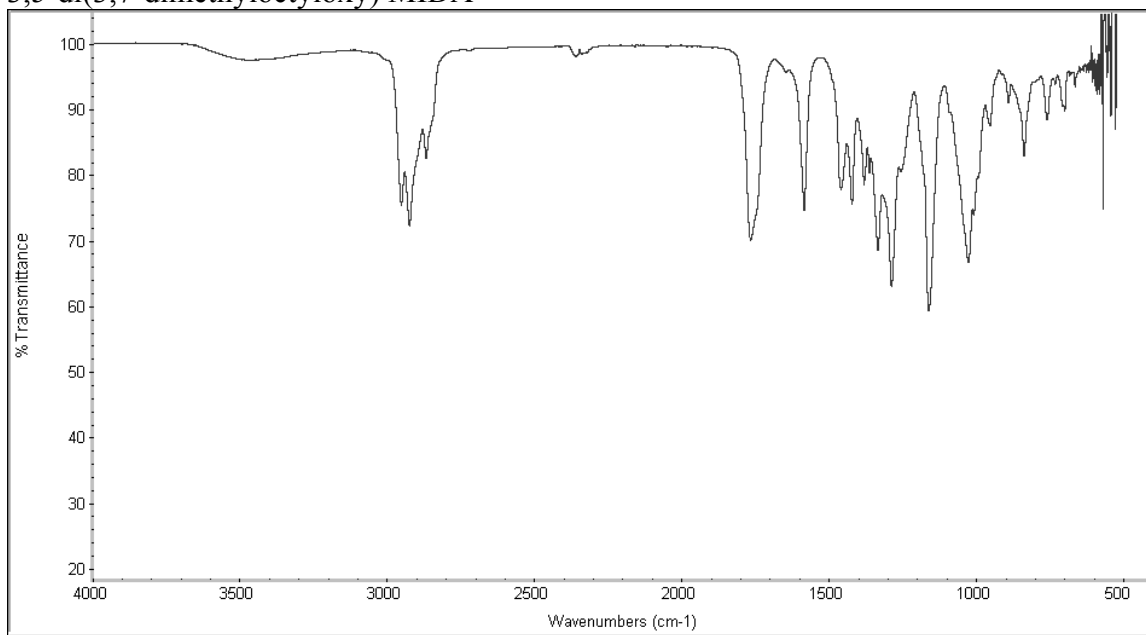

p-decyloxy discotic

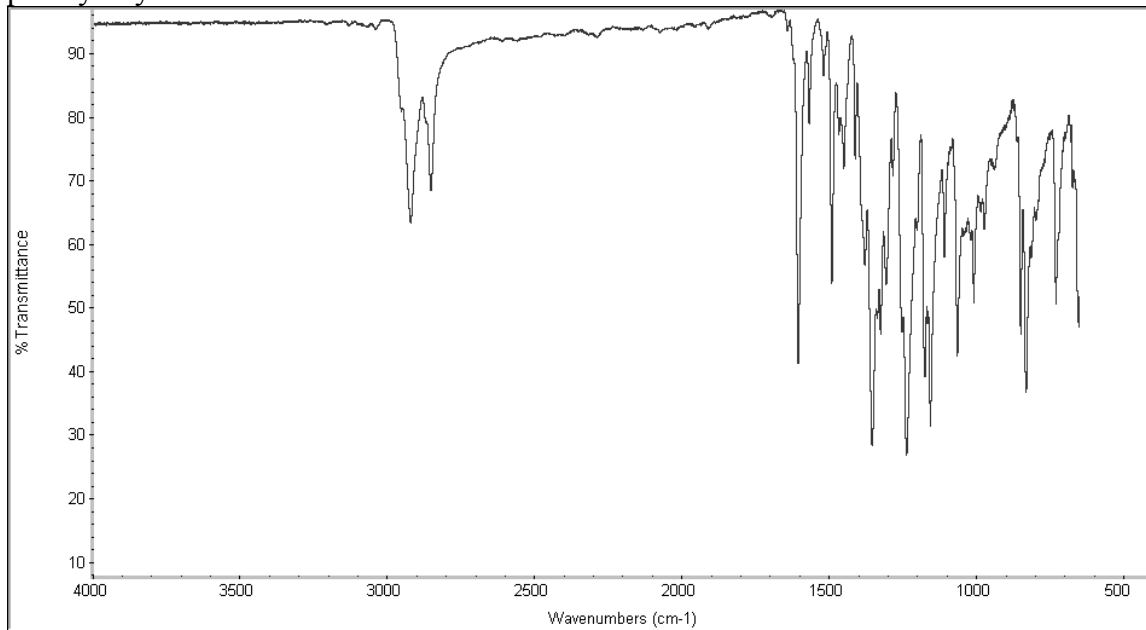

3,5-di(3,7-dimethyloctyloxy) discotic

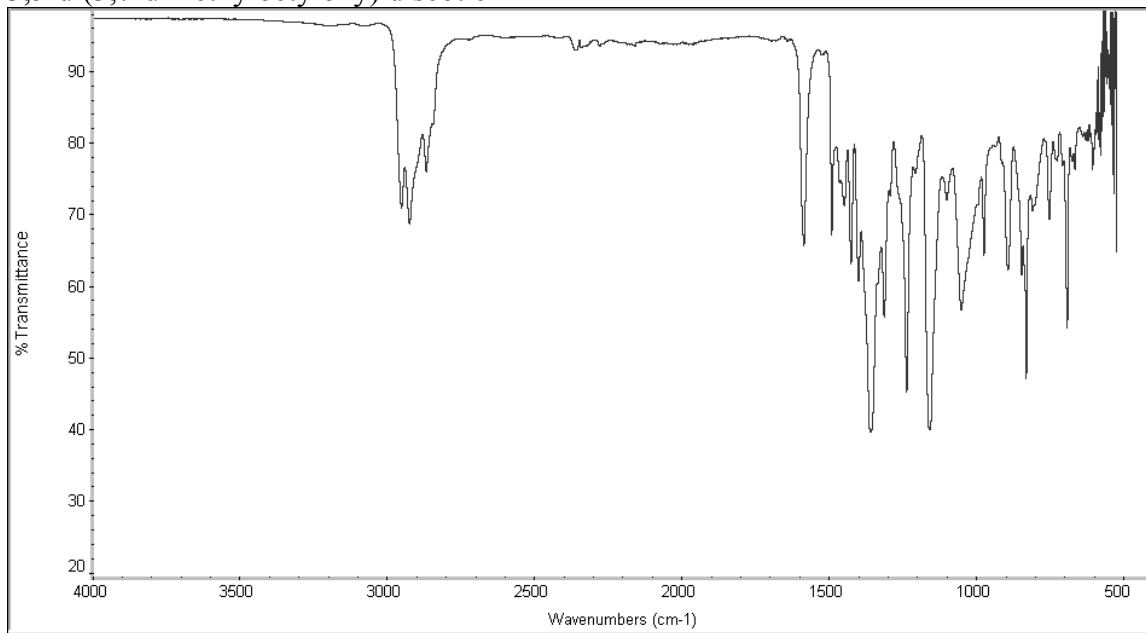

**UV**  
p-decyloxy discotic

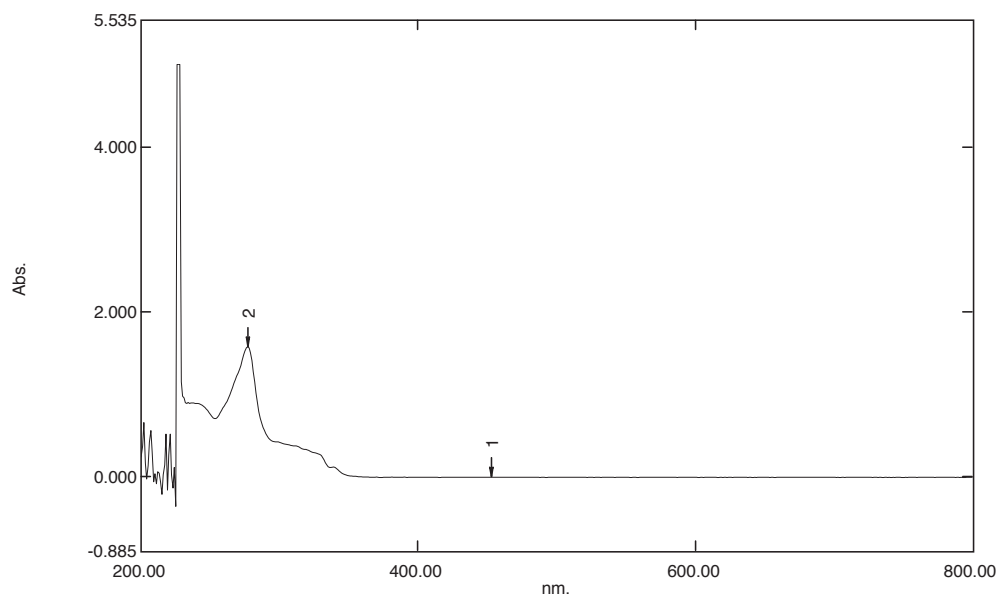

### 3,5-di(3,7-dimethyloctyloxy) discotic

## Overlay Spectrum Graph Report

07/19/2011 12:54:09 PM

LT185 - RawData - Z:\uvvis\data\King\ltatum\LT185.spc

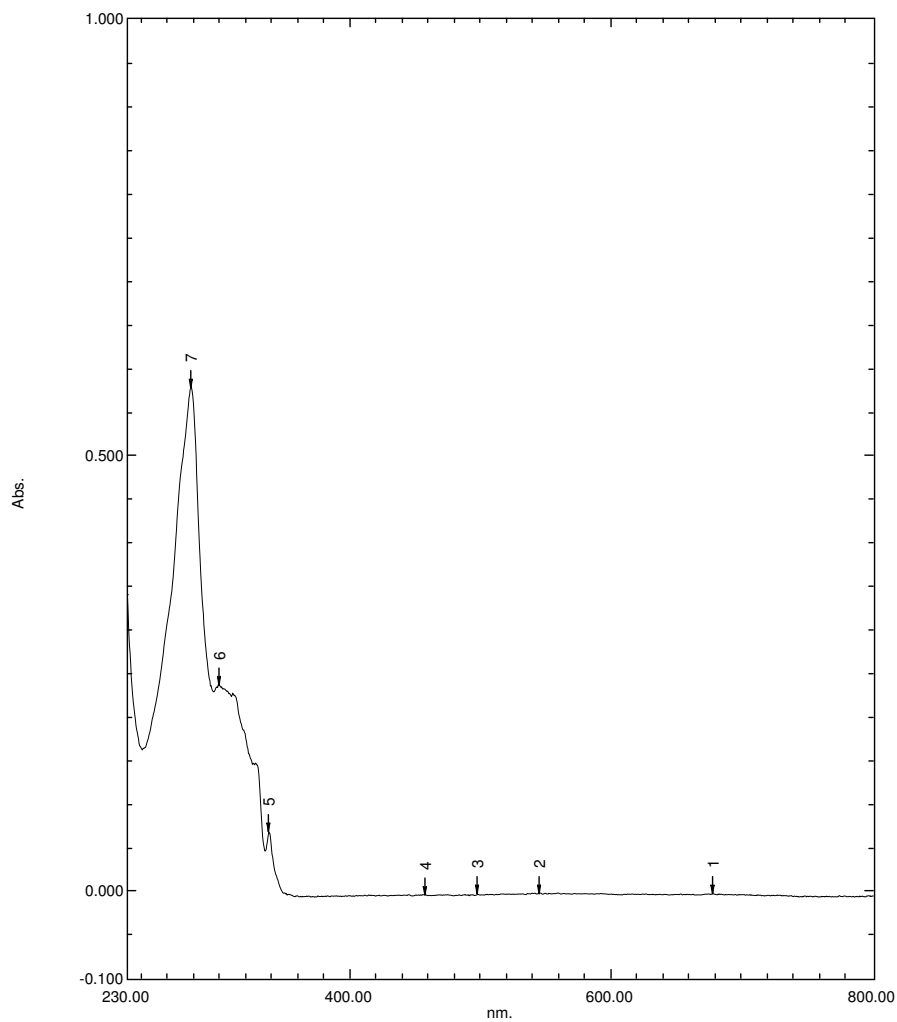

Page 1 / 1



## DSC

Melting points of non-liquid crystalline discotics along with DSC traces of those found to be liquid crystalline are reported.

| Compound  | Thermal Behavior                   |
|-----------|------------------------------------|
| <b>4a</b> | Cr 174 °C Iso                      |
| <b>4b</b> | Cr 158 °C Iso                      |
| <b>4c</b> | Cr 140 Col <sub>h</sub> °C 200 Iso |
| <b>4d</b> | Cr 80 Col <sub>h</sub> °C 197 Iso  |
| <b>4e</b> | Cr 82 °C Iso                       |
| <b>4f</b> | Cr 156 °C Iso                      |
| <b>4g</b> | Cr 138 °C Iso                      |
| <b>4h</b> | Cr 127 °C Iso                      |
| <b>4i</b> | Cr 120 °C Iso                      |
| <b>4j</b> | Cr 45 Col <sub>h</sub> °C 80 Iso   |
| <b>4k</b> | Col <sub>h</sub> 200 °C Iso        |
| <b>4l</b> | Glassy solid 160 °C Iso            |

### 4a p-hexyloxy discotic

DSC

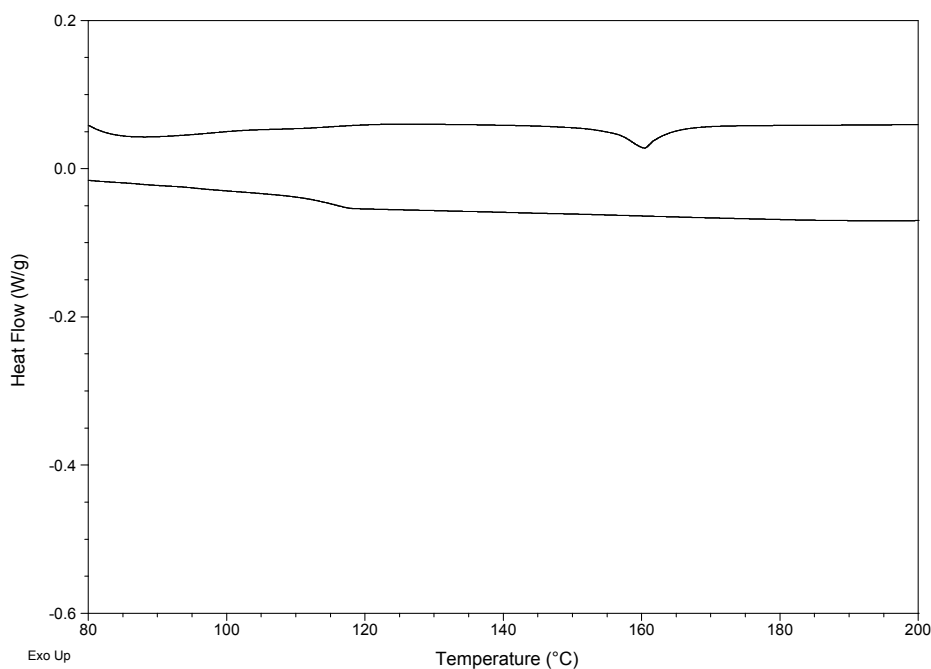

### 4b p-octyloxy discotic

DSC

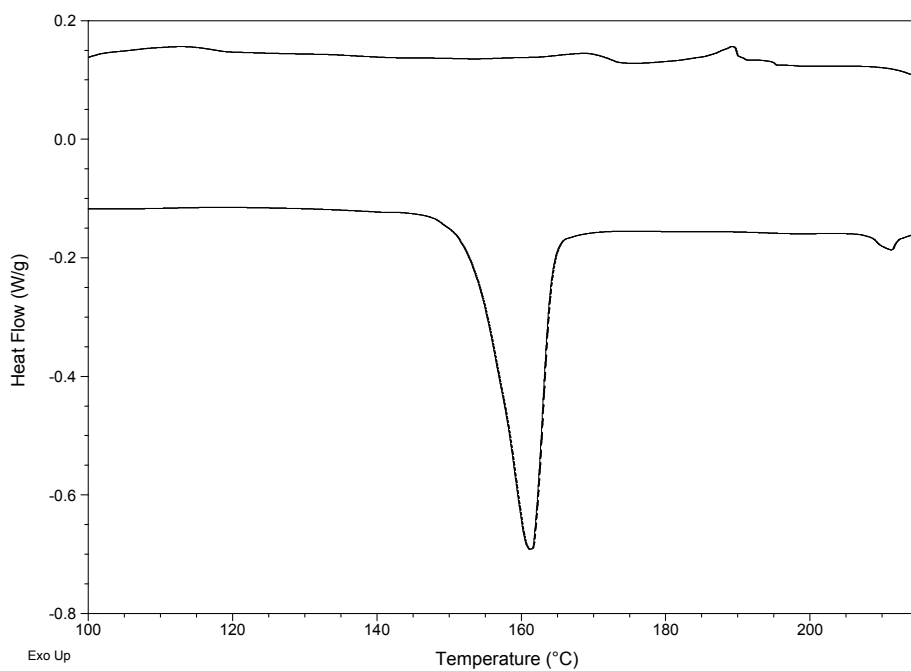

**4c** p-decyloxy discotic

DSC

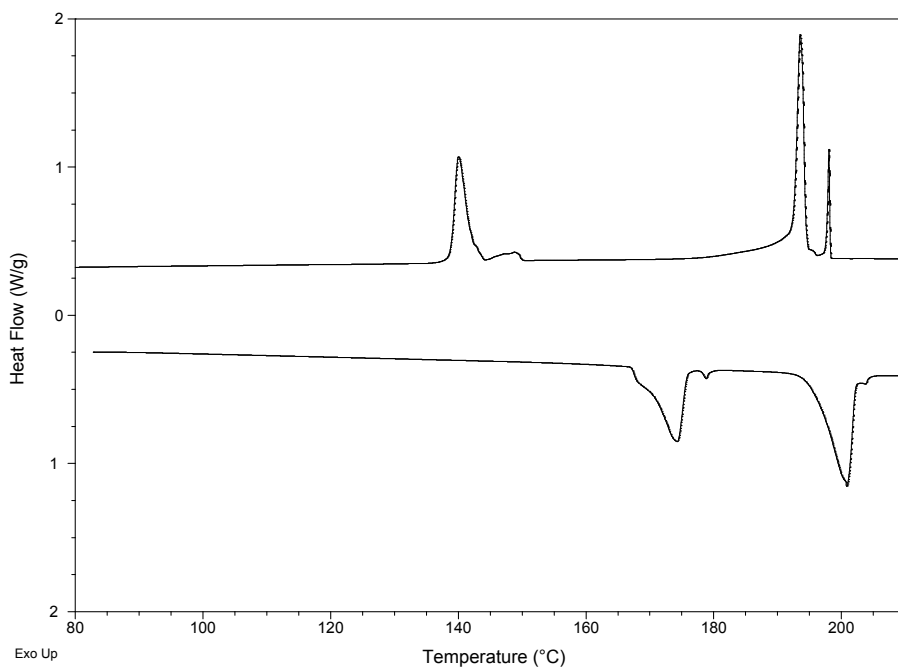

**4d** p-dodecyloxy discotic

DSC

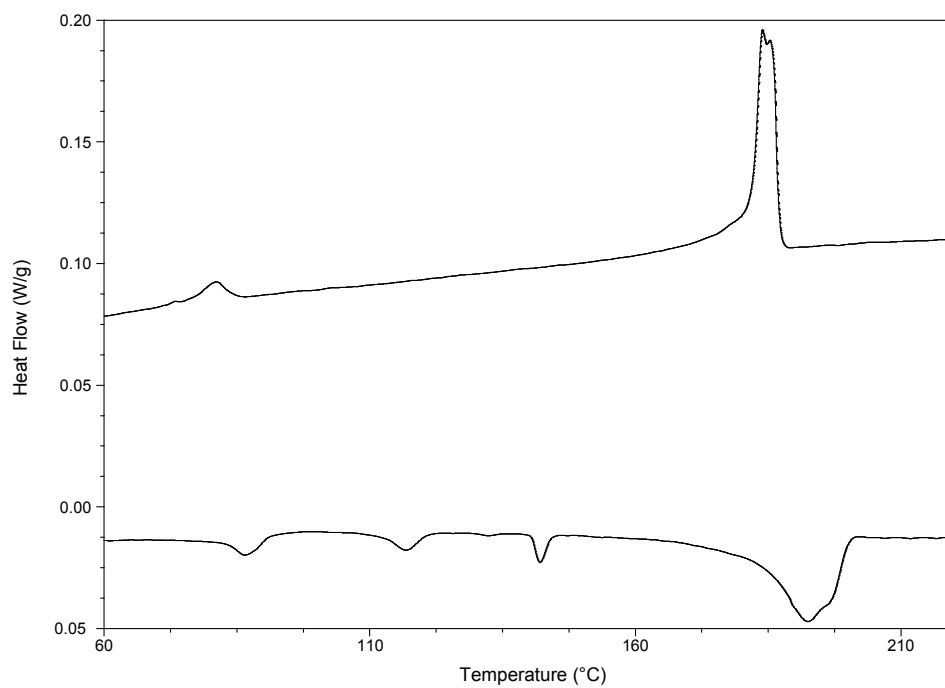

**4e** p-(3,7-dimethyloctyloxy) discotic

DSC

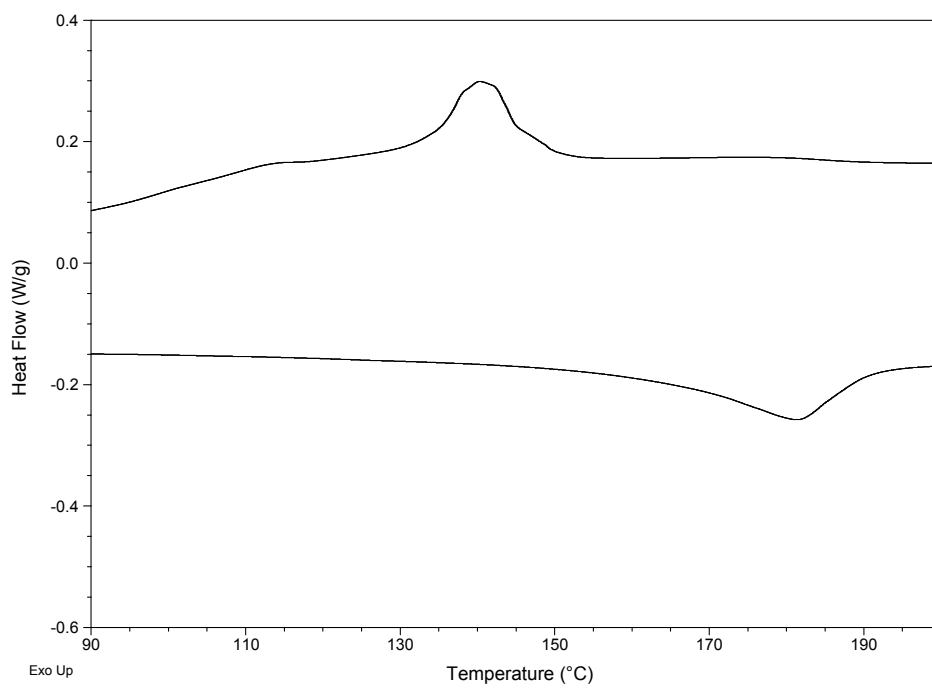

**4f** p-(2-ethylhexyloxy) discotic

DSC

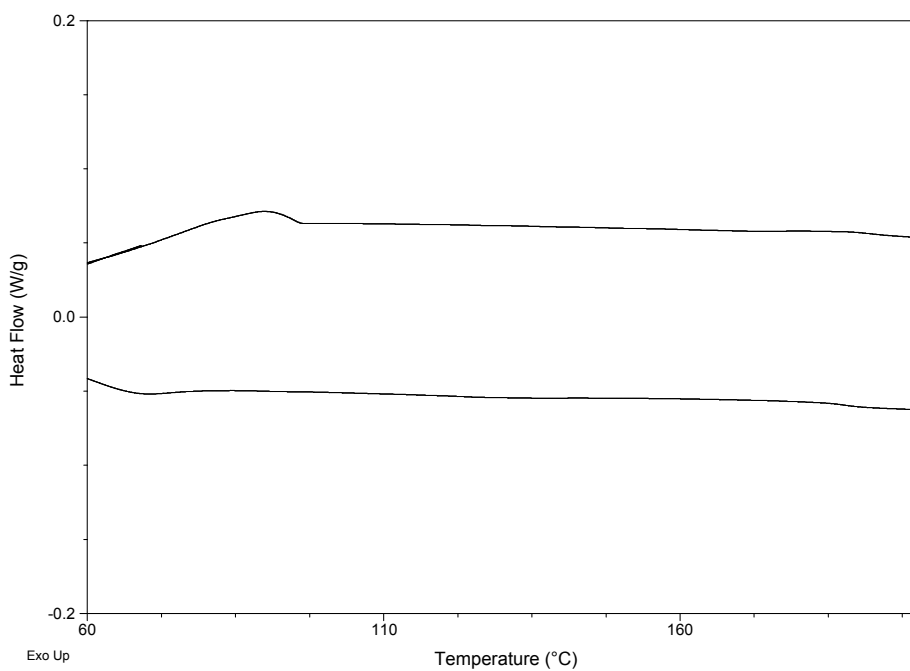

**4g** 3,5-dihexyloxy discotic

DSC

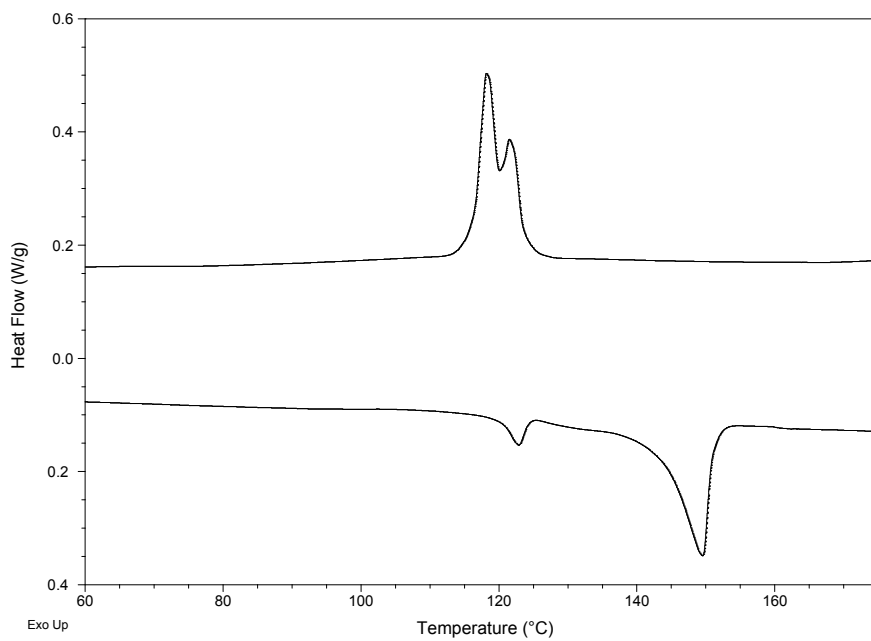

**4h** 3,5-dioctyloxy discotic

DSC

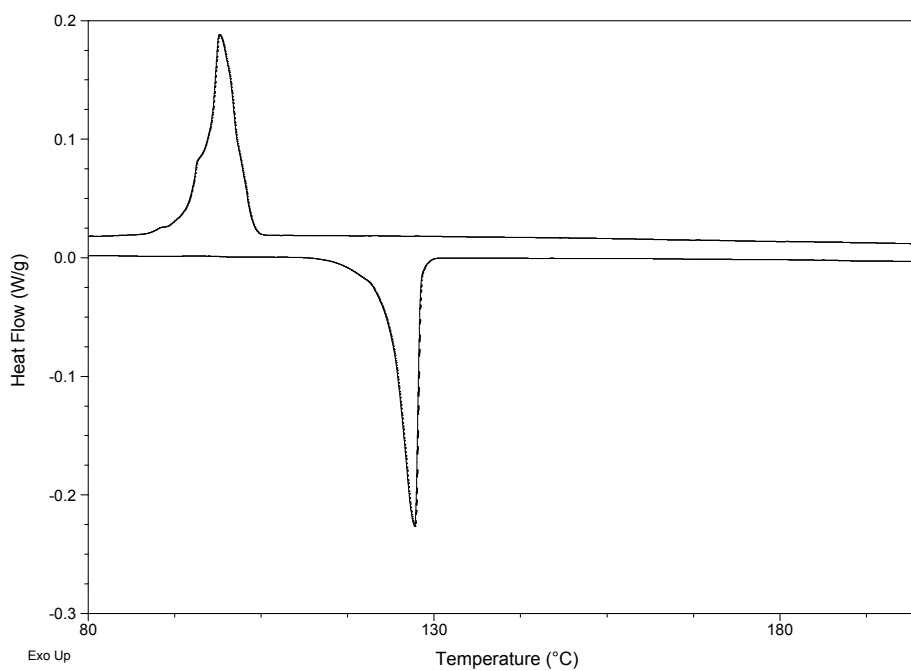

**4i** 3,5-didecyloxy discotic

DSC

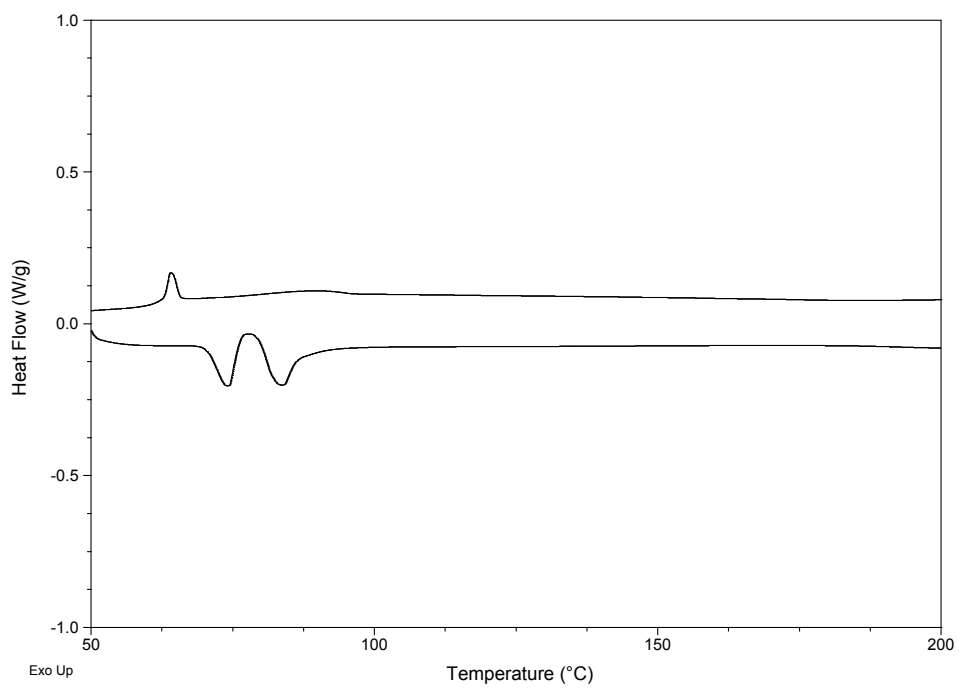

**4j** 3,5-didodecyloxy discotic

DSC

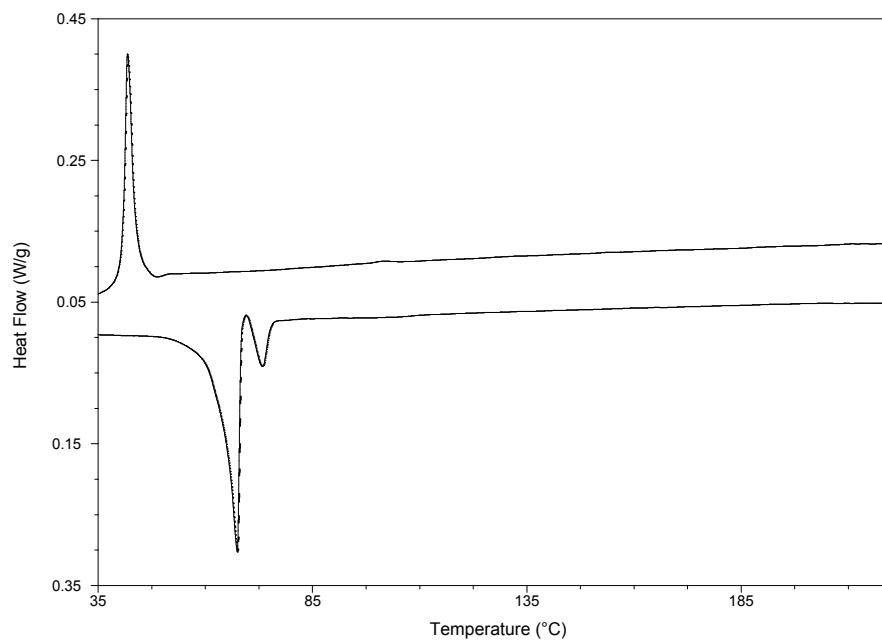

**4k** 3,5-di(3,7-dimethyloxy) discotic

DSC

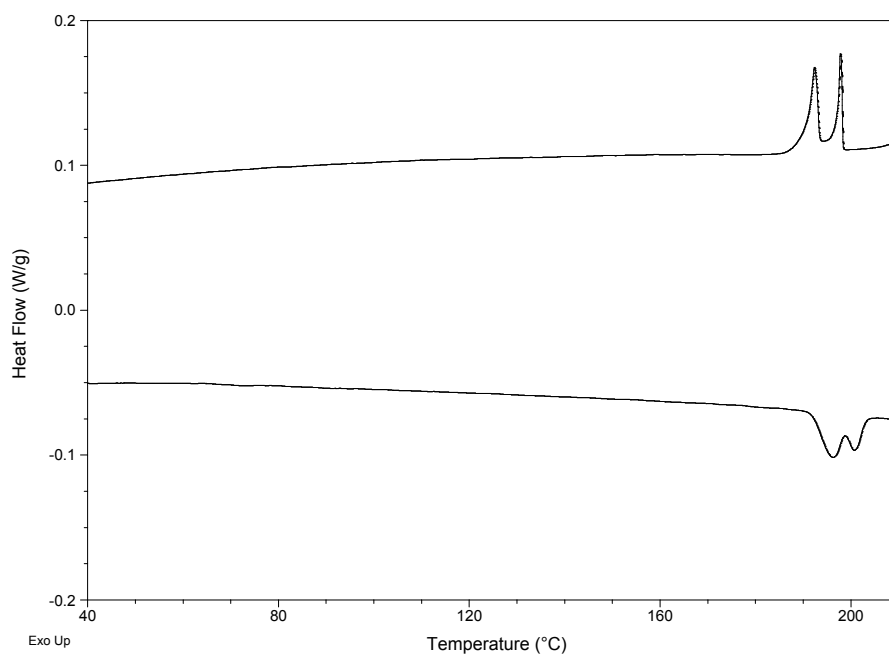

**4l** 3,5-di(2-ethylhexyloxy) discotic

### DSC

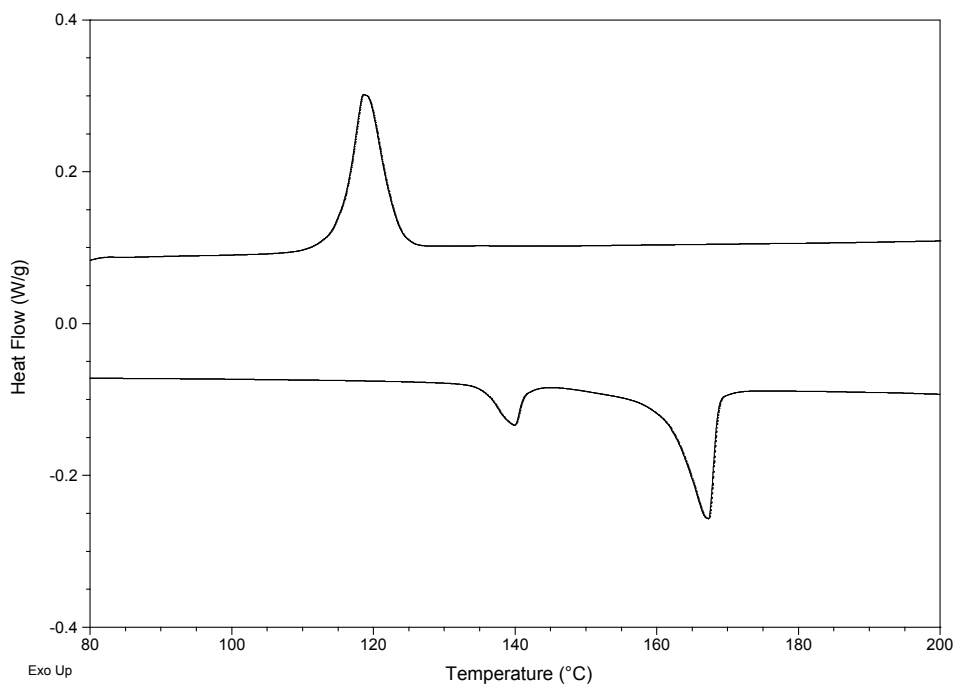

## DLC Stability

DLCs **4c**, and **4k** were submitted to 3 thermal cycles in a DSC under N<sub>2</sub> from room temperature to 250° C, neither showed evidence of decomposition by NMR. Addition of protic solvents to DLCs **4c**, and **4k** cleaved the boronic ester linkages. Compound **4k** was also left out in a vial on the bench top under ambient conditions and showed no major decomposition.

### **4c** p-decyloxy discotic before DSC

p-decyloxyTPDLCdiluted

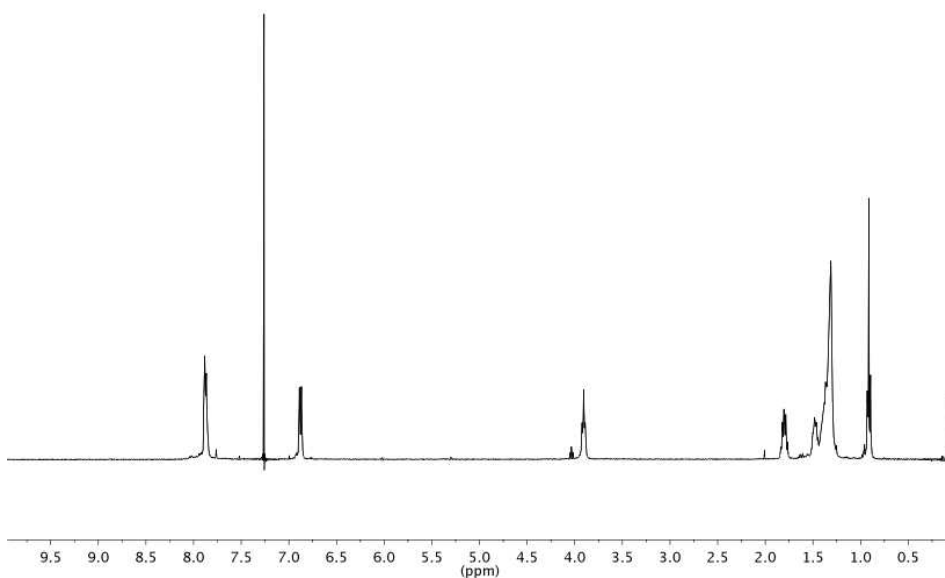

### **4c** p-decyloxy discotic after DSC

p-decyloxyTPDLCpostDSC

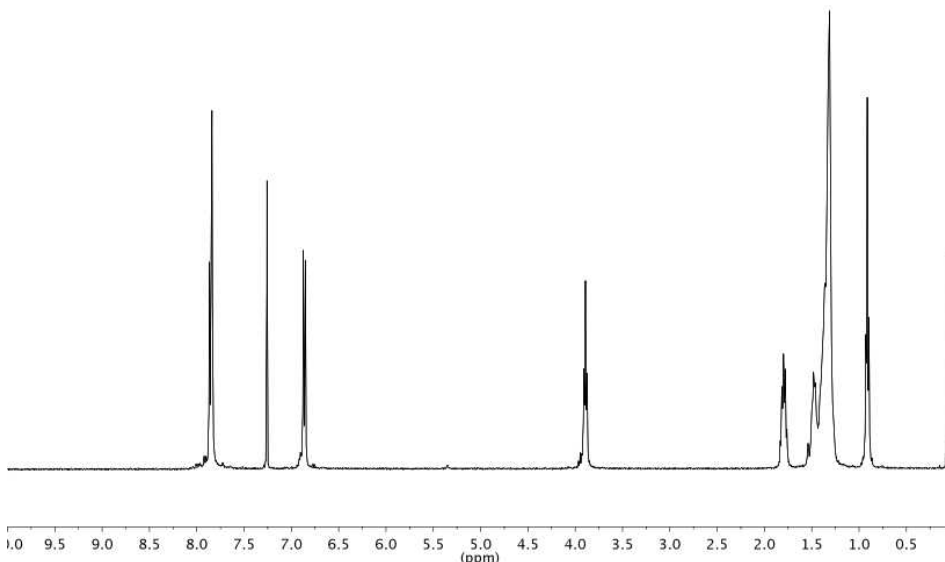



### 4k 3,5-di(3,7-dimethyloctyloxy) discotic before DSC

3\_5-dimetoctyloxyTPDLC-2

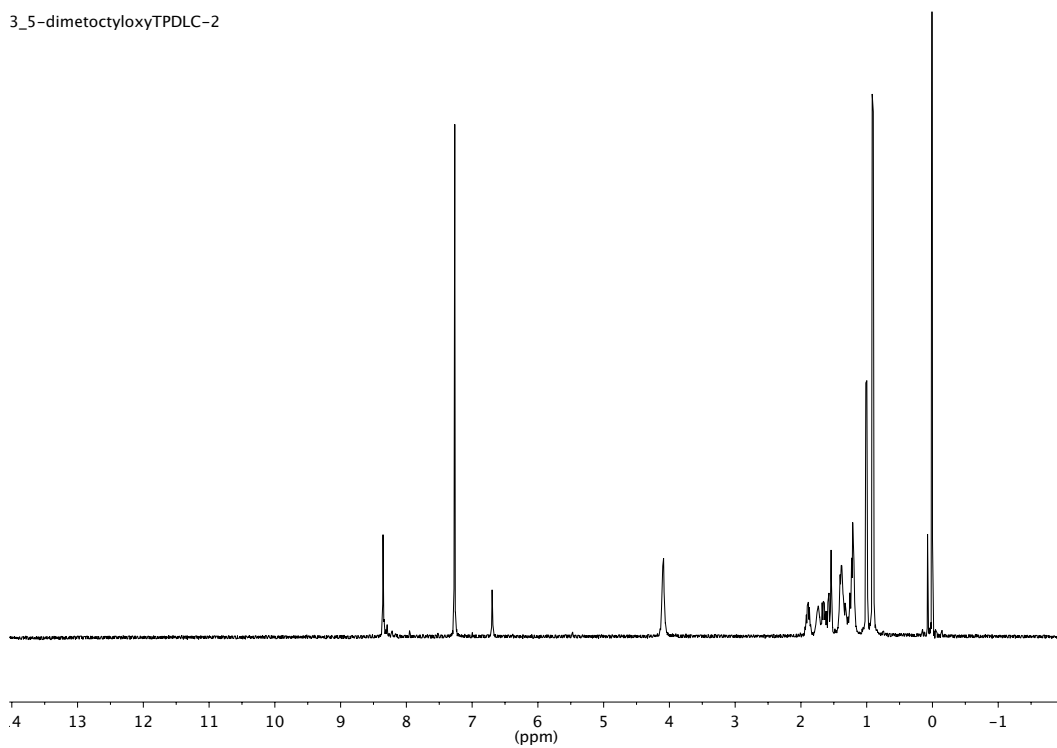

### 4k 3,5-di(3,7-dimethyloctyloxy) discotic after DSC

3-5didimetoctyloxyTPDLCpostDSC

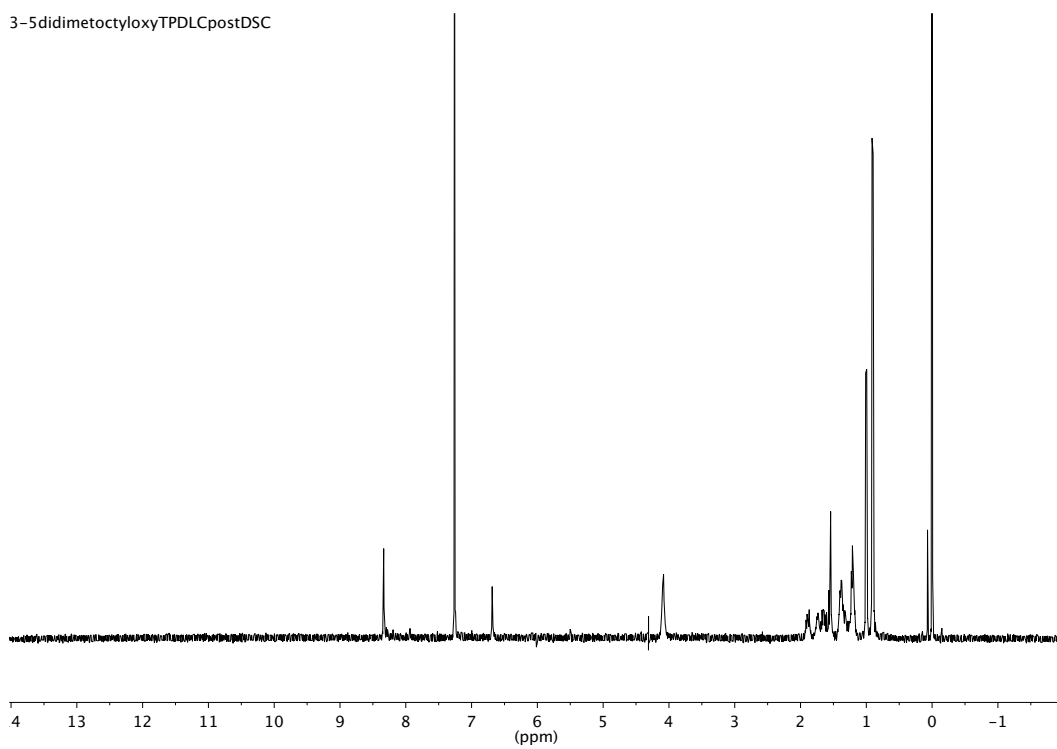

NMR of DLC **4k** acquired after sitting in a vial on a bench top under ambient conditions.

LT185-benchtop  
4 weeks on bench top

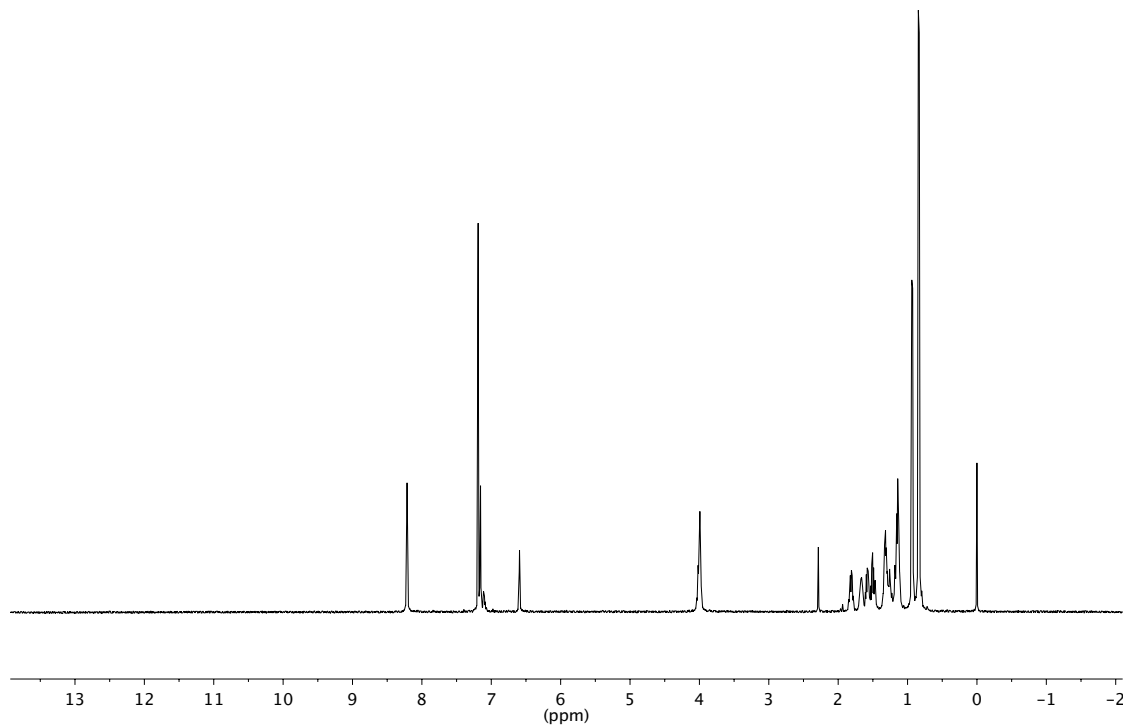

## DLC TGA

TGA data acquired for **4c**

Sample: BK-4C  
Size: 2.4590 mg  
Method: HiRes\_20\_4\_4\_300\_N2

TGA

File: E:\...TGA\TGAruns\TGA Ben King\BK-4C.  
Operator: sz  
Run Date: 21-May-12 13:33  
Instrument: TGA Q500 V5.3 Build 171

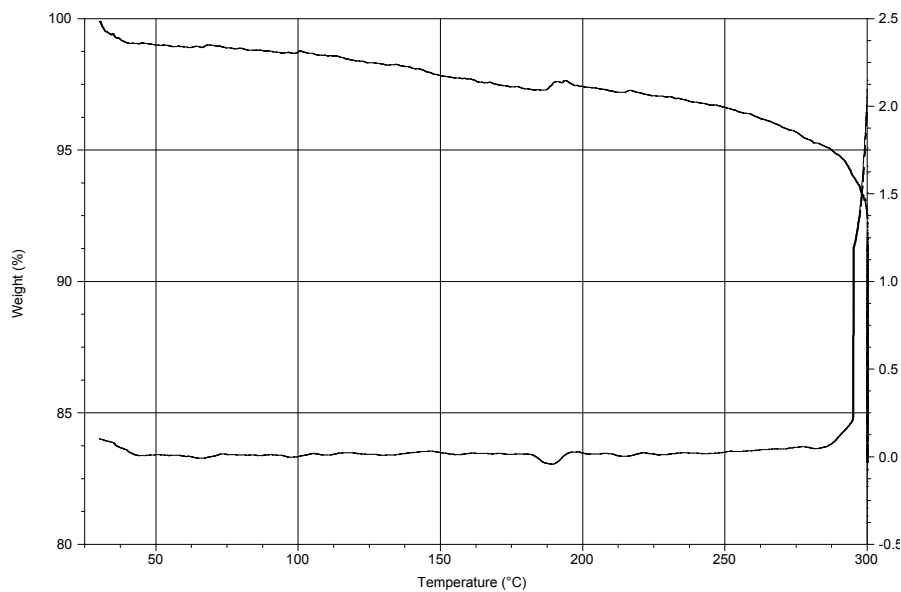

## TGA data acquired for 4k

Sample: BK-4K\_N2  
Size: 2.9460 mg  
Method: HiRes\_20\_4\_4\_300\_N2

TGA

File: E:\...TGARuns\TGA Ben King\BK-4K\_N2.C  
Operator: sz  
Run Date: 14-May-12 08:18  
Instrument: TGA Q500 V5.3 Build 171

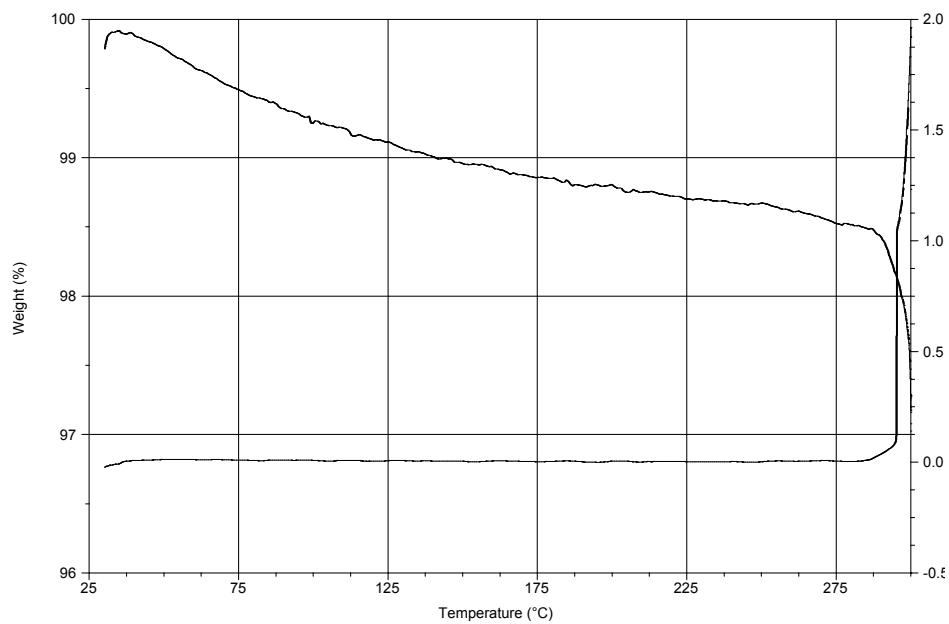

## POM

**4k** 3,5-di(3,7-dimethyloctyloxy) discotic

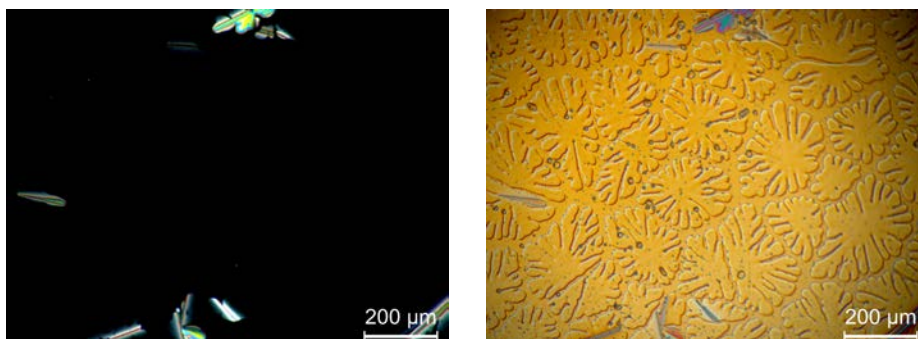

Left: POM image of **4k** between glass at 180° C right: DIC image of **4k** between glass, same location and temperature as POM picture.

**4c** p-decyloxy discotic

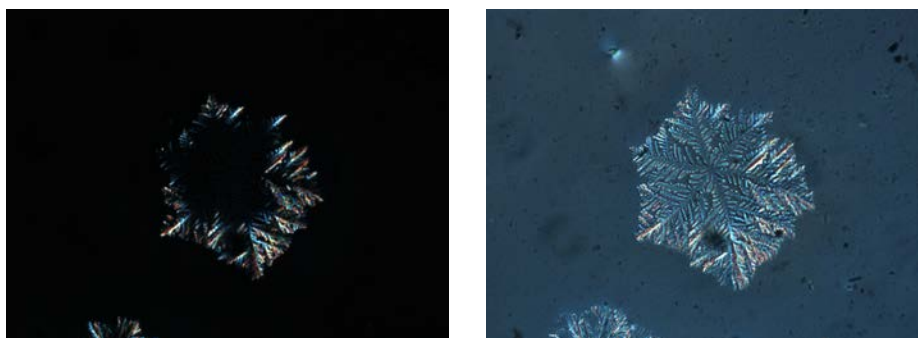

Left: POM image of **4c** at 198° C between glass right: DIC image of **4c** between glass, same location and temperature as POM picture.

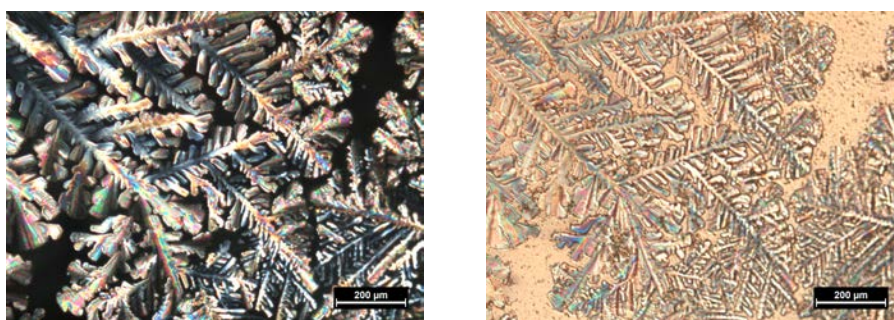

Left: POM image of **4d** between glass at 190° C; right: DIC image of **4d** between glass, same location and temperature as POM picture.

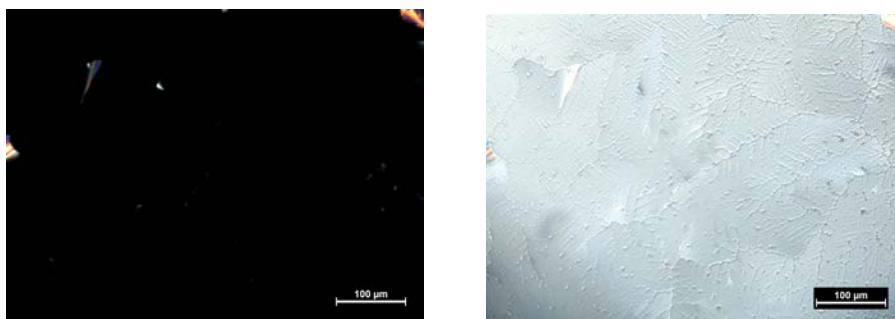

Left: POM image of **4j** between glass at 70° C; right: DIC image of **4j** between glass, same location and temperature as POM picture.

### **Computational Methods**

All compounds were modeled using the freeware Avogadro program<sup>1</sup> followed by geometry optimization at the semi-empirical UFF level of theory. These geometries were saved as \*.xyz files then edited to include appropriate input parameters for geometry optimization at the density functional level of theory. Density functional geometry optimizations were then conducted at the B3LYP/6-31G\* level of theory using the Gaussian '03 program suite.<sup>2</sup> Each computation produced a binary checkpoint file upon completion. The frontier orbital diagrams were modeled by using the “formchk” script and the graphics were rendered in Avogadro.

### Sample Gaussian Input

File: ~john1887/01/133/hexamethoxytriphenylene.in

```
%nproc=4  
%chk=hexamethoxytriphenylene.chk  
%mem=3GB  
#N opt B3LYP/6-31G*
```

hexamethoxytriphenylene, dft gas, b3lyp, 6-31g\*

```
0 1  
C -1.103750 -2.942300 -1.596690  
C -0.496330 -1.787540 -1.066060  
C -1.276350 -0.603880 -0.969630  
C -2.617220 -0.648670 -1.421890  
C -3.155498 -1.710927 -2.132746  
C -2.321690 -2.848898 -2.387777  
C -0.649195 0.666541 -0.855219  
C 0.763262 0.774015 -0.937165  
C 1.549682 -0.421362 -0.973073  
C 0.935840 -1.699012 -1.012802  
C -1.397628 1.860454 -0.666458  
C -0.809095 3.112145 -0.637065  
C 0.578202 3.234077 -0.821727  
C 1.347486 2.070800 -0.959760  
C 1.776242 -2.863228 -0.995432  
C 3.184443 -2.748915 -0.914643  
C 3.760064 -1.467577 -0.880250  
C 2.956015 -0.347084 -0.919674  
O -1.638797 4.179993 -0.471925  
C -1.352522 5.494278 -0.755380  
O 1.161795 4.456863 -0.820582  
C 2.239930 4.847600 -1.591279  
O 3.992938 -3.846472 -0.849143  
C 3.612913 -5.173072 -0.804213  
O 5.095562 -1.221736 -0.787713  
C 6.135609 -2.111687 -0.840061  
O -4.429613 -1.486840 -2.559129  
C -5.233099 -2.136623 -3.444715  
O -2.632560 -3.979790 -3.068435  
C -3.750690 -4.718509 -3.369109  
H -3.154607 0.243644 -1.679502  
H -0.515854 -3.763698 -1.965477  
H 1.369753 -3.854172 -1.010140  
H 3.481699 0.579372 -0.868593  
H -2.461483 1.857278 -0.532100  
H 2.401507 2.228044 -1.074110  
H -2.266751 6.096721 -0.593895
```

|   |           |           |           |
|---|-----------|-----------|-----------|
| H | -1.061030 | 5.572685  | -1.824982 |
| H | -0.559792 | 5.896447  | -0.091544 |
| H | 2.015984  | 5.854429  | -2.003408 |
| H | 2.406993  | 4.165944  | -2.452688 |
| H | 3.151501  | 4.924020  | -0.964760 |
| H | 7.074048  | -1.531817 | -0.722808 |
| H | 6.145555  | -2.609412 | -1.830855 |
| H | 6.073932  | -2.840874 | -0.007261 |
| H | 4.529491  | -5.797952 | -0.734850 |
| H | 3.069581  | -5.458762 | -1.728437 |
| H | 2.993279  | -5.378224 | 0.095125  |
| H | -4.645451 | -4.405727 | -3.874375 |
| H | -3.667410 | -4.811403 | -4.467343 |
| H | -4.270527 | -5.000656 | -2.424913 |
| H | -6.116489 | -1.506933 | -3.650309 |
| H | -5.672872 | -3.015725 | -2.945884 |
| H | -4.697202 | -2.282849 | -4.412509 |



### B3LYP/6-31G\* Optimized Geometries

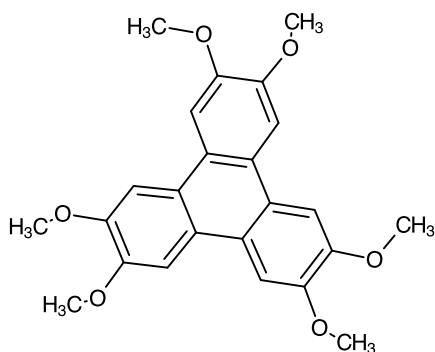

File:

~john1887/01/133/hexamethoxytriphenylene.out

B3LYP/6-31G\* Energy:

-1380.2949023 Hartree

HOMO Energy: -5.23 eV

LUMO Energy: -0.64 eV

NImag: 0

Coordinates (in Å):

|   |           |           |           |   |           |           |           |
|---|-----------|-----------|-----------|---|-----------|-----------|-----------|
| C | -2.793198 | 0.281429  | -0.039983 | C | -4.644150 | -3.416585 | 1.267235  |
| C | -1.388218 | 0.137773  | -0.044509 | O | -5.010324 | -0.583460 | 0.013023  |
| C | -0.845255 | -1.175925 | -0.045916 | C | -5.702706 | -0.983604 | -1.175597 |
| C | -1.736010 | -2.270692 | 0.004430  | H | -1.371816 | -3.290587 | 0.025703  |
| C | -3.108347 | -2.107944 | 0.030154  | H | -3.261571 | 1.258003  | -0.063434 |
| C | -3.649500 | -0.803225 | -0.013722 | H | -2.071144 | 2.770489  | -0.008435 |
| C | 0.602822  | -1.368807 | -0.095356 | H | 2.816272  | 2.169828  | -0.089307 |
| C | 1.468232  | -0.247428 | -0.131928 | H | 0.567995  | -3.550787 | -0.089013 |
| C | 0.910386  | 1.104094  | -0.093395 | H | 3.529982  | 0.382843  | -0.269305 |
| C | -0.493796 | 1.296031  | -0.057081 | H | 4.045318  | -5.642723 | 0.634153  |
| C | 1.181372  | -2.658266 | -0.112658 | H | 3.212139  | -4.549660 | 1.775564  |
| C | 2.543528  | -2.862256 | -0.180909 | H | 4.715906  | -4.018823 | 0.959034  |
| C | 3.408870  | -1.739454 | -0.246038 | H | 6.635371  | -1.376700 | -0.586641 |
| C | 2.864099  | -0.466499 | -0.212782 | H | 5.626832  | -0.278656 | 0.397158  |
| C | -1.001708 | 2.616757  | -0.030264 | H | 5.422416  | -0.332362 | -1.379990 |
| C | -0.173211 | 3.726389  | -0.036241 | H | 2.930523  | 6.167369  | 0.868095  |
| C | 1.232398  | 3.534808  | -0.048083 | H | 2.446727  | 4.827935  | 1.947090  |
| C | 1.736194  | 2.251305  | -0.076970 | H | 1.203974  | 5.914689  | 1.251824  |
| O | 3.020384  | -4.147376 | -0.265401 | H | -2.111368 | 6.353073  | -0.086536 |
| C | 3.795977  | -4.600422 | 0.846484  | H | -2.497791 | 4.867094  | 0.826518  |
| O | 4.741390  | -2.016787 | -0.353632 | H | -2.463246 | 4.836829  | -0.962742 |
| C | 5.644401  | -0.930245 | -0.486663 | H | -5.582431 | -2.054858 | -1.365823 |
| O | -0.601682 | 5.022916  | -0.038015 | H | -6.756968 | -0.753305 | -1.004767 |
| C | -1.999121 | 5.267587  | -0.066070 | H | -5.341550 | -0.415256 | -2.042659 |
| O | 2.106547  | 4.592911  | -0.100752 | H | -5.230941 | -4.327747 | 1.129269  |
| C | 2.160650  | 5.417763  | 1.065694  | H | -5.310959 | -2.572724 | 1.471708  |
| O | -3.916374 | -3.224138 | 0.048801  | H | -3.955452 | -3.551999 | 2.111362  |

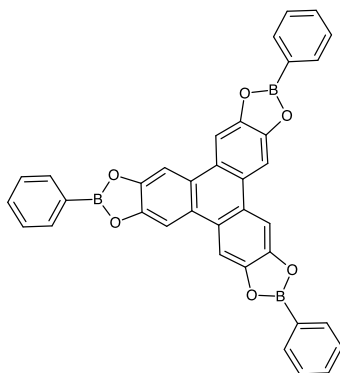

File:  
~john1887/01/126/triphenylene-ph.out

B3LYP/6-31G\* Energy:  
-1910.7558186 Hartree

HOMO Energy: -5.65 eV  
LUMO Energy: -1.23 eV

NImag: 0

Coordinates (in Å):

|   |            |           |           |   |            |           |           |
|---|------------|-----------|-----------|---|------------|-----------|-----------|
| C | 5.490473   | 7.732417  | -0.032187 | C | -7.966810  | -1.481604 | -0.029615 |
| C | 4.750867   | 8.917227  | 0.008884  | O | -4.918223  | -1.318934 | -0.010399 |
| C | 3.354806   | 8.870478  | 0.044803  | O | 3.346789   | 3.836772  | -0.030871 |
| C | 2.701000   | 7.639845  | 0.039669  | O | 1.649277   | -4.816866 | 0.010260  |
| C | 3.427984   | 6.435366  | -0.000938 | B | 3.043900   | -4.879481 | -0.002623 |
| C | 4.833378   | 6.503530  | -0.036856 | C | 3.859300   | -6.186287 | 0.005034  |
| B | 2.703713   | 5.075832  | -0.005218 | C | 3.216556   | -7.438110 | 0.033397  |
| O | 1.316715   | 4.918050  | 0.021435  | C | 3.953482   | -8.620833 | 0.041266  |
| C | 1.103006   | 3.557591  | 0.010619  | C | 5.349764   | -8.571322 | 0.020703  |
| C | 2.336824   | 2.900434  | -0.020241 | C | 6.006421   | -7.338244 | -0.007663 |
| C | 2.422538   | 1.533311  | -0.033777 | C | 5.266302   | -6.157513 | -0.015303 |
| C | 1.220915   | 0.774827  | -0.015892 | O | 3.601179   | -3.599411 | -0.020772 |
| C | -0.038686  | 1.445661  | 0.009248  | H | -2.624452  | 2.409459  | 0.032729  |
| C | -0.079463  | 2.866080  | 0.024775  | H | -2.453389  | -2.583115 | -0.030803 |
| C | 1.271172   | -0.689633 | -0.017654 | H | -0.774965  | -3.476782 | 0.028232  |
| C | 0.060210   | -1.445150 | -0.003809 | H | 3.463416   | -0.832417 | -0.034234 |
| C | -1.233318  | -0.756295 | 0.000269  | H | -7.393569  | -2.404887 | -0.045921 |
| C | -1.282030  | 0.670172  | 0.013618  | H | -9.870078  | -2.490334 | -0.057586 |
| C | 0.116460   | -2.865095 | 0.007837  | H | -11.184810 | -0.382722 | -0.020710 |
| C | 1.343438   | -3.474116 | -0.000615 | H | -7.541342  | 1.894376  | 0.039388  |
| C | 2.529713   | -2.734059 | -0.018905 | H | -10.017912 | 1.810069  | 0.027904  |
| C | 2.521974   | -1.364257 | -0.026152 | H | 2.130527   | -7.478769 | 0.049604  |
| C | -2.539932  | 1.331479  | 0.024175  | H | 5.925825   | -9.493193 | 0.026799  |
| C | -3.680851  | 0.573554  | 0.018230  | H | 3.443140   | -9.580087 | 0.063373  |
| C | -3.633149  | -0.823745 | -0.000556 | H | 7.092426   | -7.300148 | -0.023542 |
| C | -2.443119  | -1.502044 | -0.010165 | H | 5.778593   | -5.199198 | -0.037038 |
| O | -4.996720  | 0.980086  | 0.021813  | H | 1.615010   | 7.605377  | 0.067554  |
| B | -5.748281  | -0.196431 | 0.004196  | H | 2.779992   | 9.792254  | 0.076626  |
| C | -7.287744  | -0.249020 | -0.002291 | H | 5.262231   | 9.876510  | 0.012792  |
| C | -8.049896  | 0.934042  | 0.018294  | H | 6.576280   | 7.769346  | -0.060097 |
| C | -9.442665  | 0.888152  | 0.011852  | H | 5.410225   | 5.582895  | -0.068563 |
| C | -10.098377 | -0.345446 | -0.015529 | H | -1.010369  | 3.415878  | 0.047757  |
| C | -9.359464  | -1.531211 | -0.036274 | H | 3.397974   | 1.067222  | -0.057266 |

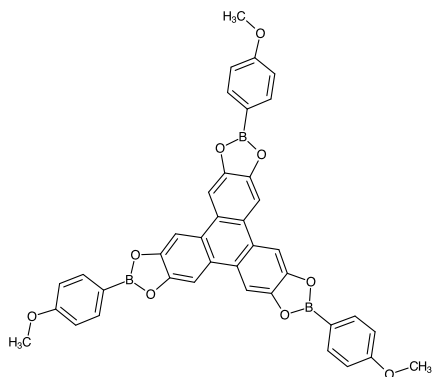

File:  
~john1887/01/109/triphenylene-  
ch3\_geom-opt.out

B3LYP/6-31G\* Energy:  
-3399.1498113 Hartree

HOMO Energy: --5.45 eV  
LUMO Energy: -0.97 eV

NImag:0

Coordinates (in Å):

|   |           |           |           |   |            |           |           |
|---|-----------|-----------|-----------|---|------------|-----------|-----------|
| C | -1.431692 | 0.206134  | -0.000500 | C | 0.015801   | 8.104062  | -0.000519 |
| C | -0.911896 | -1.123178 | -0.000561 | C | 0.207082   | 9.484864  | -0.000486 |
| C | 0.536767  | -1.343283 | -0.000433 | H | -0.999523  | 7.715994  | -0.001074 |
| C | 1.427882  | -0.228468 | 0.000427  | H | -0.652448  | 10.145427 | -0.000974 |
| C | 0.894286  | 1.136185  | 0.000410  | H | 3.608764   | 9.541051  | 0.001404  |
| C | -0.516698 | 1.350581  | -0.000295 | H | 3.254072   | 7.080937  | 0.001349  |
| C | -1.805800 | -2.228322 | -0.000582 | O | 1.820945   | 11.322817 | 0.000326  |
| C | -3.153765 | -1.984414 | -0.000655 | C | 0.759614   | 12.266924 | -0.000765 |
| C | -3.663074 | -0.681836 | -0.000625 | H | 1.235081   | 13.249221 | -0.000955 |
| C | -2.838175 | 0.411757  | -0.000474 | H | 0.131537   | 12.167435 | 0.893859  |
| C | 1.062154  | -2.664105 | -0.001065 | H | 0.132594   | 12.166581 | -0.896030 |
| C | 2.421777  | -2.831584 | -0.000513 | C | -11.003696 | -5.475298 | 0.001379  |
| C | 3.294865  | -1.738975 | 0.000629  | H | -12.092109 | -5.554824 | 0.002023  |
| C | 2.831917  | -0.449766 | 0.001054  | H | -10.602802 | -5.968655 | 0.896166  |
| C | 1.775655  | 2.251348  | 0.000868  | H | -10.603966 | -5.968893 | -0.893786 |
| C | -1.026789 | 2.677334  | -0.000712 | C | 10.244640  | -6.790895 | 0.000913  |
| C | -0.141588 | 3.722754  | -0.000275 | H | 10.857482  | -7.693900 | 0.000648  |
| C | 1.241130  | 3.512607  | 0.000540  | H | 10.471421  | -6.198320 | 0.896583  |
| H | -1.456427 | -3.251710 | -0.000401 | H | 10.472927  | -6.196783 | -0.893357 |
| H | -3.275879 | 1.400631  | -0.000233 | C | -9.414841  | -3.689209 | 0.000570  |
| H | -2.087724 | 2.886514  | -0.001471 | C | -9.202136  | -2.300185 | -0.000071 |
| H | 2.850807  | 2.135749  | 0.001356  | C | -7.910532  | -1.798626 | -0.000487 |
| H | 0.424719  | -3.537635 | -0.002021 | O | -10.716992 | -4.084132 | 0.001059  |
| H | 3.543368  | 0.364583  | 0.001851  | H | -10.067588 | -1.644859 | -0.000185 |
| O | -4.200463 | -2.878802 | -0.000650 | C | 5.513730   | -5.950482 | -0.001376 |
| O | -5.038833 | -0.734644 | -0.000514 | C | 6.594028   | -6.818056 | -0.001538 |
| O | 3.155799  | -3.996380 | -0.000902 | C | 7.903263   | -6.307591 | -0.000290 |
| O | 4.592887  | -2.197746 | 0.001011  | C | 7.011286   | -4.065102 | 0.001207  |
| O | 1.883204  | 4.730485  | 0.000812  | C | 8.111482   | -4.921117 | 0.001100  |
| O | -0.392870 | 5.076369  | -0.000561 | H | 9.113194   | -4.506823 | 0.002081  |
| B | -5.358802 | -2.095570 | -0.000561 | O | 8.896365   | -7.237790 | -0.000594 |
| B | 4.494305  | -3.592575 | 0.000073  | C | 5.693100   | -4.550386 | -0.000012 |
| B | 0.864594  | 5.688051  | 0.000047  | H | 7.182871   | -2.991760 | 0.002254  |
| C | 1.095103  | 7.205047  | 0.000131  | H | 4.506179   | -6.357886 | -0.002295 |
| C | -7.026936 | -4.038459 | 0.000259  | H | 6.459380   | -7.895246 | -0.002597 |
| C | -8.318464 | -4.563039 | 0.000684  | C | -6.787887  | -2.654300 | -0.000281 |
| C | 2.397368  | 7.749684  | 0.000848  | H | -8.460873  | -5.637666 | 0.001145  |
| C | 2.608569  | 9.119058  | 0.000878  | H | -6.183202  | -4.723724 | 0.000344  |
| C | 1.511929  | 9.997665  | 0.000203  | H | -7.759438  | -0.722368 | -0.000899 |

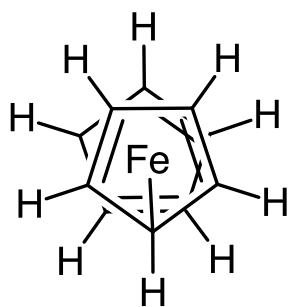

Coordinates (in Å):

|    |           |           |           |
|----|-----------|-----------|-----------|
| C  | 1.652095  | -0.480334 | 1.116658  |
| C  | 1.657139  | -1.208892 | -0.110847 |
| C  | 1.659836  | -0.266628 | -1.183063 |
| C  | 1.656408  | 1.044547  | -0.618641 |
| C  | 1.652772  | 0.912418  | 0.802576  |
| Fe | 0.000299  | -0.001021 | -0.003238 |
| C  | -1.655398 | -1.046529 | 0.615823  |
| C  | -1.652767 | 0.261307  | 1.187097  |
| C  | -1.654136 | 1.208904  | 0.119708  |
| C  | -1.658690 | 0.486375  | -1.111320 |
| C  | -1.658483 | -0.907586 | -0.805021 |

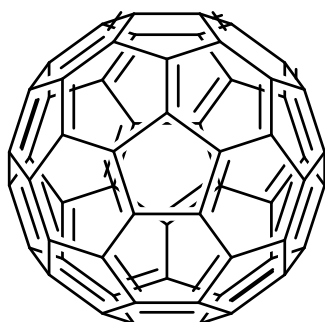

Coordinates (in Å):

|   |           |           |          |
|---|-----------|-----------|----------|
| C | 0.000000  | 1.236140  | 3.327546 |
| C | -1.175639 | 0.381988  | 3.327546 |
| C | -0.726585 | -1.000058 | 3.327546 |
| C | 0.726585  | -1.000058 | 3.327546 |
| C | 1.175639  | 0.381988  | 3.327546 |
| C | -2.600095 | -2.342583 | 0.593644 |
| C | -1.424456 | -3.196735 | 0.593644 |
| C | -0.697871 | -2.960653 | 1.829784 |
| C | -1.424456 | -1.960595 | 2.593761 |
| C | -2.600095 | -1.578607 | 1.829784 |
| C | 1.424456  | -3.196735 | 0.593644 |
| C | 2.600095  | -2.342583 | 0.593644 |
| C | 2.600095  | -1.578607 | 1.829784 |
| C | 1.424456  | -1.960595 | 2.593761 |
| C | 0.697871  | -2.960653 | 1.829784 |

File:

~john1887/01/151/ferrocene.out

B3LYP/6-31G\* Energy:

-1650.7030409 Hartree

HOMO Energy: -5.15 eV

LUMO Energy: 0.26 eV

NImag: 1

|   |           |           |           |
|---|-----------|-----------|-----------|
| H | -1.628164 | 0.493696  | 2.243957  |
| H | -1.635953 | 2.286019  | 0.225001  |
| H | -1.647843 | 0.920038  | -2.102966 |
| H | -1.651353 | -1.715859 | -1.524866 |
| H | -1.639911 | -1.981125 | 1.161578  |
| H | 1.632967  | 1.726415  | 1.515796  |
| H | 1.632684  | -0.908514 | 2.110547  |
| H | 1.644563  | -2.286458 | -0.212054 |
| H | 1.649697  | -0.504049 | -2.239059 |
| H | 1.642885  | 1.974912  | -1.171575 |

File:

~john1887/01/110/g03/c60.out

B3LYP/6-31G\* Energy:

-2286.1734331 Hartree

HOMO Energy: -5.98 eV

LUMO Energy: -3.23 eV

NImag: 0

|   |           |           |           |
|---|-----------|-----------|-----------|
| C | -3.031402 | 0.251178  | -1.829784 |
| C | -2.304818 | -0.748881 | -2.593761 |
| C | -2.304818 | -1.985021 | -1.829784 |
| C | -3.031402 | -1.748939 | -0.593644 |
| C | -3.480457 | -0.366892 | -0.593644 |
| C | -1.175639 | -2.805417 | -1.829784 |
| C | 0.000000  | -2.423429 | -2.593761 |
| C | 1.175639  | -2.805417 | -1.829784 |
| C | 0.726585  | -3.423487 | -0.593644 |
| C | -0.726585 | -3.423487 | -0.593644 |
| C | 2.304818  | -1.985021 | -1.829784 |
| C | 2.304818  | -0.748881 | -2.593761 |
| C | 3.031402  | 0.251178  | -1.829784 |
| C | 3.480457  | -0.366892 | -0.593644 |
| C | 3.031402  | -1.748939 | -0.593644 |

|   |           |           |          |   |           |           |           |
|---|-----------|-----------|----------|---|-----------|-----------|-----------|
| C | 3.480457  | 0.366892  | 0.593644 | C | 2.600095  | 1.578607  | -1.829784 |
| C | 3.031402  | 1.748939  | 0.593644 | C | 1.424456  | 1.960595  | -2.593761 |
| C | 2.304818  | 1.985021  | 1.829784 | C | 0.697871  | 2.960653  | -1.829784 |
| C | 2.304818  | 0.748881  | 2.593761 | C | 1.424456  | 3.196735  | -0.593644 |
| C | 3.031402  | -0.251178 | 1.829784 | C | 2.600095  | 2.342583  | -0.593644 |
| C | 0.726585  | 3.423487  | 0.593644 | C | -0.697871 | 2.960653  | -1.829784 |
| C | -0.726585 | 3.423487  | 0.593644 | C | -1.424456 | 1.960595  | -2.593761 |
| C | -1.175639 | 2.805417  | 1.829784 | C | -2.600095 | 1.578607  | -1.829784 |
| C | 0.000000  | 2.423429  | 2.593761 | C | -2.600095 | 2.342583  | -0.593644 |
| C | 1.175639  | 2.805417  | 1.829784 | C | -1.424456 | 3.196735  | -0.593644 |
| C | -3.031402 | 1.748939  | 0.593644 | C | -0.726585 | 1.000058  | -3.327546 |
| C | -3.480457 | 0.366892  | 0.593644 | C | 0.726585  | 1.000058  | -3.327546 |
| C | -3.031402 | -0.251178 | 1.829784 | C | 1.175639  | -0.381988 | -3.327546 |
| C | -2.304818 | 0.748881  | 2.593761 | C | 0.000000  | -1.236140 | -3.327546 |
| C | -2.304818 | 1.985021  | 1.829784 | C | -1.175639 | -0.381988 | -3.327546 |

### Table of Frontier Molecular Orbital Energies for Figure Xx

File:

~john1887/01/160/hexamethoxytriphenylene\_c3v/g03/hexamethoxytriphenylene\_c3v.out

| Molecular Orbital* | Orbital Symmetry | Energy/Hartree |
|--------------------|------------------|----------------|
| 1                  | E''              | -0.24288       |
| 2                  | E''              | -0.24288       |
| 3                  | A2''             | -0.22443       |
| 4                  | A1''             | -0.21549       |
| 5 (HOMO)           | E''              | -0.17969       |
| 6 (HOMO)           | E''              | -0.17969       |
| 7 (LUMO)           | E''              | -0.01390       |
| 8 (LUMO)           | E''              | -0.01390       |
| 9                  | A2''             | -0.00537       |
| 10                 | E''              | 0.04955        |
| 11                 | E''              | 0.04955        |

\*Arbitrary numbering

### Table of Frontier Molecular Orbital Energies for Figure 4 in Paper

File:

~john1887/01/160/triphenylene-ph\_c3h/g03/triphenylene-ph\_c3h.out

| Molecular Orbital** | Orbital Symmetry | Energy/Hartree |
|---------------------|------------------|----------------|
| 1                   | A2''             | -0.28015       |
| 2                   | E''              | -0.27754       |
| 3                   | E''              | -0.27754       |
| 4                   | E''              | -0.25615       |
| 5                   | E''              | -0.25615       |
| 6                   | A1''             | -0.25402       |
| 7                   | E''              | -0.25390       |
| 8                   | E''              | -0.25390       |
| 9                   | A2''             | -0.24848       |
| 10                  | A1''             | -0.23630       |
| 11 (HOMO)           | E''              | -0.20762       |
| 12 (HOMO)           | E''              | -0.20762       |
| 13 (LUMO)           | A2''             | -0.04504       |
| 14                  | E''              | -0.04347       |
| 15                  | E''              | -0.04347       |
| 16                  | E''              | -0.02600       |
| 17                  | E''              | -0.02600       |
| 18                  | A2''             | -0.02058       |
| 19                  | A1''             | -0.00284       |
| 20                  | E''              | -0.00278       |
| 21                  | E''              | -0.00278       |
| 22                  | E''              | 0.02931        |
| 23                  | E''              | 0.02931        |

\*\*Arbitrary numbering

## Time of Flight

Our time of flight (TOF) apparatus consisted of a SRS NL100 nitrogen laser that irradiated the sample with a 337 nm, 3 ns, 200 mJ max pulse. The laser and power supply were isolated into separate Faraday cages in order to isolate the rf noise produced from the laser. Our samples were sandwiched between FTO plates with a thickness of 3-12  $\mu\text{m}$ , controlled by mylar film. The sample thickness was confirmed by interferometry. The signal was amplified with a Stanford Research Systems DC to 350 MHz amplifier. The transients were measured across a 50- $\Omega$  resistor using a LeCroy 1 GHz digital oscilloscope. The samples were monitored via polarized optical microscopy to ensure homeotropic alignment. Our instrument was first tested using hexabutyloxytriphenylene and hexahexyloxytriphenylene, figure 1 and figure 2 respectively. The charge carrier mobilities found matched previously reported values.<sup>3</sup>

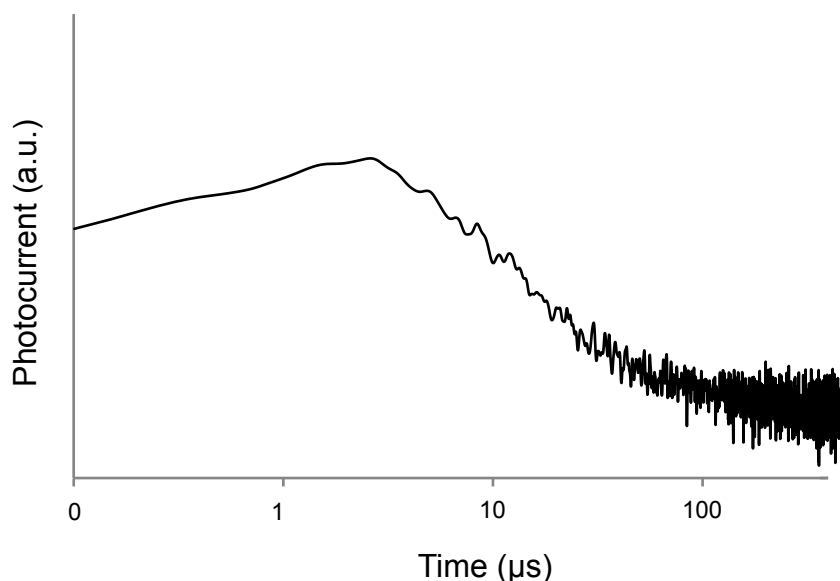

**Figure 1:** A standard TOF signal from hexabutyloxytriphenylene.

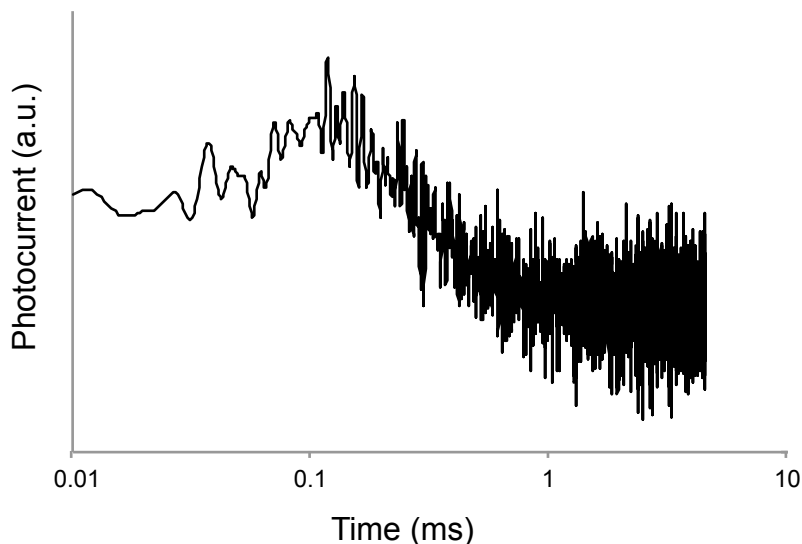

**Figure 2:** A TOF signal from hexahexyloxytriphenylene.

DLC **4c** displayed hole mobilities of  $8 \times 10^{-2} \text{ cm}^2 \text{ V}^{-1} \text{ s}^{-1}$  as seen in figure 3. Figure 3 shows a  $3.8 \mu\text{m}$  thick sample with an electric field of  $0.157 \text{ V cm}^{-1}$ .

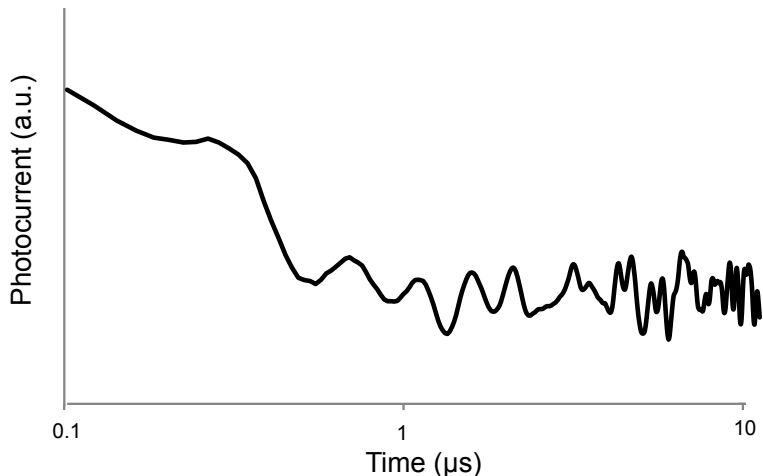

**Figure 3:** A typical TOF signal from compound **4c** at  $180 \text{ }^\circ\text{C}$ .

DLC **4d** displayed hole mobilities of  $1.1 \times 10^{-3} \text{ cm}^2 \text{ V}^{-1} \text{ s}^{-1}$  as seen in figure 4. Also, the thermal dependence of the hole mobility for compounds **4d** is shown in figure 5. The voltage dependence of the hole drift velocity of compound **4d** was studied at  $130 \text{ }^\circ\text{C}$  (figure 6).

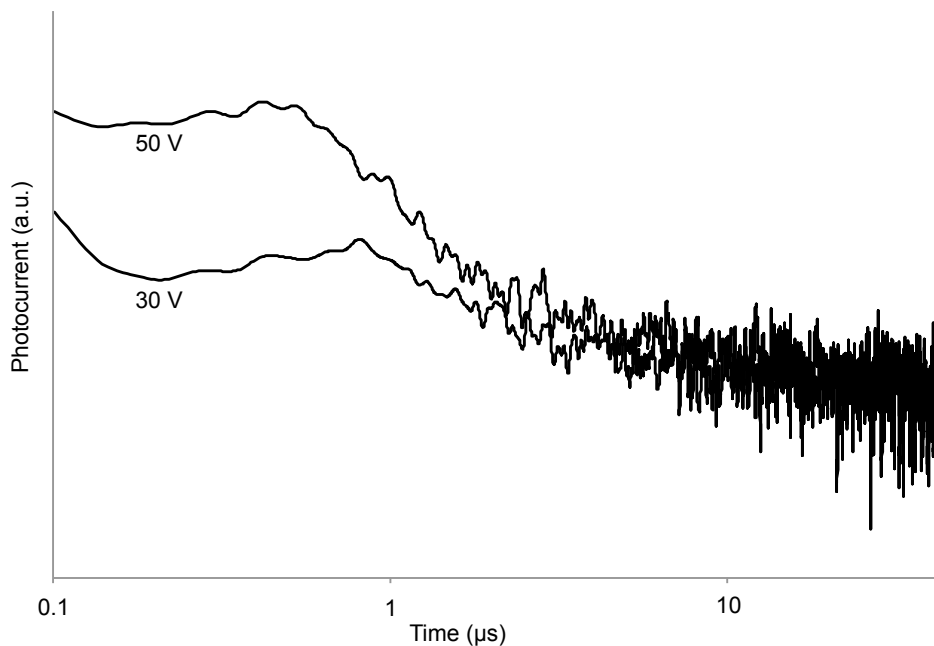

**Figure 4:** An overlay of typical TOF signals from compound **4d** at 30 (bottom) and 50 V (top), held at  $130 \text{ }^\circ\text{C}$  (sample thickness  $3.3 \mu\text{m}$ ).



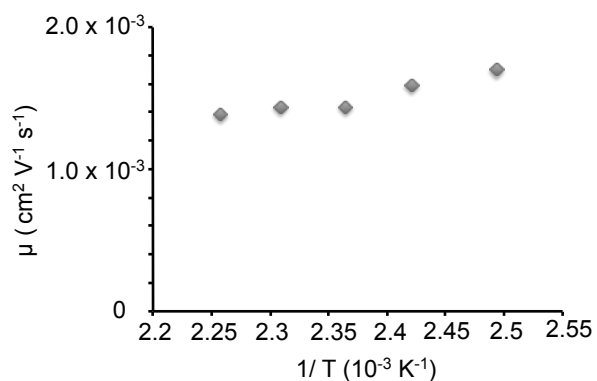

**Figure 5:** Thermal dependence of the hole mobility of compound **4d**.

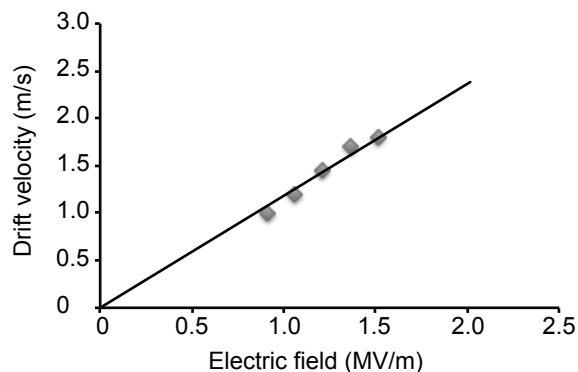

**Figure 6:** Voltage dependence of the hole drift velocity of compound **4d**.

DLC **4j** displayed hole mobilities of  $1.5 \times 10^{-2} \text{ cm}^2 \text{ V}^{-1} \text{ s}^{-1}$  as seen in figure 7.

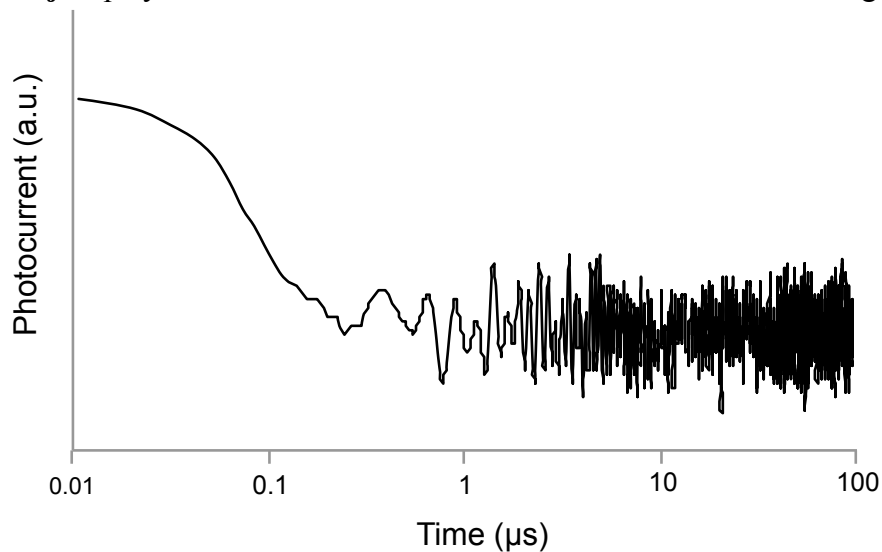

**Figure 7:** A typical TOF signal from compound **4j** (sample thickness 3 μm, 60 V)

The thermal dependence of the hole mobility for compound **4k** is shown in figure 8.

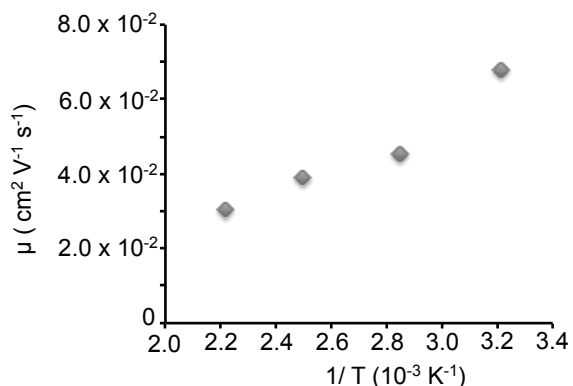

**Figure 8:** Thermal dependence of hole drift mobility for **4k** at 180 °C.

<sup>1</sup> Avogadro: an open-source molecular builder and visualization tool. Version 1.0.1.

<sup>2</sup> Gaussian 03, Revision E.01, M. J. Frisch, G. W. Trucks, H. B. Schlegel, G. E. Scuseria, M. A. Robb, J. R. Cheeseman, J. A. Montgomery, Jr., T. Vreven, K. N. Kudin, J. C. Burant, J. M. Millam, S. S. Iyengar, J. Tomasi, V. Barone, B. Mennucci, M. Cossi, G. Scalmani, N. Rega, G. A. Petersson, H. Nakatsuji, M. Hada, M. Ehara, K. Toyota, R. Fukuda, J. Hasegawa, M. Ishida, T. Nakajima, Y. Honda, O. Kitao, H. Nakai, M. Klene, X. Li, J. E. Knox, H. P. Hratchian, J. B. Cross, V. Bakken, C. Adamo, J. Jaramillo, R. Gomperts, R. E. Stratmann, O. Yazyev, A. J. Austin, R. Cammi, C. Pomelli, J. W. Ochterski, P. Y. Ayala, K. Morokuma, G. A. Voth, P. Salvador, J. J. Dannenberg, V. G. Zakrzewski, S. Dapprich, A. D. Daniels, M. C. Strain, O. Farkas, D. K. Malick, A. D. Rabuck, K. Raghavachari, J. B. Foresman, J. V. Ortiz, Q. Cui, A. G. Baboul, S. Clifford, J. Cioslowski, B. B. Stefanov, G. Liu, A. Liashenko, P. Piskorz, I. Komaromi, R. L. Martin, D. J. Fox, T. Keith, M. A. Al-Laham, C. Y. Peng, A. Nanayakkara, M. Challacombe, P. M. W. Gill, B. Johnson, W. Chen, M. W. Wong, C. Gonzalez, and J. A. Pople, Gaussian, Inc., Wallingford CT, 2004.

<sup>3</sup> (a) K. J. Donovan, T. Kreauzis, J. C. Bunning, R. J. Bushby, N. Boden, O. R. Lozman, B. Movaghar, *Mol. Liq. Cryst.*, **2003**, 396, 91-112. (b) R. J. Bushby, O. R. Lozman, *Curr. Opin. in Solid State and Mater. Sci.*, **2002**, 6, 569–578.
